# Supplementary material for: Complex transcriptional regulation and independent evolution of fungal-like traits in a relative of animals
Source: eLife journal article supplement (doi:10.7554/elife.08904), 2015-10-14
Supplement: supp [file elife-08904-supp-v1.zip]

Archive with 16 entries (16 files):
- elife_poa_e08904_Figure_7_figure_supplement_1.pdf
- elife_poa_e08904_Figure_10_figure_supplement_1.pdf
- elife_poa_e08904_Figure_6_source_data_1.xlsx
- elife_poa_e08904_Figure_7_figure_supplement_2.pdf
- elife_poa_e08904_Figure_3_figure_supplement_1.pdf
- elife_poa_e08904_Figure_2_figure_supplement_1.pdf
- elife_poa_e08904_Figure_3_figure_supplement_2.pdf
- elife_poa_e08904_Figure_10_figure_supplement_2.pdf
- elife_poa_e08904_Figure_4_figure_supplement_1.pdf
- elife_poa_e08904_Figure_2_figure_supplement_2.pdf
- elife_poa_e08904_Figure_8_source_data_1.xlsx
- elife_poa_e08904_Figure_8_source_data_1.xlsx
- elife_poa_e08904_Figure_6_source_data_1.xlsx
- elife_poa_e08904_Figure_1_figure_supplement_1.jpg
- elife_poa_e08904_Figure_2_source_data_1.xlsx
- elife_poa_e08904_Figure_4_figure_supplement_2.pdf
