# Supplementary material for: Complex transcriptional regulation and independent evolution of fungal-like traits in a relative of animals
Source: eLife journal article supplement (doi:10.7554/elife.08904), 2015-10-14
Supplement: supp [file elife-08904-supp-v1.zip]

## A Phylostratigraphy of LGT events

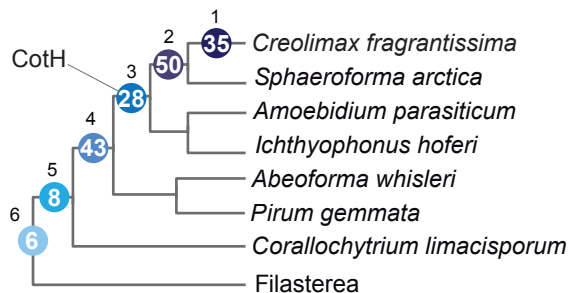

0 Origin of LGT genes found in *Creolimax*

## B

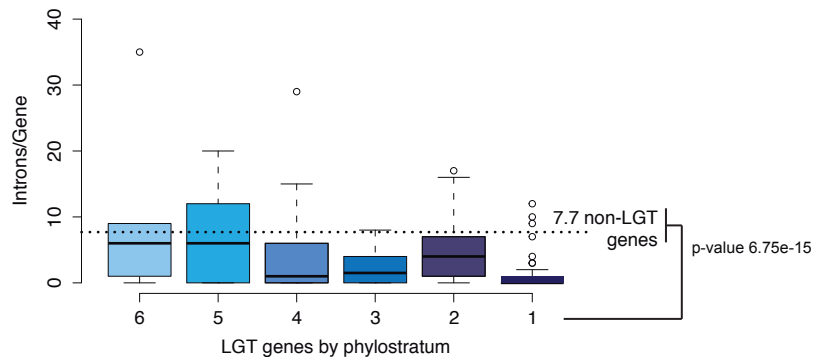

## C

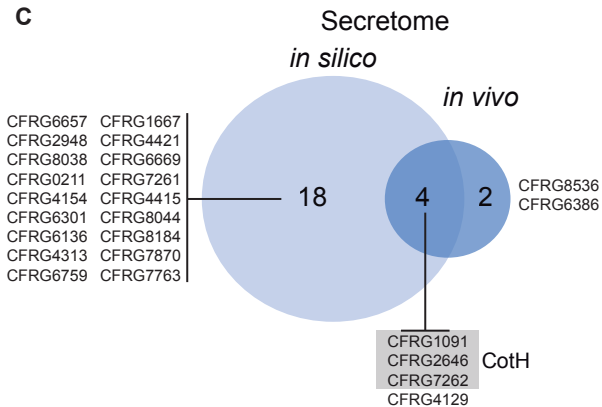

Figure 10 figure supplement 2
