# Supplementary material for: Complex transcriptional regulation and independent evolution of fungal-like traits in a relative of animals
Source: eLife journal article supplement (doi:10.7554/elife.08904), 2015-10-14
Supplement: supp [file elife-08904-supp-v1.zip › elife_poa_e08904_Figure_2_source_data_1.xlsx]

## Sheet: Hoja1
GO number	p-value	GO name	Category in Figure 2	Stage
GO:0015629	3.00449e-10	actin cytoskeleton	Actin cytoskeleton	Amoeboid enrichment
GO:0003779	4.70278e-08	actin binding	Actin cytoskeleton	Amoeboid enrichment
GO:0008154	3.69229e-06	actin polymerization or depolymerization	Actin cytoskeleton	Amoeboid enrichment
GO:0017048	1.23723e-05	Rho GTPase binding	Actin cytoskeleton	Amoeboid enrichment
GO:0031032	0.000119999	actomyosin structure organization	Actin cytoskeleton	Amoeboid enrichment
GO:0007349	0.000145918	cellularization	Actin cytoskeleton	Amoeboid enrichment
GO:0060026	0.00106705	convergent extension	Actin cytoskeleton	Amoeboid enrichment
GO:0007229	1.08628e-07	integrin-mediated signaling pathway	Cell-ECM adhesion	Amoeboid enrichment
GO:0008305	8.69757e-07	integrin complex	Cell-ECM adhesion	Amoeboid enrichment
GO:0005925	6.9362e-05	focal adhesion	Cell-ECM adhesion	Amoeboid enrichment
GO:0007160	0.000325847	cell-matrix adhesion	Cell-ECM adhesion	Amoeboid enrichment
GO:0030027	0.00034264	lamellipodium	Cell-ECM adhesion	Amoeboid enrichment
GO:0071803	0.00328527	positive regulation of podosome assembly	Cell-ECM adhesion	Amoeboid enrichment
GO:0036089	0.00328527	cleavage furrow formation	Cell-ECM adhesion	Amoeboid enrichment
GO:0005089	3.54618e-05	Rho guanyl-nucleotide exchange factor activity	GTPase activity	Amoeboid enrichment
GO:0005085	5.93448e-05	guanyl-nucleotide exchange factor activity	GTPase activity	Amoeboid enrichment
GO:0017016	0.000180546	Ras GTPase binding	GTPase activity	Amoeboid enrichment
GO:0035088	0.00034264	establishment or maintenance of apical_basal cell polarity	GTPase activity	Amoeboid enrichment
GO:0005200	0.000620783	structural constituent of cytoskeleton	GTPase activity	Amoeboid enrichment
GO:0038032	0.00124547	termination of G-protein coupled receptor signaling pathway	GTPase activity	Amoeboid enrichment
GO:0003924	0.0037848	GTPase activity	GTPase activity	Amoeboid enrichment
GO:0005525	0.00720446	GTP binding	GTPase activity	Amoeboid enrichment
GO:0051258	0.00870392	protein polymerization	GTPase activity	Amoeboid enrichment
GO:0031105	0.00948077	septin complex	GTPase activity	Amoeboid enrichment
GO:0007193	0.00948077	adenylate cyclase-inhibiting G-protein coupled receptor signaling pathway	GTPase activity	Amoeboid enrichment
GO:0001973	0.00948077	adenosine receptor signaling pathway	GTPase activity	Amoeboid enrichment
GO:0007215	0.00948077	glutamate receptor signaling pathway	GTPase activity	Amoeboid enrichment
GO:0004252	0.00130564	serine-type endopeptidase activity	Peptidase activity	Amoeboid enrichment
GO:0008236	0.00272463	serine-type peptidase activity	Peptidase activity	Amoeboid enrichment
GO:0004175	0.00287871	endopeptidase activity	Peptidase activity	Amoeboid enrichment
GO:0004190	0.00551656	aspartic-type endopeptidase activity	Peptidase activity	Amoeboid enrichment
GO:0046777	3.29559e-05	protein autophosphorylation	Protein kinase activity	Amoeboid enrichment
GO:0004674	0.000200945	protein serine_threonine kinase activity	Protein kinase activity	Amoeboid enrichment
GO:0045197	0.000209687	establishment or maintenance of epithelial cell apical_basal polarity	Protein kinase activity	Amoeboid enrichment
GO:0032147	0.000285391	activation of protein kinase activity	Protein kinase activity	Amoeboid enrichment
GO:0001726	0.00034264	ruffle	Protein kinase activity	Amoeboid enrichment
GO:0031234	0.00169841	extrinsic to internal side of plasma membrane	Protein kinase activity	Amoeboid enrichment
GO:0032433	0.00328527	filopodium tip	Protein kinase activity	Amoeboid enrichment
GO:0004708	0.00329163	MAP kinase kinase activity	Protein kinase activity	Amoeboid enrichment
GO:0034446	0.00329163	substrate adhesion-dependent cell spreading	Protein kinase activity	Amoeboid enrichment
GO:0008360	0.00503971	regulation of cell shape	Protein kinase activity	Amoeboid enrichment
GO:0031532	0.00551656	actin cytoskeleton reorganization	Protein kinase activity	Amoeboid enrichment
GO:0043406	0.00573673	positive regulation of MAP kinase activity	Protein kinase activity	Amoeboid enrichment
GO:0006979	0.00668733	response to oxidative stress	Protein kinase activity	Amoeboid enrichment
GO:0004712	0.00845402	protein serine_threonine_tyrosine kinase activity	Protein kinase activity	Amoeboid enrichment
GO:0000146	0.00948077	microfilament motor activity	Protein kinase activity	Amoeboid enrichment
GO:0031663	0.00948077	lipopolysaccharide-mediated signaling pathway	Protein kinase activity	Amoeboid enrichment
GO:0004707	0.00948077	MAP kinase activity	Protein kinase activity	Amoeboid enrichment
GO:1901607	1.08121e-10	alpha-amino acid biosynthetic process	Aminoacid metabolism	Multinucleate enrichment
GO:0006558	1.96178e-05	L-phenylalanine metabolic process	Aminoacid metabolism	Multinucleate enrichment
GO:0006568	2.34028e-05	tryptophan metabolic process	Aminoacid metabolism	Multinucleate enrichment
GO:0009073	9.61797e-05	aromatic amino acid family biosynthetic process	Aminoacid metabolism	Multinucleate enrichment
GO:0006570	0.000254742	tyrosine metabolic process	Aminoacid metabolism	Multinucleate enrichment
GO:0009082	0.000704218	branched-chain amino acid biosynthetic process	Aminoacid metabolism	Multinucleate enrichment
GO:0006595	0.00218441	polyamine metabolic process	Aminoacid metabolism	Multinucleate enrichment
GO:0006563	0.00226198	L-serine metabolic process	Aminoacid metabolism	Multinucleate enrichment
GO:0006525	0.00268916	arginine metabolic process	Aminoacid metabolism	Multinucleate enrichment
GO:0006531	0.00374028	aspartate metabolic process	Aminoacid metabolism	Multinucleate enrichment
GO:0042555	0.000209932	MCM complex	DNA replication	Multinucleate enrichment
GO:0006270	0.00177635	DNA replication initiation	DNA replication	Multinucleate enrichment
GO:0016765	0.000116094	transferase activity, transferring alkyl or aryl (other than methyl) groups	Methyltransferase activity	Multinucleate enrichment
GO:0016274	0.00209341	protein-arginine N-methyltransferase activity	Methyltransferase activity	Multinucleate enrichment
GO:0008170	0.00414467	N-methyltransferase activity	Methyltransferase activity	Multinucleate enrichment
GO:0005744	0.000422269	mitochondrial inner membrane presequence translocase complex	Mitochondrial targeting	Multinucleate enrichment
GO:0065002	0.00326778	intracellular protein transmembrane transport	Mitochondrial targeting	Multinucleate enrichment
GO:0051536	0.00822498	iron-sulfur cluster binding	Mitochondrial targeting	Multinucleate enrichment
GO:0006626	0.00855722	protein targeting to mitochondrion	Mitochondrial targeting	Multinucleate enrichment
GO:0005730	2.60441e-17	nucleolus	Ribosome biogenesis	Multinucleate enrichment
GO:0042254	3.85279e-12	ribosome biogenesis	Ribosome biogenesis	Multinucleate enrichment
GO:0005732	8.72218e-05	small nucleolar ribonucleoprotein complex	Ribosome biogenesis	Multinucleate enrichment
GO:0008757	0.000450593	S-adenosylmethionine-dependent methyltransferase activity	Ribosome biogenesis	Multinucleate enrichment
GO:0000478	0.00209341	endonucleolytic cleavage involved in rRNA processing	Ribosome biogenesis	Multinucleate enrichment
GO:0003735	0.00462211	structural constituent of ribosome	Ribosome biogenesis	Multinucleate enrichment
GO:0009451	1.09079e-11	RNA modification	RNA metabolism	Multinucleate enrichment
GO:0003723	2.27706e-08	RNA binding	RNA metabolism	Multinucleate enrichment
GO:0016072	8.79699e-08	rRNA metabolic process	RNA metabolism	Multinucleate enrichment
GO:0004812	2.97144e-06	aminoacyl-tRNA ligase activity	RNA metabolism	Multinucleate enrichment
GO:0006418	3.85188e-06	tRNA aminoacylation for protein translation	RNA metabolism	Multinucleate enrichment
GO:0008173	4.26392e-06	RNA methyltransferase activity	RNA metabolism	Multinucleate enrichment
GO:0003899	4.41538e-06	DNA-directed RNA polymerase activity	RNA metabolism	Multinucleate enrichment
GO:0006206	7.35227e-05	pyrimidine nucleobase metabolic process	RNA metabolism	Multinucleate enrichment
GO:0009982	0.000288509	pseudouridine synthase activity	RNA metabolism	Multinucleate enrichment
GO:0008033	0.000757854	tRNA processing	RNA metabolism	Multinucleate enrichment
GO:0000178	0.00137692	exosome (RNase complex)	RNA metabolism	Multinucleate enrichment
GO:0034470	0.00286049	ncRNA processing	RNA metabolism	Multinucleate enrichment
GO:0005852	4.06711e-07	eukaryotic translation initiation factor 3 complex	Translational initiation	Multinucleate enrichment
GO:0003743	3.74083e-06	translation initiation factor activity	Translational initiation	Multinucleate enrichment
GO:0006446	0.00251792	regulation of translational initiation	Translational initiation	Multinucleate enrichment
GO:0006413	0.00929585	translational initiation	Translational initiation	Multinucleate enrichment
