# Supplementary material for: Complex transcriptional regulation and independent evolution of fungal-like traits in a relative of animals
Source: eLife journal article supplement (doi:10.7554/elife.08904), 2015-10-14
Supplement: supp [file elife-08904-supp-v1.zip › elife_poa_e08904_Figure_6_source_data_1.xlsx]

## Sheet: Hsa dataset
RNA-seq HUMAN
Sample	Method	Read-Length	Read #	Source (SRA)	Reference/GEO	Comments
Adipose	Illumina	50PE,75	153569297	ERR030880,8	Human BodyMap2
Adrenal	Illumina	50PE,75	150644440	ERR030881,9	Human BodyMap2
Amnion	Illumina	54PE,72PE	50594744	SRR635193,8932	PMID:22448651
AoEndothelium	Illumina	101PE	177823848	SRR545718	GSM984618	Aortic Endothelial Cells (thoracic) from two individuals, HAoEC_7071706.1 and HAoEC_8061102.1
Brain_BA9	Illumina	50	124249831	Pending	Pending	Endoc cortex
Brain_EC	Illumina	50	67607756	Pending	Pending	BA9
Brain	Illumina	50PE,75	137826251	ERR030882,90	Human BodyMap2
FrontalGyrus_old	Illumina	76PE,100	216122751	SRR090441,2,SRR111901,SRR112672,4	PMID: 23340839
FrontalGyrus_young	Illumina	76PE,100	194915013	SRR090440,SRR107727,SRR112600,SRR111895-900	PMID: 23340839
Brain_STG	Illumina	75,76	186300000	ERR103421,5-9	PMID:22558445
Breast	Illumina	50PE,75	153057475	ERR030883,91
Cerebellum_a	Illumina	50	79453779	SRR306844-6	PMID: 22012392
Cerebellum_b	Illumina	76PE	114173445	SRR111935-7,2601,2673,5	PMID: 23340839	cerebellar cortex of postmortem brains of 25 humans (~160 days to 80 years)
Chorion	Illumina	54PE,72PE	60425049	SRR638936,41	PMID:22448651
CL_293T_a	Illumina	75PE	67568978	SRR797054	PMID: 23739326
CL_293T_b	Illumina	75PE	83789637	SRR797055	PMID: 23739326	KD for Mbnl1/2
CL_293T_c	Illumina	101PE	151386280	SRR1269754	PMID: 25219497
CL_293T_d	Illumina	101PE	159049473	SRR1269755	PMID: 25219497	Ectopicaly expressing SRRM4
CL_Colorectal_a	Illumina	101PE	NA	Pending	Pending	Colorectal cancer cell line
CL_Colorectal_b	Illumina	101PE	NA	Pending	Pending	Colorectal cancer cell line
CL_Gm12878	Illumina	75PE	212225782	SRR521447-56	GSM958728
CL_HaCaT	Illumina	101PE	100265377	Pending	Pending
CL_HeLa_a	Illumina	75PE	85935538	SRR797056	PMID: 23739326
CL_HeLa_b	Illumina	75PE	75281377	SRR797057	PMID: 23739326	KD for Mbnl1/2
CL_HUVEC	Illumina	76PE	64464576	SRR307905,6	GSM758563
CL_K562	Illumina	75PE	219833510	SRR521457-65	GSM958729
CL_MB231	Illumina	76	120901583	SRR436886	PMID: 22354987
CL_MCF7	Illumina	76PE	87432105	SRR315301,2	GSM765388
CL_PNT2	Illumina	76	59124618	SRR436884	PMID: 22354987
CL_SKNSH-RA	Illumina	76PE	78993876	SRR315315,6	GSM765395
Colon	Illumina	50PE,75	162695200	ERR030884,92	Human BodyMap2
Cortex	Illumina	76PE	115601548	SRR306838-43	PMID: 22012392
Decidua	Illumina	54PE,72PE	58062022	SRR638937,9	PMID:22448651
EndomStromalC_Diff	Illumina	74	32424387	SRR309129	GSM761683
EndomStromalC_noDiff	Illumina	74	33329086	SRR309128	GSM761684
EpithelialCells	Illumina	101PE	146844047	SRR545723	GSM984621
ESC_H1_a	Illumina	75,75PE	112504744	SRR065492,3; SRR065504; SRR065526; SRR066678	GSM591680, GSM591658
ESC_H1_c	Illumina	51	189880016	SRR031628-34	PMID: 20944595	human embryonic stem cells WA01 (same as H1)
ESC_H1_d	Illumina	76PE	78297359	SRR307911,2	GSM758566	H1-hESC
ESC_H1_e	Illumina	101PE	202255240	SRR488684	GSM915328
ESC_H1_f	Illumina	101PE	211806326	SRR488685	GSM915329
ESC_H9_a	Illumina	50,75	118572472	SRR345211-3; SRR067388-90	PMID: 21924763, PMID: 21324177
ESC_H9_b	Illumina	100PE	178391229	SRR529646,7	GSM978785
ESC_HES2	SOLiD	75	270903690	SRR094594-600	PMID: 22042643
Fibroblast	Illumina	76PE	257390785	SRR309267-70	PMID: 21890647
Gastric_cells	Illumina	100PE	106108263	SRR577583-6	GSM1010960	polysubstance abuse (NO diabetes, hypertension, coronary artery disease, cancer)
Heart_a	Illumina	75+50PE	159685646	ERR030886,94	Human BodyMap2
Heart_b	Illumina	76	80222268	SRR306847-50	PMID: 22012392
iPS_a	Illumina	104PE	134836243	SRR350717	PMID: 21915259	hiPSCs day 0
iPS_c	Illumina	101PE	221190869	SRR597912	GSM1023087	passage number: 42
iPS_d	Illumina	101PE	223517149	SRR597895	PMID: 23160490
Kidney_a	Illumina	50PE,75	234734619	ERR030885,93; SRR306851-3	Human BodyMap2, PMID: 22012392
Kidney_b	Illumina	76	74564889	SRR306851-3	PMID: 22012392
Liver_a	Illumina	75+50PE	157502500	ERR030887,95	Human BodyMap2
Liver_b	Illumina	75	67013560	SRR306854-6	PMID: 22012392
Liver_c	Illumina	58	209214171	SRR087756-8,63-9	GSM641421	Human Liver Total RNA (Ambion); rep 1,3 and 4
Lung_cells	Illumina	100PE	107076032	SRR577579-83	GSM1010946	iron deficiency, bipolar
Lung	Illumina	50PE,75	160552343	ERR030879,96	Human BodyMap2
Lymph node	Illumina	50PE,75	163994617	ERR030878,97	Human BodyMap2
Melanocytes	Illumina	101PE	145680982	SRR545714	GSM984616
MononucCells	Illumina	101PE	209023113	SRR545690	GSM984606	Mononuclear Cells (peripheral blood-single donor) from two individuals, hMNC
Muscle	Illumina	50PE,75	164975775	ERR030876,99	Human BodyMap2
Muscle_b	Illumina	58,60	285315565	SRR087770-6; SRR087777-81,94946,7	GSM641425
Ovary	Illumina	50PE,75	161949312	ERR030874,901	Human BodyMap2
Placenta	Illumina	76PE	30024380	SRR309266	GSM759889
PlacentaEpiC_a	Illumina	101PE	169980513	SRR545685	GSM984604	Technical replicates
PlacentaEpiC_b	Illumina	101PE	144785197	SRR545686	GSM984604	Technical replicates
PREC_HFDPC	Illumina	101PE	282429201	SRR534326,7	GSM981258
PREC_MSC_a	Illumina	101PE	157580617	SRR534335	GSM981260	Undifferentiated Mesenchymal Stem Cells from two individuals, hMSC-AT_9061601.12 and hMSC-AT_0102604.12 from subcutaneous abdomen adipose
PREC_MSC_b	Illumina	101PE	126487708	SRR545691	GSM984607	Undifferentiated Mesenchymal Stem Cells from two individuals, hMSC-UC_0081101.7 and hMSC-UC_0052501.7 from matrix (Wharton's Jelly)
PREC_NPC_a	Illumina	101PE	131236172	SRR447182-7	PMID: 22730494	primary neural progenitors, 17 week
PREC_NPC_b	Illumina	101PE	129585583	SRR447172-6	PMID: 22730494	lentiviral-mediated knockdown of GFP (control)
PREC_NPC_c	Illumina	101PE	128277171	SRR447177-81	PMID: 22730494	lentiviral-mediated knockdown of RBFOX1
Prostate	Illumina	50PE,75	165653978	ERR030877,98	Human BodyMap2
SaEndothelium	Illumina	101PE	132793805	SRR545707	GSM984613	Saphenous Vein Endothelial Cells from two individuals, HSaVEC
Spleen_cells	Illumina	100PE	110672100	SRR577599-603	GSM1010976	polysubstance abuse (NO diabetes, hypertension, coronary artery disease, cancer)
StrMuscleC	Illumina	101PE	220469046	SRR545712	GSM984615	Skeletal Striated Muscle Cells from two individuals, SkMC_9011302 SkMC_8121902.17 from M. pectoralis / Mm. intercostales
Testis_a	Illumina	75+50PE	163880518	ERR030873,903	Human BodyMap2
Testis_b	Illumina	76	41668863	SRR306857,8	PMID: 22012392
Thyroid	Illumina	50PE,75	162159544	ERR030972,903	Human BodyMap2
TS_BMP4	Illumina	101PE	174021823	SRR486237	GSM915320	H1 BMP4 Derived Trophoblast Cultured Cell Line, biological replicate 1 (r1)
WhiteBloodCells	Illumina	75+50PE	164002821	ERR030875,900	Human BodyMap2
