# Supplementary material for: Complex transcriptional regulation and independent evolution of fungal-like traits in a relative of animals
Source: eLife journal article supplement (doi:10.7554/elife.08904), 2015-10-14
Supplement: supp [file elife-08904-supp-v1.zip › elife_poa_e08904_Figure_8_source_data_1.xlsx]

## Sheet: All 5%FDR Rank1
Accession	Description	Score	Coverage	# Proteins	# Unique Peptides	# Peptides	# PSMs	Area	# AAs	MW [kDa]	calc. pI
Cfra_4119T1	Cfra_4119T1	1464.22	47.83	3	28	28	60	4.49276e+08	715	80.0794	4.86865
	A2	Sequence	# PSMs	# Proteins	# Protein Groups	Protein Group Accessions	Modifications	ΔCn	Area	IonScore	Exp Value	# Missed Cleavages
	High	KLMYLTIGMTTLK	2	2	1	Cfra_3417T1		0	4.00328e+07	69.82	2.55368e-07	1
	High	LMYLTIGMTTLK	1	2	1	Cfra_3417T1		0	3.74227e+07	67.63	5.26381e-07	0
	High	VSEIVIHPGYSVDDQYATNDIAMIR	1	1	1	Cfra_3417T1		0	8.57615e+07	60.51	3.7791e-06	0
	High	VSSYINWITATMK	1	2	1	Cfra_3417T1		0	3.21945e+06	58.35	4.53275e-06	0
	High	IIGGDAITDER	1	2	1	Cfra_3417T1		0	7.40679e+07	57.63	5.52268e-06	0
	High	GTAPGDSGGPLILAGPDNAVHGGTVVGLVSLGADNVLYPDIAVR	1	2	1	Cfra_3417T1		0	2.28407e+08	57.03	4.06213e-06	0
	High	SDATVASLNK	1	1	1	Cfra_3417T1		0	70339622	40.06	0.00045862	0
	High	DWVLTAAHcLDQVYNK	1	2	1	Cfra_3417T1	C9(Carbamidomethyl)	0	5.4122e+06	39.6	0.000328943	0
	High	KLmYLTIGMTTLK	3	2	1	Cfra_3417T1	M3(Oxidation)	0	6.30242e+06	39.56	0.000387318	1
	High	KLMYLTIGMTTLKK	1	2	1	Cfra_3417T1		0	1.5063e+07	37.25	0.000339057	2
	High	VSEIVIHPGYSVDDQYATNDIAmIR	1	1	1	Cfra_3417T1	M23(Oxidation)	0	7.46722e+06	36.9	0.00109233	0
	High	LMYLTIGMTTLKK	2	2	1	Cfra_3417T1		0	1.61618e+07	31.02	0.00193716	1
	Medium	DSSVPADNADLWYVGFGPTTLGGDDQPENLMAVSVQPLK	1	2	1	Cfra_3417T1		0	9.92058e+06	28.11	0.00479029	0
	Medium	LmYLTIGMTTLK	1	2	1	Cfra_3417T1	M2(Oxidation)	0	7.96193e+06	19.98	0.03918	0
	Medium	MSEcYTYGK	1	2	1	Cfra_3417T1	C4(Carbamidomethyl)	0	1.68424e+07	16.89	0.0238867	0
	Medium	DNIcTFTAGK	1	2	1	Cfra_3417T1	C4(Carbamidomethyl)	0	24740535	14.83	0.0542605	0
Cfra_4775T1	Cfra_4775T1	474.534	17.17	1	19	19	25	3.99243e+07	1316	144.202	4.61475
	A2	Sequence	# PSMs	# Proteins	# Protein Groups	Protein Group Accessions	Modifications	ΔCn	Area	IonScore	Exp Value	# Missed Cleavages
	High	AHQVVEDGYEFFAK	2	1	1	Cfra_8402T1		0	1.32315e+07	47.28	4.95731e-05	0
	High	EIFLQQPILLELQAPIK	2	1	1	Cfra_8402T1		0	1.0119e+07	41.24	8.77316e-05	0
	High	IMRPTDVPDTGLLcDLLWSDPDSDITGWGENDR	1	1	1	Cfra_8402T1	C14(Carbamidomethyl)	0	3.97312e+06	35.63	0.000588083	0
	High	IKYPENFFLLR	1	2	1	Cfra_8402T1		0	9.07474e+06	34.59	0.000903594	1
	Medium	IcGDVHGQYFDLLR	1	1	1	Cfra_8402T1	C2(Carbamidomethyl)	0	5.84054e+06	20.49	0.032159	0
	Medium	GVSFTFGPDVVQK	1	1	1	Cfra_8402T1		0	1.70893e+07	19.35	0.0482001	0
Cfra_8133T1	Cfra_8133T1	568.941	44.36	1	16	16	25	4.88483e+07	417	45.5161	9.08545
	A2	Sequence	# PSMs	# Proteins	# Protein Groups	Protein Group Accessions	Modifications	ΔCn	Area	IonScore	Exp Value	# Missed Cleavages
	High	YWPSLLITVDDVEAK	2	1	1	Cfra_3489T1		0	1.02492e+07	47.19	9.35828e-05	0
	High	FTGLAFDNFR	1	1	1	Cfra_3489T1		0	7.32362e+06	42.36	0.000145191	0
	High	VAGMIYDIDGFTLLHAEQYR	1	1	1	Cfra_3489T1		0	4.18853e+06	39.98	0.000366685	0
	High	FVSLWLNPDTGK	1	1	1	Cfra_3489T1		0	8.92659e+06	38.79	0.00060119	0
	Medium	KNVYESAPWEFLMDSPTPIK	1	1	1	Cfra_3489T1		0	6.29614e+06	28.58	0.0056857	1
	Medium	KVDFESAPTEGHPLMLQDNEPVLPSYNFEGLK	1	1	1	Cfra_3489T1		0	2.133e+07	21.65	0.0294082	1
Cfra_7049T1	Cfra_7049T1	486.202	45.69	1	14	14	19	1.59256e+08	418	46.7125	5.37646
	A2	Sequence	# PSMs	# Proteins	# Protein Groups	Protein Group Accessions	Modifications	ΔCn	Area	IonScore	Exp Value	# Missed Cleavages
	High	AVHGQHEDILLALDVLFK	2	1	1	Cfra_6437T1		0	2.03613e+07	87.36	5.05048e-09	0
	High	GNLGILQTFDR	1	1	1	Cfra_6437T1		0	9.77132e+06	57.98	4.37857e-06	0
	High	LAIESGASTIEcDAAITK	1	1	1	Cfra_6437T1	C12(Carbamidomethyl)	0	7.2824e+07	53.09	2.25818e-05	0
	High	HSLcDLEYTTDILTRPELASK	2	1	1	Cfra_6437T1	C4(Carbamidomethyl)	0	3.41811e+07	50.36	4.55623e-05	0
	High	ANHTVFMGAWSLER	1	1	1	Cfra_6437T1		0	2.18258e+07	46.33	7.44989e-05	0
	High	GAALIAPEETFLSYK	1	1	1	Cfra_6437T1		0	6.65818e+07	36.17	0.000917875	0
	High	DGEFVcR	1	1	1	Cfra_6437T1	C6(Carbamidomethyl)	0	1.67448e+07	30.17	0.00112242	0
	Medium	LSEVER	1	1	1	Cfra_6437T1		0	8.99441e+06	28.94	0.00702041	0
	Medium	NIASIGHR	1	1	1	Cfra_6437T1		0	1.74474e+07	25.92	0.0043496	0
	Medium	EQVPGWVIER	1	1	1	Cfra_6437T1		0	1.7406e+08	20.47	0.0233331	0
	Medium	LFHTDAVQcPWTDTPTEDK	1	1	1	Cfra_6437T1	C9(Carbamidomethyl)	0	3.33251e+07	18.69	0.0256894	0
	Medium	NNADSSDGMLGAcGYYYNSVLNK	1	1	1	Cfra_6437T1	C13(Carbamidomethyl)	0	3.60966e+06	17.7	0.0198224	0
Cfra_4765T1	Cfra_4765T1	551.832	44.81	2	14	14	19	8.56793e+07	308	33.4248	7.45947
	A2	Sequence	# PSMs	# Proteins	# Protein Groups	Protein Group Accessions	Modifications	ΔCn	Area	IonScore	Exp Value	# Missed Cleavages
	High	YLGDIDIEFDDEGK	1	1	1	Cfra_2752T1		0	1.67816e+07	71	9.27163e-08	0
	High	IGIIGVTTPDTVTLASPSK	2	1	1	Cfra_2752T1		0	2.63189e+07	50.78	1.92189e-05	0
	High	FLQVAGIR	1	1	1	Cfra_2752T1		0	1.67513e+07	49.15	3.22289e-05	0
	High	FVPYVILER	1	1	1	Cfra_2752T1		0	2.21367e+07	34.39	0.00100077	0
	Medium	ETIFSDPFVAVPK	1	1	1	Cfra_2752T1		0	1.57846e+07	25.63	0.0120352	0
	Medium	FLDTANHPLVAcNIDASQDPYLAGK	1	1	1	Cfra_2752T1	C12(Carbamidomethyl)	0	2.64776e+07	25.33	0.0121632	0
	Medium	YQFDLSKPVGSR	1	1	1	Cfra_2752T1		0	8.88765e+06	20.91	0.0255453	0
Cfra_4568T1	Cfra_4568T1	465.701	21.61	1	13	14	21	2.78094e+08	884	98.6379	4.62744
	A2	Sequence	# PSMs	# Proteins	# Protein Groups	Protein Group Accessions	Modifications	ΔCn	Area	IonScore	Exp Value	# Missed Cleavages
	High	WELLQQVDTSTR	2	1	1	CON_00220327.3		0	2.43339e+07	72.4	2.76211e-07	0
	High	NKLNDLEDALQQAK	3	1	1	CON_00220327.3		0	1.17571e+07	71.64	2.9476e-07	1
	High	SLDLDSIIAEVK	2	6	1	CON_00220327.3		0	4.42397e+07	54.66	1.29952e-05	0
	High	THNLEPYFESFINNLR	2	1	1	CON_00220327.3		0	2.92811e+07	49.74	4.83071e-05	0
	High	NKYEDEINKR	1	13	2	CON_00220327.3;CON_00293665.7		0	3.7467e+07	41.18	0.000327694	2
	High	YEELQITAGR	1	1	1	CON_00220327.3		0	1.70002e+07	39.91	0.000428795	0
	High	FLEQQNQVLQTK	1	8	1	CON_00220327.3		0	2.75944e+07	32.69	0.00226073	0
	High	GSGGGSSGGSIGGR	1	1	1	CON_00220327.3		0	1.5075e+06	30.56	0.00158224	0
	Medium	LRSEIDNVKK	1	3	1	CON_00220327.3		0	2.14965e+07	27.97	0.00590475	2
	Medium	SLNNQFASFIDK	1	2	1	CON_00220327.3		0	2.63023e+07	25.34	0.0118428	0
	Medium	LALDLEIATYR	1	9	1	CON_00220327.3		0	4.25681e+06	19.92	0.0341228	0
	Medium	LNDLEDALQQAK	1	1	1	CON_00220327.3		0	8.83154e+06	19.07	0.0414997	0
	High	NMQDMVEDYR	1	1	1	CON_00220327.3		0	7.02579e+06	18.35	0.0170669	0
Cfra_7050T1	Cfra_7050T1	696.054	41.49	1	13	13	28	2.0136e+08	429	48.3403	5.21143
	A2	Sequence	# PSMs	# Proteins	# Protein Groups	Protein Group Accessions	Modifications	ΔCn	Area	IonScore	Exp Value	# Missed Cleavages
	High	EAEYVIDESFYIAGLIK	2	1	1	Cfra_6846T1		0	1.08026e+07	74.02	1.52567e-07	0
	High	FLEVLGLLSYVR	2	1	1	Cfra_6846T1		0	2.29536e+07	71.47	9.97994e-08	0
	High	AEWIEFISLPFNK	1	1	1	Cfra_6846T1		0	8.86133e+07	69.26	5.57311e-07	0
	High	KYEIVDTAYK	1	1	1	Cfra_6846T1		0	7.82726e+07	68.89	4.97119e-07	1
	High	VDSDFAEFWTVEYFNSYK	2	1	1	Cfra_6846T1		0	2.34734e+07	63.53	5.17793e-07	0
	High	AEYLQAANVEMMAPGK	1	1	1	Cfra_6846T1		0	4.00708e+07	62	2.08216e-06	0
	High	YYVSSVTSDPGALHR	1	1	1	Cfra_6846T1		0	1.1344e+08	59.86	3.45975e-06	0
	High	AGHDYYTGEK	1	1	1	Cfra_6846T1		0	1.76252e+07	43.39	7.1012e-05	0
	High	TWIWR	1	1	1	Cfra_6846T1		0	49267382	34	0.000577255	0
	High	AEYLQAANVEMmAPGK	1	1	1	Cfra_6846T1	M12(Oxidation)	0	3.86108e+06	32.07	0.00176948	0
	Medium	VVTDLR	1	1	1	Cfra_6846T1		0	8.63451e+07	31.8	0.00455878	0
	Medium	GTPVPVEADLNLPPSEHFAIMPVPQVTITVDETVPLR	2	1	1	Cfra_6846T1		0	1.64869e+07	22.56	0.0124791	0
	Medium	YVPAGTYEYTTSPcLQK	1	1	1	Cfra_6846T1	C14(Carbamidomethyl)	0	2.83133e+07	22.2	0.0147627	0
Cfra_4547T1	Cfra_4547T1	357.278	25	1	13	13	17	1.58969e+08	516	56.7345	5.75732
	A2	Sequence	# PSMs	# Proteins	# Protein Groups	Protein Group Accessions	Modifications	ΔCn	Area	IonScore	Exp Value	# Missed Cleavages
	High	FGLDFAVGAR	1	1	1	Cfra_3564T1		0	2.99335e+06	63.7	1.15176e-06	0
	High	FSSGLGMFTYTK	1	1	1	Cfra_3564T1		0	3.89136e+07	61.53	1.93345e-06	0
	High	FSVATEGIR	1	1	1	Cfra_3564T1		0	6.89002e+07	50.79	2.37599e-05	0
	High	DITYSGFDVQPVcTIAER	2	1	1	Cfra_3564T1	C13(Carbamidomethyl)	0	7.59354e+06	43.47	0.000132685	0
	High	NIFLTETGLSFK	2	1	1	Cfra_3564T1		0	5.95506e+07	43.12	0.000143821	0
	High	FGGAMVSHPLLEDR	1	1	1	Cfra_3564T1		0	7.73074e+06	36.57	0.000682907	0
	Medium	LSATQFQcILK	1	1	1	Cfra_3564T1	C8(Carbamidomethyl)	0	1.1073e+07	27.71	0.00559131	0
	High	NVIEAVVPSVVAVSK	1	1	1	Cfra_3564T1		0	2.59241e+07	26.22	0.00346233	0
	Medium	TIWELAENTIVSHEGFEAR	1	1	1	Cfra_3564T1		0	3.73414e+06	23.02	0.0239465	0
	Medium	KFGAVFLVNPR	1	1	1	Cfra_3564T1		0	9.65773e+06	22.59	0.0121178	1
	Medium	IATVLQHK	1	1	1	Cfra_3564T1		0	1.65788e+07	21.71	0.00787328	0
	Medium	FSSGLGmFTYTK	1	1	1	Cfra_3564T1	M7(Oxidation)	0	6211193	19.78	0.0294549	0
	Medium	RLSSQMR	1	1	1	Cfra_3564T1		0	4.3061e+06	17.2	0.0685966	1
Cfra_3417T1	Cfra_3417T1	497.773	62.62	2	13	13	20	1.29412e+08	305	32.7993	5.04639
	A2	Sequence	# PSMs	# Proteins	# Protein Groups	Protein Group Accessions	Modifications	ΔCn	Area	IonScore	Exp Value	# Missed Cleavages
	High	LSPTLEDILTVVAGK	1	1	1	Cfra_6671T1		0	2.99377e+07	59.42	3.08577e-06	0
	High	IWATcGTGVNVTSLVK	1	1	1	Cfra_6671T1	C5(Carbamidomethyl)	0	5.82626e+06	53.06	2.02667e-05	0
	High	ASEHPPAMIILK	1	1	1	Cfra_6671T1		0	1.37275e+07	46.44	8.73898e-05	0
	High	GFGTLYGVGK	1	1	1	Cfra_6671T1		0	1.05081e+07	40.6	0.000165483	0
	High	GIVYDTGGLSIK	1	1	1	Cfra_6671T1		0	1.04154e+07	38.11	0.00039404	0
	High	SNcASRPDALTSLLVK	1	1	1	Cfra_6671T1	C3(Carbamidomethyl)	0	1.01044e+07	36.26	0.0013604	0
	High	LVLADGVSYATR	1	1	1	Cfra_6671T1		0	1.95238e+07	35.05	0.00078152	0
	High	SGILEDSLDIK	1	1	1	Cfra_6671T1		0	1.41927e+07	33.37	0.00195609	0
	Medium	VSIEVIR	1	1	1	Cfra_6671T1		0	6.69417e+06	30.1	0.00522822	0
	Medium	YTAPAPK	1	1	1	Cfra_6671T1		0	1.06628e+07	20.1	0.0351805	0
Cfra_6437T1	Cfra_6437T1	348.916	34.91	1	12	12	14	1.04489e+08	487	53.0259	4.83057
	A2	Sequence	# PSMs	# Proteins	# Protein Groups	Protein Group Accessions	Modifications	ΔCn	Area	IonScore	Exp Value	# Missed Cleavages
	High	WVMDYTSFPVQTFK	1	1	1	Cfra_7076T1		0	1.23062e+07	53	1.55368e-05	0
	High	NDFTAQIHNMVR	2	1	1	Cfra_7076T1		0	5.63447e+06	50.9	2.19464e-05	0
	High	GYLAFNDEYEPNLNPSSLALFDK	2	1	1	Cfra_7076T1		0	7.67585e+06	31.36	0.00277833	0
	Medium	GLFLGQR	1	3	1	Cfra_7076T1		0	3.54561e+06	29.7	0.00450038	0
	Medium	MDDLAEQYHLR	1	1	1	Cfra_7076T1		0	6511696	23.7	0.0061854	0
	Medium	LTHTITSGSQDLTPQIPIWESYGEDK	1	1	1	Cfra_7076T1		0	1.68437e+07	23.7	0.0196227	0
	Medium	SAQVIPR	1	1	1	Cfra_7076T1		0	9.66472e+06	23.61	0.00871024	0
	Medium	VSVSEGGR	1	1	1	Cfra_7076T1		0	2.37791e+06	22.83	0.0216296	0
Cfra_6846T1	Cfra_6846T1	498.315	38.77	1	12	12	17	9.61328e+07	454	51.4529	4.4624
	A2	Sequence	# PSMs	# Proteins	# Protein Groups	Protein Group Accessions	Modifications	ΔCn	Area	IonScore	Exp Value	# Missed Cleavages
	High	SLTINVPAGATANIIQR	3	2	1	Cfra_6432T1		0	6.20747e+07	67.9	2.51381e-07	0
	High	YSIGYSHTDSSTTTQK	4	1	1	Cfra_6432T1		0	104481192	62.94	8.63871e-07	0
	High	GIWHQVFAMDNSGSTSSQTYTEK	3	1	1	Cfra_6432T1		0	103076799	57.31	3.25116e-06	0
	High	TVSYYSQDSWSTSQEK	1	1	1	Cfra_6432T1		0	3.72458e+07	53.31	5.44698e-06	0
	High	IFMGFIGSEPEScGVcQYGK	1	1	1	Cfra_6432T1	C13(Carbamidomethyl); C16(Carbamidomethyl)	0	7.9395e+06	40.56	0.000102602	0
	High	NILSNMSWTK	1	1	1	Cfra_6432T1		0	6.46315e+07	34.84	0.001378	0
	High	WSVEAGSSFK	1	1	1	Cfra_6432T1		0	9.51947e+07	33.32	0.00125708	0
	High	DITVGFETNcYTNAK	1	1	1	Cfra_6432T1	C10(Carbamidomethyl)	0	6.4645e+06	33.23	0.000665469	0
	Medium	GIWHQVFAmDNSGSTSSQTYTEK	2	1	1	Cfra_6432T1	M9(Oxidation)	0	1.32721e+07	20.73	0.0101433	0
Cfra_3564T1	Cfra_3564T1	319.038	8.48	1	12	12	15	5.57881e+07	1722	185.553	4.70361
	A2	Sequence	# PSMs	# Proteins	# Protein Groups	Protein Group Accessions	Modifications	ΔCn	Area	IonScore	Exp Value	# Missed Cleavages
	High	VASMVTEEQEEAIIVR	3	1	1	Cfra_3061T1		0	7.6249e+06	75.19	1.42265e-07	0
	High	TLLYGGIFAYPADK	1	1	1	Cfra_3061T1		0	4768169	35.29	0.000843034	0
	High	KLDVIADAVFVNSLR	1	1	1	Cfra_3061T1		0	5.61198e+06	34.56	0.000787377	1
	High	DMSTDLITLSR	1	1	1	Cfra_3061T1		0	2.34882e+06	34.02	0.0015653	0
	Medium	DDALKPGK	1	1	1	Cfra_3061T1		0	5.22267e+06	22.05	0.00997976	0
	Medium	HLIYQQQK	1	1	1	Cfra_3061T1		0	9.66197e+06	18.99	0.0359621	0
CON_00220327.3	SWISS-PROT:P04264 Tax_Id=9606 Gene_Symbol=KRT1 Keratin, type II cytoskeletal 1	440.342	22.2	4	12	13	18	3.6996e+07	644	65.978	8.11865
	A2	Sequence	# PSMs	# Proteins	# Protein Groups	Protein Group Accessions	Modifications	ΔCn	Area	IonScore	Exp Value	# Missed Cleavages
	High	GGGIAQVLASWYYQQGTFNTIK	3	1	1	Cfra_2685T1		0	5.2207e+07	67.63	8.71548e-07	0
	High	AMDEDGLLEK	1	1	1	Cfra_2685T1		0	2.48244e+07	44.8	5.2981e-05	0
	High	DVVTFSGHSR	1	1	1	Cfra_2685T1		0	2.65033e+07	42.49	0.000225455	0
	High	LVSWGSPR	1	3	1	Cfra_2685T1		0	5.35726e+07	42.44	0.0001739	0
	High	VINDNDPIPSLPTEAmGYK	1	1	1	Cfra_2685T1	M16(Oxidation)	0	1.00316e+07	33.36	0.00198367	0
	High	VINDNDPIPSLPTEAMGYK	1	1	1	Cfra_2685T1		0	5.30446e+07	32.46	0.00184452	0
Cfra_7087T1	Cfra_7087T1	516.893	22.04	1	11	11	17	1.27829e+08	871	93.4887	4.31006
	A2	Sequence	# PSMs	# Proteins	# Protein Groups	Protein Group Accessions	Modifications	ΔCn	Area	IonScore	Exp Value	# Missed Cleavages
	High	VSQYMDWIEYTVQNN	4	1	1	Cfra_1701T1		0	2.86069e+08	91.93	9.29754e-10	0
	High	DWVLTAAHcVYGR	2	1	1	Cfra_1701T1	C9(Carbamidomethyl)	0	9.70889e+07	69.45	3.57528e-07	0
	High	ISDVVVHPNYNSNYITNDIALLR	4	1	1	Cfra_1701T1		0	5.81366e+08	56.84	9.31564e-06	0
	High	VSQYmDWIEYTVQNN	2	1	1	Cfra_1701T1	M5(Oxidation)	0	2.07244e+07	56.48	2.81132e-06	0
	High	IVGGIPVYEK	1	1	1	Cfra_1701T1		0	6.57804e+08	48.06	4.7676e-05	0
	High	QVGIVSFGQK	1	1	1	Cfra_1701T1		0	3.39505e+08	44.36	0.000150239	0
	High	DYLHTSK	1	1	1	Cfra_1701T1		0	88818309	36.68	0.000934306	0
	High	VDALSTR	2	1	1	Cfra_1701T1		0	3.17614e+08	33.04	0.00302921	0
	High	IPFMVSLNVPNPNGNSDYHYcGGSLINK	2	1	1	Cfra_1701T1	C21(Carbamidomethyl)	0	1.1992e+07	31.14	0.00288424	0
	Medium	ESTVLTHQVHVGMNSQSDR	1	1	1	Cfra_1701T1		0	4.54266e+07	23.06	0.0138407	0
	High	VVPDQLQAVK	1	1	1	Cfra_1701T1		0	731773610	22	0.00736471	0
Cfra_1091T1	Cfra_1091T1	304.258	20.99	1	11	11	16	1.23593e+08	729	81.8198	4.71631
	A2	Sequence	# PSMs	# Proteins	# Protein Groups	Protein Group Accessions	Modifications	ΔCn	Area	IonScore	Exp Value	# Missed Cleavages
	High	IGVAIGDMVLDLSK	1	1	1	Cfra_1735T1		0	9.83053e+06	61.3	2.89111e-06	0
	High	ASSVVVSGTDIK	1	1	1	Cfra_1735T1		0	27231849	50.49	4.10921e-05	0
	High	IGDYTDFYSSR	1	1	1	Cfra_1735T1		0	5.15985e+06	49.61	1.64093e-05	0
	High	VGFGEATGK	1	1	1	Cfra_1735T1		0	1.51577e+07	47.46	7.26867e-05	0
	High	YMYWTMK	1	1	1	Cfra_1735T1		0	8.89231e+06	29.3	0.00137137	0
	Medium	GKDNALMPNWLHLPVGYHGR	1	1	1	Cfra_1735T1		0	8.26426e+06	27.65	0.00867544	1
	Medium	KFIADGDEVK	1	1	1	Cfra_1735T1		0	2.17327e+07	26.58	0.00824197	1
	Medium	WEYVPLGPFLGK	1	2	1	Cfra_1735T1		0	4.96998e+06	23.52	0.020453	0
	Medium	ALIAMDKVEMVLPAK	1	1	1	Cfra_1735T1		0	5.23083e+06	19.62	0.0332889	1
Cfra_1701T1	Cfra_1701T1	566.899	48.63	1	10	10	21	6.56981e+08	292	31.3362	5.10986
	A2	Sequence	# PSMs	# Proteins	# Protein Groups	Protein Group Accessions	Modifications	ΔCn	Area	IonScore	Exp Value	# Missed Cleavages
	High	TDALIYLGGER	1	1	1	Cfra_4568T1		0	2.32921e+08	76.72	7.87411e-08	0
	High	VDIDSLGLIDPTTNSPK	2	1	1	Cfra_4568T1		0	2.6282e+08	70.44	3.47905e-07	0
	High	MDDLAEVYR	1	2	2	Cfra_4568T1;Cfra_4564T1		0	3.62252e+07	56.91	3.66668e-06	0
	High	cQSVGAEVITDLSSGR	2	1	1	Cfra_4568T1	C1(Carbamidomethyl)	0	1.35603e+07	55.31	1.07471e-05	0
	High	WVTAYTTFPILSFK	1	1	1	Cfra_4568T1		0	5.58837e+07	53.8	1.70916e-05	0
	High	TDLAPANPWHAFEAR	2	1	1	Cfra_4568T1		0	4.07225e+07	41.44	0.000251228	0
	High	NGVLLTDETK	1	1	1	Cfra_4568T1		0	2.33357e+07	38.83	0.000634953	0
	High	GLFLSQR	1	1	1	Cfra_4568T1		0	5.85954e+07	36.6	0.000940737	0
	High	mLQDSLK	1	1	1	Cfra_4568T1	M1(Oxidation)	0	1.02533e+07	36.38	0.000863041	0
	High	AEFETEMQNLYGVNSIMVIPR	4	1	1	Cfra_4568T1		0	1.57583e+07	35.53	0.00125954	0
	Medium	SLILASGLDQLEK	1	1	1	Cfra_4568T1		0	3.38541e+08	28.48	0.0048248	0
	Medium	MLQDSLK	1	1	1	Cfra_4568T1		0	1.64864e+07	25.12	0.0121506	0
	Medium	LTISSQK	1	1	1	Cfra_4568T1		0	1.32434e+08	22.72	0.0173733	0
	Medium	IYFDTSLPEELEMEHNSFYGPTcYGYNQNEQPTSGGWK	1	1	1	Cfra_4568T1	C23(Carbamidomethyl)	0	0	16.65	0.0252439	0
	Medium	MKHSRI	1	1	1	Cfra_4568T1		0	3.54352e+06	13.8	0.0562774	2
Cfra_6671T1	Cfra_6671T1	251.308	5.95	1	10	10	10	2.1218e+07	1982	216.059	5.09717
	A2	Sequence	# PSMs	# Proteins	# Protein Groups	Protein Group Accessions	Modifications	ΔCn	Area	IonScore	Exp Value	# Missed Cleavages
	High	YAYLAVK	1	1	1	Cfra_4708T1		0	4879215	34.73	0.000392786	0
	Medium	GcPESLRR	2	1	1	Cfra_4708T1	C2(Carbamidomethyl)	0	1.06276e+07	25.72	0.00683188	1
	Medium	THILVDFcK	1	1	1	Cfra_4708T1	C8(Carbamidomethyl)	0	6.7792e+06	22.78	0.0255706	0
Cfra_6582T1	Cfra_6582T1	1345.74	50	3	9	12	60	3.75267e+09	280	29.5144	5.80811
	A2	Sequence	# PSMs	# Proteins	# Protein Groups	Protein Group Accessions	Modifications	ΔCn	Area	IonScore	Exp Value	# Missed Cleavages
	High	VNQGTVLNVIR	1	1	1	Cfra_7049T1		0	8.46467e+07	81.94	1.31146e-08	0
	High	MFITPSANPDGYEYTWTATSQNSSPR	2	1	1	Cfra_7049T1		0	2.08232e+07	66.52	3.11981e-07	0
	High	LYSLAENNNQVSLVELPGATSEGR	2	1	1	Cfra_7049T1		0	3.1442e+07	65.34	1.43283e-06	0
	High	AEAYSGVSSMSK	1	1	1	Cfra_7049T1		0	6.45864e+07	50.13	1.13281e-05	0
	High	TYDEIVDR	1	1	1	Cfra_7049T1		0	1.04119e+08	49.39	2.24406e-05	0
	High	LYSLAENNNQVSLVELPGATSEGRK	1	1	1	Cfra_7049T1		0	3.20191e+07	43.47	0.000211397	1
	High	NTYAYSGLDASGQIR	1	1	1	Cfra_7049T1		0	4.24536e+07	42.84	0.000114399	0
	High	MQTVDGEYR	1	1	1	Cfra_7049T1		0	3.38449e+07	42.09	9.57925e-05	0
	High	cDDTYGGPYPYSEPETQAMQAHVENIK	1	1	1	Cfra_7049T1	C1(Carbamidomethyl)	0	1.78335e+07	40.37	0.00010719	0
	High	ATAIEMR	1	1	1	Cfra_7049T1		0	78955139	36.8	0.00115956	0
	High	TSFTVSR	1	1	1	Cfra_7049T1		0	5.30245e+07	32.96	0.000657572	0
	Medium	ATAIEmR	1	1	1	Cfra_7049T1	M6(Oxidation)	0	5.69505e+06	27.76	0.0103009	0
	Medium	RVPGNTSGWEK	1	1	1	Cfra_7049T1		0	8.66003e+07	26.12	0.00806332	1
	High	TYSVSTSTDFYPAAGAmDDWLYDHAR	1	1	1	Cfra_7049T1	M17(Oxidation)	0	2.39487e+07	23.82	0.00484346	0
	Medium	TYSVSTSTDFYPAAGAMDDWLYDHAR	2	1	1	Cfra_7049T1		0	2.335e+08	21.47	0.00832062	0
	Medium	EVFGILK	1	1	1	Cfra_7049T1		0	1.40148e+08	16.61	0.0327409	0
Cfra_3807T1	Cfra_3807T1	625.482	42.38	1	9	14	22	8.64532e+07	512	56.1544	5.13525
	A2	Sequence	# PSMs	# Proteins	# Protein Groups	Protein Group Accessions	Modifications	ΔCn	Area	IonScore	Exp Value	# Missed Cleavages
	High	DWVLTAAHcVDGR	2	1	1	Cfra_3159T1	C9(Carbamidomethyl)	0	2.01549e+07	81.01	1.902e-08	0
	High	SDISDVIVHPK	2	1	1	Cfra_3159T1		0	1.12322e+08	67.75	4.36489e-07	0
	High	ISDVLTHQLK	2	1	1	Cfra_3159T1		0	1.23043e+08	49.08	1.73033e-05	0
	High	VGMLTQSENDYLHR	2	1	1	Cfra_3159T1		0	1.02432e+08	45.77	8.21035e-05	0
	High	NDVALIR	1	2	2	Cfra_3159T1;Cfra_7221T1		0	3.91558e+07	39.88	0.000349526	0
	High	SNLcTYTLGK	1	1	1	Cfra_3159T1	C4(Carbamidomethyl)	0	1.11438e+07	39.41	0.000355109	0
	High	IAGIVSWGQGcAR	1	1	1	Cfra_3159T1	C11(Carbamidomethyl)	0	5.56671e+07	32.86	0.00232923	0
	Medium	IIGGAPVTER	1	1	1	Cfra_3159T1		0	135823570	21.77	0.0103117	0
Cfra_1735T1	Cfra_1735T1	216.208	26.13	2	9	9	9	2.13741e+07	421	46.9813	5.35107
	A2	Sequence	# PSMs	# Proteins	# Protein Groups	Protein Group Accessions	Modifications	ΔCn	Area	IonScore	Exp Value	# Missed Cleavages
	High	sTAELAcSYAALILHDDDAEISAENIEK	2	1	1	Cfra_8100T1	N-Term(Acetyl); C7(Carbamidomethyl)	0	1.90207e+07	59.74	3.132e-06	0
	High	VDSYWFSLFAK	1	1	1	Cfra_8100T1		0	1.28456e+07	46.56	6.07201e-05	0
	High	IVLAAGVK	1	1	1	Cfra_8100T1		0	1.0801e+07	28.36	0.00226116	0
Cfra_6432T1	Cfra_6432T1	455.002	46.52	1	8	8	17	1.00918e+08	273	29.8912	5.13525
	A2	Sequence	# PSMs	# Proteins	# Protein Groups	Protein Group Accessions	Modifications	ΔCn	Area	IonScore	Exp Value	# Missed Cleavages
	High	LDIIMSVYK	1	1	1	Cfra_2646T1		0	1.16226e+07	57.5	3.91221e-06	0
	High	YVMFENPDEDcMDR	1	1	1	Cfra_2646T1	C11(Carbamidomethyl)	0	8.25635e+06	48.83	1.52811e-05	0
	High	NLAQWVAVNIVcGDIDHmGK	1	1	1	Cfra_2646T1	C12(Carbamidomethyl); M18(Oxidation)	0	8.93721e+06	47.01	5.77295e-05	0
	High	NLAQWVAVNIVcGDIDHMGK	1	1	1	Cfra_2646T1	C12(Carbamidomethyl)	0	2.74211e+07	39.88	0.000370086	0
	Medium	IVEKNDDEFFGVK	1	1	1	Cfra_2646T1		0	6547124	27.37	0.00723764	1
	Medium	YWVPAKDDIVTSVLIDTQVSEHWR	1	1	1	Cfra_2646T1		0	6.74849e+06	24.98	0.0144548	1
	Medium	FTEPITMPAVVDFSAGLK	1	1	1	Cfra_2646T1		0	4.15582e+06	18.63	0.0541498	0
	Medium	FYPMVSPVGHK	1	1	1	Cfra_2646T1		0	8.97871e+06	18.17	0.0602001	0
	Medium	DTQNPEYASDDcKLPFNIK	1	1	1	Cfra_2646T1	C12(Carbamidomethyl)	0	5.25349e+06	14.53	0.0458082	1
Cfra_2646T1	Cfra_2646T1	181.685	15.84	1	8	8	9	1.60075e+07	808	91.3616	4.729
	A2	Sequence	# PSMs	# Proteins	# Protein Groups	Protein Group Accessions	Modifications	ΔCn	Area	IonScore	Exp Value	# Missed Cleavages
	High	AAGAMDLITGYR	2	1	1	Cfra_3621T1		0	2.54142e+07	81.71	2.46203e-08	0
	High	ETcHGDFSTTLADLAAESDmLSTLVTAVK	2	1	1	Cfra_3621T1	C3(Carbamidomethyl); M20(Oxidation)	0	4.54604e+06	39.9	0.000286522	0
	High	MEYSSDELSDGEEFTSLEGSTLTVK	5	1	1	Cfra_3621T1		0	7.07004e+06	27.74	0.00196407	0
Cfra_7076T1	Cfra_7076T1	166.837	13.64	3	8	8	10	1.29382e+07	792	88.9106	5.13525
	A2	Sequence	# PSMs	# Proteins	# Protein Groups	Protein Group Accessions	Modifications	ΔCn	Area	IonScore	Exp Value	# Missed Cleavages
	High	MSIVWDR	1	1	1	Cfra_1166T1		0	2.88269e+06	39.83	0.000327575	0
	High	KGESLLGAYDTWR	1	1	1	Cfra_1166T1		0	3.92298e+06	31.67	0.00282519	1
Cfra_3159T1	Cfra_3159T1	339.398	30.77	1	7	8	12	1.23729e+08	286	30.8652	5.47803
	A2	Sequence	# PSMs	# Proteins	# Protein Groups	Protein Group Accessions	Modifications	ΔCn	Area	IonScore	Exp Value	# Missed Cleavages
	High	NNWVNVLPDNTNVGTVFGAAK	2	2	2	Cfra_3806T1;Cfra_3807T1		0	5.74158e+07	71.45	3.04361e-07	0
	High	EVLEYEDTWQYLQDFADK	2	1	1	Cfra_3807T1		0	1.2583e+07	66.82	4.99127e-07	0
	High	SYDNYVTDSAAGAVAFAAGHR	2	1	1	Cfra_3807T1		0	5.76765e+06	65.05	6.25216e-07	0
	High	NLIIAITDGMGPTYVALSR	3	1	1	Cfra_3807T1		0	1.50445e+07	63.94	1.41276e-06	0
	High	GVIDNFQIGK	2	1	1	Cfra_3807T1		0	4.58788e+07	56.87	1.1513e-05	0
	High	SDAIVPK	1	2	2	Cfra_3806T1;Cfra_3807T1		0	54889229	45.64	4.63926e-05	0
	High	YQHGYHIGIVAK	1	2	2	Cfra_3806T1;Cfra_3807T1		0	9.66396e+07	43.27	0.000183681	0
	High	SGKPYLIMVEASEIDWAGHSNDPASIVR	2	1	1	Cfra_3807T1		0	3.05494e+07	38.9	0.000528182	0
	High	WDLDLELDSAR	1	1	1	Cfra_3807T1		0	2.35825e+07	35.28	0.000874625	0
	High	IADQALLFQPDVILGGGLK	2	1	1	Cfra_3807T1		0	1.05304e+08	32.42	0.000668584	0
	Medium	FTSTGHTGTDINIYAHPPLDPFYNGLR	1	1	1	Cfra_3807T1		0	2.59882e+07	28.86	0.00650085	0
	Medium	VKNNWVNVLPDNTNVGTVFGAAK	1	2	2	Cfra_3806T1;Cfra_3807T1		0	1.50967e+07	27.46	0.00789683	1
	High	GFYTEDANAWR	1	2	2	Cfra_3806T1;Cfra_3807T1		0	2.55032e+07	25.77	0.0030914	0
	Medium	SFDDIASEVHK	1	1	1	Cfra_3807T1		0	2.18168e+07	21.96	0.0149647	0
Cfra_2752T1	Cfra_2752T1	216.422	15.9	1	7	7	8	2.49777e+07	629	68.5798	4.57666
	A2	Sequence	# PSMs	# Proteins	# Protein Groups	Protein Group Accessions	Modifications	ΔCn	Area	IonScore	Exp Value	# Missed Cleavages
	High	NAEEDGDcNAAEELIK	1	1	1	Cfra_7262T1	C8(Carbamidomethyl)	0	6.95836e+06	54.4	4.23795e-06	0
	High	LYINFLR	1	2	1	Cfra_7262T1		0	5.23436e+06	49.54	1.29764e-05	0
	High	WSHLFWDK	1	3	1	Cfra_7262T1		0	2.47798e+06	28.47	0.00305801	0
	Medium	NPDDSVAWHSEIMSISTAMK	1	1	1	Cfra_7262T1		0	7.63774e+06	14.67	0.047767	0
CON_00019359.3	SWISS-PROT:P35527 Tax_Id=9606 Gene_Symbol=KRT9 Keratin, type I cytoskeletal 9	194.308	20.39	1	7	7	8	2.23732e+07	623	62.0919	5.30029
	A2	Sequence	# PSMs	# Proteins	# Protein Groups	Protein Group Accessions	Modifications	ΔCn	Area	IonScore	Exp Value	# Missed Cleavages
	High	EITGLQDLFDmSK	1	1	1	Cfra_4129T1	M11(Oxidation)	0	3.51832e+06	60.39	2.37669e-06	0
	High	EITGLQDLFDMSK	1	1	1	Cfra_4129T1		0	2.05988e+07	57.97	4.62805e-06	0
	High	NTSESDPDIVQSFVDYLR	1	1	1	Cfra_4129T1		0	2.91324e+06	48.42	4.02864e-05	0
	Medium	IYGDAIDEASVYPITMHISTVVVNK	1	1	1	Cfra_4129T1		0	1.74257e+07	28.71	0.0057872	0
	Medium	LVVNDGNYHDTLTSATGLWEDVVGR	1	1	1	Cfra_4129T1		0	3.59091e+07	21.29	0.0308353	0
Cfra_3806T1	Cfra_3806T1	380.052	25.64	1	6	11	16	6.96482e+07	511	55.6482	5.19873
	A2	Sequence	# PSMs	# Proteins	# Protein Groups	Protein Group Accessions	Modifications	ΔCn	Area	IonScore	Exp Value	# Missed Cleavages
	High	NNWVNVLPDNTNVGTVFGAAK	2	2	2	Cfra_3806T1;Cfra_3807T1		0	5.74158e+07	71.45	3.04361e-07	0
	High	SEDSYVTDSAAGAVAFAAGHR	2	1	1	Cfra_3806T1		0	5.13075e+06	53.6	1.06946e-05	0
	High	SRSEDSYVTDSAAGAVAFAAGHR	3	1	1	Cfra_3806T1		0	9.45351e+06	50.55	2.20262e-05	1
	High	SDAIVPK	1	2	2	Cfra_3806T1;Cfra_3807T1		0	54889229	45.64	4.63926e-05	0
	High	YQHGYHIGIVAK	1	2	2	Cfra_3806T1;Cfra_3807T1		0	9.66396e+07	43.27	0.000183681	0
	High	WDLDLR	1	1	1	Cfra_3806T1		0	4.76568e+06	41.17	0.000328449	0
	High	GVIDNFKIGK	1	1	1	Cfra_3806T1		0	5.25219e+07	40.04	0.000346791	1
	Medium	VKNNWVNVLPDNTNVGTVFGAAK	1	2	2	Cfra_3806T1;Cfra_3807T1		0	1.50967e+07	27.46	0.00789683	1
	High	SLIGQHR	1	1	1	Cfra_3806T1		0	1.35186e+07	26.46	0.0036151	0
	High	GFYTEDANAWR	1	2	2	Cfra_3806T1;Cfra_3807T1		0	2.55032e+07	25.77	0.0030914	0
	Medium	SDNTAMIATSDHETGGISVGGLWIDNPTMASK	2	1	1	Cfra_3806T1		0	2.49549e+06	22.29	0.0174109	0
Cfra_3276T1	Cfra_3276T1	189.301	51.01	1	6	6	8	5.18519e+07	149	16.7849	4.22119
	A2	Sequence	# PSMs	# Proteins	# Protein Groups	Protein Group Accessions	Modifications	ΔCn	Area	IonScore	Exp Value	# Missed Cleavages
	High	DTDSEEEIIEAFR	2	1	1	Cfra_3276T1		0	5.97056e+07	59.58	1.32185e-06	0
	High	EAFSLFDKDGDGTITTK	1	1	1	Cfra_3276T1		0	9.14836e+06	41.16	0.000244991	1
	High	VFDKDGNGFISAAELR	2	1	1	Cfra_3276T1		0	3.15984e+07	40.69	0.000354037	1
	High	EADIDGDGQINYEEFVK	1	1	1	Cfra_3276T1		0	5.44051e+07	39.78	0.000220912	0
	High	aDQLTEEQIAEFK	1	1	1	Cfra_3276T1	N-Term(Acetyl)	0	4.1445e+07	30.52	0.00288326	0
	High	EAFSLFDK	1	1	1	Cfra_3276T1		0	2.11346e+06	29.53	0.00130064	0
Cfra_3337T1	Cfra_3337T1	130.738	58.27	1	6	6	6	2.92104e+07	139	15.7039	5.23682
	A2	Sequence	# PSMs	# Proteins	# Protein Groups	Protein Group Accessions	Modifications	ΔCn	Area	IonScore	Exp Value	# Missed Cleavages
	High	FNSNYGAILEAVNPTSQVIR	2	1	1	Cfra_3230T1		0	6.83916e+06	47.8	8.62985e-05	0
	Medium	YAGGAAIAVIYLPESSHIFIQGK	1	1	1	Cfra_3230T1		0	2.6213e+07	28.75	0.0044673	0
	Medium	SFPTAYVVLSGEYIGNR	1	1	1	Cfra_3230T1		0	5.52047e+06	27.04	0.00721594	0
	Medium	NVANQGGAVHVQGIFGYFFVAGK	1	1	1	Cfra_3230T1		0	7.02451e+06	25.77	0.0154937	0
	Medium	LENLEITSLTGNK	1	1	1	Cfra_3230T1		0	1.62509e+07	24.27	0.0162738	0
Cfra_4754T1	Cfra_4754T1	229.37	11.19	1	6	6	8	1.46114e+07	1046	110.674	4.80518
	A2	Sequence	# PSMs	# Proteins	# Protein Groups	Protein Group Accessions	Modifications	ΔCn	Area	IonScore	Exp Value	# Missed Cleavages
	High	TVMENFVAFVDK	1	2	1	CON_00708398.1		0	2.84688e+06	54.41	1.24974e-05	0
	Medium	SLHTLFGDELcK	1	2	1	CON_00708398.1	C11(Carbamidomethyl)	0	3.49521e+06	25.22	0.0121746	0
Cfra_3489T1	Cfra_3489T1	174.438	13.54	1	6	6	7	1.35019e+07	805	85.9719	4.71631
	A2	Sequence	# PSMs	# Proteins	# Protein Groups	Protein Group Accessions	Modifications	ΔCn	Area	IonScore	Exp Value	# Missed Cleavages
	High	GVFLGFR	1	1	1	Cfra_0839T1		0	2.16738e+06	30.46	0.0012593	0
	Medium	TLIVGSTDYSVIIAK	1	1	1	Cfra_0839T1		0	4.78048e+06	16.79	0.037694	0
Cfra_8402T1	Cfra_8402T1	177.87	33.22	2	6	6	8	1.34799e+07	307	35.4317	5.57959
	A2	Sequence	# PSMs	# Proteins	# Protein Groups	Protein Group Accessions	Modifications	ΔCn	Area	IonScore	Exp Value	# Missed Cleavages
	High	VVNDNDVVTTQPSQIFGYR	3	2	1	Cfra_8260T1		0	1.10075e+07	68.65	7.0276e-07	0
	Medium	NIFSSVR	1	2	1	Cfra_8260T1		0	9.65191e+06	19.45	0.0363203	0
Cfra_5595T1	Cfra_5595T1	147.688	5.76	1	6	6	6	1.18679e+07	1198	131.159	5.5415
	A2	Sequence	# PSMs	# Proteins	# Protein Groups	Protein Group Accessions	Modifications	ΔCn	Area	IonScore	Exp Value	# Missed Cleavages
	High	VccQWSGK	1	2	2	Cfra_3499T1;Cfra_7846T1	C2(Carbamidomethyl); C3(Carbamidomethyl)	0	3.00564e+07	44.15	4.48906e-05	0
	High	ENTcVDAGIASFK	1	1	1	Cfra_7846T1	C4(Carbamidomethyl)	0	26332952	40.09	0.000181206	0
	Medium	SADcSGAPLASVSTSK	1	1	1	Cfra_7846T1	C4(Carbamidomethyl)	0	3.10519e+07	18.42	0.0388476	0
Cfra_3061T1	Cfra_3061T1	163.724	21.3	1	6	6	8	7.63295e+06	338	36.8545	5.74463
	A2	Sequence	# PSMs	# Proteins	# Protein Groups	Protein Group Accessions	Modifications	ΔCn	Area	IonScore	Exp Value	# Missed Cleavages
	Medium	SVLDASK	1	1	1	Cfra_5567T1		0	1.70406e+06	23.44	0.019701	0
Cfra_1153T1	Cfra_1153T1	161.505	17.22	1	6	6	7	5.6666e+06	540	59.8657	6.3667
	A2	Sequence	# PSMs	# Proteins	# Protein Groups	Protein Group Accessions	Modifications	ΔCn	Area	IonScore	Exp Value	# Missed Cleavages
	High	HVKPSVSVGEK	1	1	1	Cfra_4801T1		0	1.85994e+07	27.19	0.00372421	0
Cfra_2685T1	Cfra_2685T1	215.258	25	2	5	5	8	5.29414e+07	276	29.8434	4.80518
	A2	Sequence	# PSMs	# Proteins	# Protein Groups	Protein Group Accessions	Modifications	ΔCn	Area	IonScore	Exp Value	# Missed Cleavages
	High	NTSWTFGALDPVQVVQMAK	1	1	1	Cfra_1153T1		0	4.41014e+06	62.34	2.77136e-06	0
	High	ELLGEDIFWcWDAPR	1	1	1	Cfra_1153T1	C10(Carbamidomethyl)	0	2.46845e+06	47.62	4.06507e-05	0
	High	WNVLAGIK	1	1	1	Cfra_1153T1		0	2.79405e+06	38.93	0.000473371	0
	High	TFGDAVADALK	1	1	1	Cfra_1153T1		0	5.33744e+06	36.11	0.000820436	0
	Medium	TDSEAATLLTSNIDAR	2	1	1	Cfra_1153T1		0	7.13162e+06	24.75	0.0110539	0
	Medium	DHSFILGATNPSVGTLNEEVNAMK	1	1	1	Cfra_1153T1		0	4.53075e+06	19.41	0.0378019	0
Cfra_5389T1	Cfra_5389T1	146.833	24.82	1	5	5	7	3.74312e+07	274	30.1544	6.32861
	A2	Sequence	# PSMs	# Proteins	# Protein Groups	Protein Group Accessions	Modifications	ΔCn	Area	IonScore	Exp Value	# Missed Cleavages
	High	GEAGPSGPAGPTGAR	1	1	1	CON_00707857.2		0	2.61957e+07	34.06	0.00119757	0
	High	GPAGPQGPR	1	1	1	CON_00707857.2		0	4.00653e+07	31.15	0.00188004	0
	Medium	GEGGPQGPR	1	1	1	CON_00707857.2		0	9.5618e+06	23.01	0.00800055	0
	Medium	GDAGPAGPK	2	1	1	CON_00707857.2		0	818095	22.32	0.00684157	0
	Medium	GPAGPQGPRGDK	1	1	1	CON_00707857.2		0	1.15894e+06	16.05	0.0720109	1
CON_00707857.2	SWISS-PROT:P02453 TREMBL:Q95ND9 ENSEMBL:ENSBTAP00000017420 REFSEQ:NP_001029211 (Bos taurus) Gene_Symbol=COL1A1 Collagen alpha-1(I) chain	77.3379	3.08	1	5	5	6	2.52743e+07	1463	138.854	5.78271
	A2	Sequence	# PSMs	# Proteins	# Protein Groups	Protein Group Accessions	Modifications	ΔCn	Area	IonScore	Exp Value	# Missed Cleavages
	High	ATYTEGQTIEVEWETTIAHDGGFFEIR	3	1	1	Cfra_5013T1		0	1.16244e+07	41.58	0.000187657	0
	High	FSFEYK	1	1	1	Cfra_5013T1		0	1.44729e+07	26.01	0.00363386	0
	Medium	GLNLDSDRK	1	1	1	Cfra_5013T1		0	3.73318e+07	25.37	0.0151009	1
	Medium	KGLNLDSDRK	1	1	1	Cfra_5013T1		0	1.52294e+07	18.38	0.0595366	2
Cfra_2200T1	Cfra_2200T1	182.229	25.94	2	5	5	8	2.4935e+07	266	28.5744	4.64014
	A2	Sequence	# PSMs	# Proteins	# Protein Groups	Protein Group Accessions	Modifications	ΔCn	Area	IonScore	Exp Value	# Missed Cleavages
	High	NDTVTALTSGIEGLYK	1	1	1	Cfra_7788T1		0	5.81368e+06	57.21	8.74496e-06	0
	High	ADILLVAVGR	1	1	1	Cfra_7788T1		0	3.31721e+06	55.3	3.44474e-06	0
	High	GWGSFVDSK	1	1	1	Cfra_7788T1		0	5.00593e+06	28.93	0.00262273	0
	Medium	VEGVYAIGDVIDGPMLAHK	1	1	1	Cfra_7788T1		0	1.30998e+07	19.24	0.0488409	0
Cfra_0288T1	Cfra_0288T1	201.258	11.3	1	5	5	6	1.83932e+07	602	67.5666	4.79248
	A2	Sequence	# PSMs	# Proteins	# Protein Groups	Protein Group Accessions	Modifications	ΔCn	Area	IonScore	Exp Value	# Missed Cleavages
	High	VVLHPEYNNDYLFNDIAMIR	1	1	1	Cfra_6380T1		0	4.63972e+06	38.4	0.000729947	0
	High	VSSYTDWIK	1	1	1	Cfra_6380T1		0	2.4989e+06	32.73	0.0012	0
	High	VPFMVSLNDPK	1	1	1	Cfra_6380T1		0	4.24084e+06	31.78	0.00272135	0
	Medium	DWVMTAAHcLYGR	1	2	2	Cfra_6379T1;Cfra_6380T1	C9(Carbamidomethyl)	0	5.74226e+07	15.78	0.0369937	0
Cfra_3230T1	Cfra_3230T1	127.953	16.03	1	5	5	6	1.64961e+07	599	64.1775	5.5542
	A2	Sequence	# PSMs	# Proteins	# Protein Groups	Protein Group Accessions	Modifications	ΔCn	Area	IonScore	Exp Value	# Missed Cleavages
	High	ILAQIDDILAK	1	1	1	Cfra_8536T1		0	1.33081e+08	68.66	1.58912e-07	0
	High	KILAQIDDILAK	2	1	1	Cfra_8536T1		0	8.56433e+06	59.94	1.18347e-06	1
	High	AAVHSPELALPAFK	2	1	1	Cfra_8536T1		0	1.24059e+08	36.13	0.000609453	0
CON_00009865.2	SWISS-PROT:P13645 Tax_Id=9606 Gene_Symbol=KRT10 Keratin, type I cytoskeletal 10	163.344	13.49	32	5	7	7	1.16377e+07	593	59.4749	5.21143
	A2	Sequence	# PSMs	# Proteins	# Protein Groups	Protein Group Accessions	Modifications	ΔCn	Area	IonScore	Exp Value	# Missed Cleavages
	High	AITFHcDSPR	2	1	1	Cfra_4512T1	C6(Carbamidomethyl)	0	3.64593e+07	45.05	4.22021e-05	0
	Medium	LSFMIHIDGK	1	1	1	Cfra_4512T1		0	7.12121e+06	22.44	0.031074	0
Cfra_8556T1	Cfra_8556T1	209.09	15.98	1	5	5	6	8.45261e+06	438	48.6368	4.53857
	A2	Sequence	# PSMs	# Proteins	# Protein Groups	Protein Group Accessions	Modifications	ΔCn	Area	IonScore	Exp Value	# Missed Cleavages
	High	GPVGPSGPPGK	1	1	1	CON_00731432.2		0	11460679	39.93	0.000462393	0
Cfra_1829T1	Cfra_1829T1	100	7.16	1	5	5	5	6.05026e+06	992	111.121	5.41455
	A2	Sequence	# PSMs	# Proteins	# Protein Groups	Protein Group Accessions	Modifications	ΔCn	Area	IonScore	Exp Value	# Missed Cleavages
	High	GFEGLVLGAR	1	1	1	Cfra_0684T1		0	4031244	50.84	3.79104e-05	0
CON_Trypsin	SWISS-PROT:P00761 TRYP_PIG Trypsin - Sus scrofa (Pig).	226.209	27.27	1	4	4	7	5.8593e+09	231	24.3938	7.18115
	A2	Sequence	# PSMs	# Proteins	# Protein Groups	Protein Group Accessions	Modifications	ΔCn	Area	IonScore	Exp Value	# Missed Cleavages
	High	ILGYPTHAEFVTEALMSGGAK	4	1	1	Cfra_4119T1		0	4.95285e+08	98.18	7.75479e-10	0
	High	QILLATFDQTIHQVEK	3	1	1	Cfra_4119T1		0	4.8944e+08	83.98	1.39981e-08	0
	High	INAWDISYYQSK	2	1	1	Cfra_4119T1		0	8.28095e+07	83.59	1.20319e-08	0
	High	NAMDSLVEFLGR	1	1	1	Cfra_4119T1		0	4.47404e+07	79.51	4.47775e-08	0
	High	DFVEAPSQMLENWcWEK	3	2	1	Cfra_4119T1	C14(Carbamidomethyl)	0	1.39484e+08	72.65	6.34097e-08	0
	High	LQFTAEQLDGVSEDFIASLTK	5	1	1	Cfra_4119T1		0	3.45141e+07	70.52	3.9922e-07	0
	High	NSAILEELVTLR	2	1	1	Cfra_4119T1		0	6.01233e+07	65.73	8.01902e-07	0
	High	MNNLGIDFSQNLNEVNTK	1	1	1	Cfra_4119T1		0	1.62631e+07	65.68	1.01398e-06	0
	High	LLGYFYLDLHPR	4	1	1	Cfra_4119T1		0	148864574	64.64	1.4773e-06	0
	High	VDTAEVFADLSTSIWGIDQPENTNmPASFGHLAGGYDAR	2	1	1	Cfra_4119T1	M25(Oxidation)	0	1.73663e+07	58.44	3.22242e-06	0
	High	DFVEAPSQmLENWcWEK	2	2	1	Cfra_4119T1	M9(Oxidation); C14(Carbamidomethyl)	0	2.16394e+07	56.49	2.61912e-06	0
	High	SNAGLLNKR	1	1	1	Cfra_4119T1		0	21939553	54.86	8.98117e-06	1
	High	LTPLGDQEMASLLALK	2	1	1	Cfra_4119T1		0	4.0696e+07	52.18	1.99762e-05	0
	High	RQILLATFDQTIHQVEK	1	1	1	Cfra_4119T1		0	3.63104e+08	52	1.73513e-05	1
	High	NAMDSLVEFLGREPNAEAFLISK	1	1	1	Cfra_4119T1		0	2.93927e+06	46.37	9.80368e-05	1
	High	ILGYPTHAEFVTEALmSGGAK	1	1	1	Cfra_4119T1	M16(Oxidation)	0	3.78179e+07	43.41	0.000189255	0
	High	VEGSYPQAYEVTLAYPHVFAISR	2	1	1	Cfra_4119T1		0	5.05789e+07	41.87	0.00029906	0
	High	EVGDFLSDLADK	2	1	1	Cfra_4119T1		0	3.20154e+08	41.76	0.000176704	0
	High	YLQGMLGSYR	1	1	1	Cfra_4119T1		0	2.90624e+07	34.53	0.000880927	0
	High	TLITEIK	1	1	1	Cfra_4119T1		0	1.2871e+08	34.15	0.000653806	0
	High	KSNAGLLNKR	1	1	1	Cfra_4119T1		0	9.18183e+06	33.8	0.00118808	2
	High	VDVYEK	1	2	1	Cfra_4119T1		0	6.45418e+07	31.58	0.00107729	0
	Medium	LMSEHYLTGEPIPDEMIDNLVASK	2	1	1	Cfra_4119T1		0	9.14635e+07	27.38	0.00758662	0
	Medium	LTPLGDQEmASLLALK	1	1	1	Cfra_4119T1	M9(Oxidation)	0	4.21145e+06	26.35	0.00776327	0
	High	NEEFDGK	1	1	1	Cfra_4119T1		0	7.07187e+07	25.25	0.00348462	0
	Medium	EPNAEAFLISK	1	1	1	Cfra_4119T1		0	4.12165e+07	25.16	0.0100581	0
	Medium	KSNAGLLNK	1	1	1	Cfra_4119T1		0	4.20827e+07	25.13	0.0130433	1
	Medium	NSILAPGGSR	1	2	1	Cfra_4119T1		0	5.06297e+07	24.33	0.0066416	0
	Medium	LmSEHYLTGEPIPDEMIDNLVASK	2	1	1	Cfra_4119T1	M2(Oxidation)	0	2.15678e+07	23.6	0.0172424	0
	Medium	mNNLGIDFSQNLNEVNTK	1	1	1	Cfra_4119T1	M1(Oxidation)	0	2.80119e+06	20.31	0.0311921	0
	Medium	NAmDSLVEFLGR	1	1	1	Cfra_4119T1	M3(Oxidation)	0	2.78391e+06	19.88	0.0354666	0
	Medium	KcVVADTR	1	1	1	Cfra_4119T1	C2(Carbamidomethyl)	0	7.45939e+06	19.28	0.0483931	1
	Medium	SNAGLLNK	1	1	1	Cfra_4119T1		0	127412156	18.94	0.058078	0
	Medium	VDTAEVFADLSTSIWGIDQPENTNMPASFGHLAGGYDAR	3	1	1	Cfra_4119T1		0	7.19489e+07	17.75	0.0394519	0
	Medium	YYGYLWSEVYSADmFATR	1	1	1	Cfra_4119T1	M14(Oxidation)	0	3.08812e+06	14.04	0.0460422	0
Cfra_6708T1	Cfra_6708T1	89.6041	28.86	1	4	4	4	1.17899e+08	149	15.1834	6.44287
	A2	Sequence	# PSMs	# Proteins	# Protein Groups	Protein Group Accessions	Modifications	ΔCn	Area	IonScore	Exp Value	# Missed Cleavages
	High	LVAIVSWGQGcAR	3	1	1	Cfra_6582T1	C11(Carbamidomethyl)	0	8.94539e+08	92.12	2.36298e-09	0
	High	IVLHSGYDSSILANDIAmIR	6	1	1	Cfra_6582T1	M18(Oxidation)	0	2.08425e+07	90.04	5.69728e-09	0
	High	IVLHSGYDSSILANDIAMIR	25	1	1	Cfra_6582T1		0	2.1154e+09	78.87	6.61561e-08	0
	High	IVGGVAVTER	1	1	1	Cfra_6582T1		0	3.27957e+09	69.96	3.48192e-07	0
	High	DWVVTAAHcLYGR	2	6	4	Cfra_6234T1;Cfra_6243T1;Cfra_7376T1;Cfra_6582T1	C9(Carbamidomethyl)	0	9.24528e+08	61.78	2.09079e-06	0
	High	IGMTTQSGNDYLHK	2	1	1	Cfra_6582T1		0	3.28665e+09	59.03	3.18816e-06	0
	High	VSSFIDWMNNTMDNN	4	1	1	Cfra_6582T1		0	1.03717e+09	56.79	2.44431e-06	0
	High	WGGNGFHYcGGSLINK	3	1	1	Cfra_6582T1	C9(Carbamidomethyl)	0	7.33737e+07	53.28	1.08076e-05	0
	High	VSSSYSHQLK	1	5	4	Cfra_6234T1;Cfra_6243T1;Cfra_7376T1;Cfra_6582T1		0	4.69177e+09	49.66	3.73095e-05	0
	High	IGmTTQSGNDYLHK	2	1	1	Cfra_6582T1	M3(Oxidation)	0	4.97625e+08	48.55	3.35128e-05	0
	High	VSSFIDWmNNTmDNN	1	1	1	Cfra_6582T1	M8(Oxidation); M12(Oxidation)	0	3.75288e+07	45.83	3.04899e-05	0
	High	RGYPGVNTR	2	4	4	Cfra_6234T1;Cfra_6243T1;Cfra_7376T1;Cfra_6582T1		0	2.65222e+09	38.4	0.000390269	1
	High	VSSFIDWmNNTMDNN	4	1	1	Cfra_6582T1	M8(Oxidation)	0	2.25322e+08	35.69	0.000314888	0
	High	NVcTYTPGK	1	1	1	Cfra_6582T1	C3(Carbamidomethyl)	0	2.38323e+08	32.78	0.00139716	0
	High	IPFMVSLNDPR	2	1	1	Cfra_6582T1		0	2.87533e+09	31.24	0.00308165	0
	Medium	IVGGVAVTERIPFMVSLNDPR	1	1	1	Cfra_6582T1		0	1.16492e+07	26.13	0.00841045	1
Cfra_6379T1	Cfra_6379T1	85.9518	20.85	1	4	5	6	3.21982e+07	307	32.9338	5.03369
	A2	Sequence	# PSMs	# Proteins	# Protein Groups	Protein Group Accessions	Modifications	ΔCn	Area	IonScore	Exp Value	# Missed Cleavages
	High	SLTIDVPAGAIANIIQR	2	1	1	Cfra_5389T1		0	2.77322e+07	56.77	3.47123e-06	0
	High	NILSQMSWTK	1	2	1	Cfra_5389T1		0	1.88216e+07	54.23	1.47253e-05	0
	High	DMTSANAFcPVYAK	1	1	1	Cfra_5389T1	C9(Carbamidomethyl)	0	6.3261e+06	36.47	0.000263121	0
	Medium	YPGAYEVQEMK	1	1	1	Cfra_5389T1		0	3.41915e+07	20.7	0.0178739	0
	Medium	YSIGYSHTDSTTNTEK	2	1	1	Cfra_5389T1		0	5.03699e+07	19.49	0.0131267	0
Cfra_4129T1	Cfra_4129T1	158.707	27.93	1	4	4	5	2.46445e+07	290	31.7494	4.53857
	A2	Sequence	# PSMs	# Proteins	# Protein Groups	Protein Group Accessions	Modifications	ΔCn	Area	IonScore	Exp Value	# Missed Cleavages
	High	VHIGMSAHTK	1	1	1	Cfra_6379T1		0	2.18618e+07	37.53	0.000547472	0
	High	VPFMASLNDPK	2	1	1	Cfra_6379T1		0	1.73102e+07	34.55	0.00171868	0
	High	IVGGAPIEEK	1	1	1	Cfra_6379T1		0	1.65688e+07	28.3	0.00236657	0
	Medium	VVLHPEYNNDFLFNDIAMIR	1	1	1	Cfra_6379T1		0	8.3455e+06	26.8	0.00835718	0
	Medium	DWVMTAAHcLYGR	1	2	2	Cfra_6379T1;Cfra_6380T1	C9(Carbamidomethyl)	0	5.74226e+07	15.78	0.0369937	0
CON_00293665.7	SWISS-PROT:P04259 Tax_Id=9606 Gene_Symbol=KRT6B Keratin, type II cytoskeletal 6B	131.987	9.04	23	4	5	5	2.23904e+07	564	59.9623	8.00146
	A2	Sequence	# PSMs	# Proteins	# Protein Groups	Protein Group Accessions	Modifications	ΔCn	Area	IonScore	Exp Value	# Missed Cleavages
	Medium	GPIVcSIATGEALDYGYR	1	1	1	Cfra_3666T1	C5(Carbamidomethyl)	0	3.26398e+06	27.1	0.00789687	0
	Medium	IMHGGDGIDVMLAR	1	1	1	Cfra_3666T1		0	2.29685e+06	20.13	0.0242627	0
	Medium	AENIPEAWNWcNVGGK	1	1	1	Cfra_3666T1	C11(Carbamidomethyl)	0	6.65466e+06	19.59	0.0192326	0
	Medium	YGLPDEGcFAYK	1	1	1	Cfra_3666T1	C8(Carbamidomethyl)	0	7.34846e+06	14.78	0.038829	0
Cfra_5013T1	Cfra_5013T1	115.864	18.3	1	4	4	6	2.23447e+07	235	25.3589	8.22119
	A2	Sequence	# PSMs	# Proteins	# Protein Groups	Protein Group Accessions	Modifications	ΔCn	Area	IonScore	Exp Value	# Missed Cleavages
	High	VPAASLQEELEALDALK	2	1	1	Cfra_2026T1		0	6.85546e+06	58.88	4.01201e-06	0
	Medium	VPAASLQEELEALDALKK	1	1	1	Cfra_2026T1		0	2.64515e+06	27.55	0.00492219	1
	Medium	IFIWK	1	1	1	Cfra_2026T1		0	3.17401e+06	14.65	0.053129	0
Cfra_7357T1	Cfra_7357T1	166.936	39.09	1	4	4	4	8.96642e+06	220	23.6651	4.98291
	A2	Sequence	# PSMs	# Proteins	# Protein Groups	Protein Group Accessions	Modifications	ΔCn	Area	IonScore	Exp Value	# Missed Cleavages
	High	DAEEWFFTK	1	2	1	CON_00384444.5		0	3.6601e+06	60.12	1.13542e-06	0
	High	VTMQNLNDR	1	13	4	CON_00009865.2;CON_00217963.3;CON_00384444.5;CON_00721270.3		0	1.12656e+07	47.62	8.13014e-05	0
	Medium	LAADDFR	1	36	4	CON_00009865.2;CON_00217963.3;CON_00384444.5;CON_00721270.3		0	1.14834e+07	29.16	0.00764435	0
Cfra_7788T1	Cfra_7788T1	117.868	10.71	1	4	4	4	7.97314e+06	504	53.5015	6.53662
	A2	Sequence	# PSMs	# Proteins	# Protein Groups	Protein Group Accessions	Modifications	ΔCn	Area	IonScore	Exp Value	# Missed Cleavages
	High	KESSKK	1	2	1	Cfra_2843T1		0	2.33964e+06	27.93	0.00346289	2
Cfra_7186T1	Cfra_7186T1	127.921	8.03	2	4	4	5	6.91774e+06	710	79.0154	4.84326
	A2	Sequence	# PSMs	# Proteins	# Protein Groups	Protein Group Accessions	Modifications	ΔCn	Area	IonScore	Exp Value	# Missed Cleavages
	High	TLLLAFK	1	1	1	Cfra_6534T1		0	2.17855e+06	24.84	0.00382962	0
Cfra_7262T1	Cfra_7262T1	106.09	9.75	3	4	4	4	6.61015e+06	523	58.4786	5.03369
	A2	Sequence	# PSMs	# Proteins	# Protein Groups	Protein Group Accessions	Modifications	ΔCn	Area	IonScore	Exp Value	# Missed Cleavages
	Medium	QDMQKAK	1	1	1	Cfra_5297T1		0	1.02111e+07	23.88	0.0124825	1
Cfra_3666T1	Cfra_3666T1	41.8842	17.75	1	4	4	4	5.7557e+06	338	37.2798	5.32568
	A2	Sequence	# PSMs	# Proteins	# Protein Groups	Protein Group Accessions	Modifications	ΔCn	Area	IonScore	Exp Value	# Missed Cleavages
	High	LLLIGDSGVGK	1	3	1	Cfra_8452T1		0	6.3837e+06	34.99	0.000871631	0
Cfra_6822T1	Cfra_6822T1	138.653	2.1	1	4	4	4	5.55208e+06	2376	257.351	5.05908
	A2	Sequence	# PSMs	# Proteins	# Protein Groups	Protein Group Accessions	Modifications	ΔCn	Area	IonScore	Exp Value	# Missed Cleavages
	Medium	YIITPRcLR	1	1	1	Cfra_5166T1	C7(Carbamidomethyl)	0	5.81448e+06	20.9	0.0227593	1
Cfra_8536T1	Cfra_8536T1	172.951	22.81	1	3	3	5	8.85678e+07	114	12.2063	6.75635
	A2	Sequence	# PSMs	# Proteins	# Protein Groups	Protein Group Accessions	Modifications	ΔCn	Area	IonScore	Exp Value	# Missed Cleavages
	High	DIENQYETQITQIEHEVSSSGQEVQSSAK	1	1	1	CON_00019359.3		0	2.82867e+07	77.58	5.06288e-08	0
	High	HGVQELEIELQSQLSK	2	1	1	CON_00019359.3		0	1.64798e+07	56.49	7.29262e-06	0
	High	EIETYHNLLEGGQEDFESSGAGK	1	1	1	CON_00019359.3		0	2.0986e+07	38.28	0.000289757	0
	High	NYSPYYNTIDDLKDQIVDLTVGNNK	1	1	1	CON_00019359.3		0	1.78469e+07	31.21	0.0031787	1
	High	MTLDDFR	1	1	1	CON_00019359.3		0	4.92788e+06	27.94	0.00353527	0
	Medium	SDLEMQYETLQEELMALK	1	1	1	CON_00019359.3		0	2.09378e+06	27.2	0.00628802	0
	Medium	TLLDIDNTR	1	1	1	CON_00019359.3		0	9.26941e+06	21.3	0.0381775	0
Cfra_5725T1	Cfra_5725T1	144.857	12.43	1	3	3	5	5.47195e+07	362	39.2676	4.03076
	A2	Sequence	# PSMs	# Proteins	# Protein Groups	Protein Group Accessions	Modifications	ΔCn	Area	IonScore	Exp Value	# Missed Cleavages
	High	ILGDLLEEcASYK	1	1	1	Cfra_5595T1	C9(Carbamidomethyl)	0	7.59603e+06	71.38	2.83834e-07	0
	High	KPDTIPK	1	1	1	Cfra_5595T1		0	9.2176e+06	40.08	0.000114592	0
	High	SPNVAALQDLLIDNLK	1	1	1	Cfra_5595T1		0	1.7952e+06	37.32	0.000528257	0
	Medium	IFTAGAVGFPGIMHLTESEGYK	1	1	1	Cfra_5595T1		0	1.87902e+07	30.53	0.0046026	0
	Medium	SPNVAALQDLLIDNLKR	1	1	1	Cfra_5595T1		0	2.00691e+06	22.37	0.0110091	1
	Medium	FAYPENPFAK	1	1	1	Cfra_5595T1		0	3.8114e+06	19	0.0314731	0
Cfra_1387T1	Cfra_1387T1	105.632	15.31	1	3	3	5	3.02698e+07	294	31.8924	7.84033
	A2	Sequence	# PSMs	# Proteins	# Protein Groups	Protein Group Accessions	Modifications	ΔCn	Area	IonScore	Exp Value	# Missed Cleavages
	High	SVAVVVADAADYYTWK	2	1	1	Cfra_0288T1		0	1.79437e+07	77.37	6.13825e-08	0
	High	ALDLDWGVAER	1	1	1	Cfra_0288T1		0	1.43671e+07	68.48	4.54098e-07	0
	High	VFLNYDILER	1	1	1	Cfra_0288T1		0	2.2869e+07	33.11	0.00168585	0
	Medium	DLLWLDGTSYWWNTHQR	1	1	1	Cfra_0288T1		0	8.65687e+06	26.41	0.00559972	0
	Medium	QYGLLIAPISSQLK	1	1	1	Cfra_0288T1		0	7.01929e+06	22.51	0.00897677	0
Cfra_4004T1	Cfra_4004T1	156.747	8.01	1	3	3	7	2.66093e+07	412	45.5678	4.76709
	A2	Sequence	# PSMs	# Proteins	# Protein Groups	Protein Group Accessions	Modifications	ΔCn	Area	IonScore	Exp Value	# Missed Cleavages
	High	AVINITDK	1	1	1	Cfra_6708T1		0	1.24978e+08	48.96	5.27288e-05	0
	High	TVVVHEGTDDFGK	1	1	1	Cfra_6708T1		0	1.16213e+08	33.29	0.00114859	0
	High	HIALSGK	1	1	1	Cfra_6708T1		0	1.12505e+08	27.81	0.00314596	0
	High	GGHDDSLTTGHAGGR	1	1	1	Cfra_6708T1		0	7.72492e+07	25.49	0.00395483	0
Cfra_6380T1	Cfra_6380T1	73.3251	17.21	1	3	4	4	2.2101e+07	308	33.1041	4.75439
	A2	Sequence	# PSMs	# Proteins	# Protein Groups	Protein Group Accessions	Modifications	ΔCn	Area	IonScore	Exp Value	# Missed Cleavages
	High	AFGGWHYVNK	2	1	1	Cfra_4004T1		0	2.9107e+07	47.27	5.15623e-05	0
	High	mAAYFDGLLSETSYPK	2	1	1	Cfra_4004T1	M1(Oxidation)	0	5.38902e+06	47.26	4.69829e-05	0
	High	VALAGYR	1	1	1	Cfra_4004T1		0	1.53757e+07	45.41	0.000100709	0
	High	MAAYFDGLLSETSYPK	2	1	1	Cfra_4004T1		0	3.53452e+07	45.4	7.35428e-05	0
Cfra_5288T1	Cfra_5288T1	99.8071	11.45	1	3	3	3	1.6745e+07	358	39.1164	6.46826
	A2	Sequence	# PSMs	# Proteins	# Protein Groups	Protein Group Accessions	Modifications	ΔCn	Area	IonScore	Exp Value	# Missed Cleavages
	High	ISVTEGSVIVR	1	1	1	Cfra_6968T1		0	1.15463e+07	38.95	0.000534871	0
	High	KWGFNDcSER	1	2	1	Cfra_6968T1	C7(Carbamidomethyl)	0	1.11809e+07	34.91	0.000376839	1
	Medium	DSTTGGASNSFVDFVWPK	1	2	1	Cfra_6968T1		0	6.34301e+06	20.4	0.0214323	0
Cfra_8100T1	Cfra_8100T1	114.764	43.52	1	3	3	4	1.42224e+07	108	10.8231	3.95459
	A2	Sequence	# PSMs	# Proteins	# Protein Groups	Protein Group Accessions	Modifications	ΔCn	Area	IonScore	Exp Value	# Missed Cleavages
	High	GEAGPAGPAGPAGPR	1	1	1	CON_00708244.1		0	5.3544e+09	58.29	6.3007e-06	0
	High	GPAGPSGPAGK	2	1	1	CON_00708244.1		0	3.9919e+07	32.13	0.00116347	0
Cfra_6586T1	Cfra_6586T1	85.5549	4.29	1	3	3	3	1.34404e+07	1118	118.537	4.36084
	A2	Sequence	# PSMs	# Proteins	# Protein Groups	Protein Group Accessions	Modifications	ΔCn	Area	IonScore	Exp Value	# Missed Cleavages
	High	VIAYLAPVYLLGK	1	1	1	Cfra_4649T1		0	4.10781e+06	44.22	4.41729e-05	0
	Medium	LSFYATR	1	1	1	Cfra_4649T1		0	5.77718e+06	26.33	0.00547101	0
Cfra_3621T1	Cfra_3621T1	199.578	38.82	1	3	3	9	1.23434e+07	170	18.093	4.43701
	A2	Sequence	# PSMs	# Proteins	# Protein Groups	Protein Group Accessions	Modifications	ΔCn	Area	IonScore	Exp Value	# Missed Cleavages
	High	GGGTAQVLSAWYHER	1	1	1	Cfra_7455T1		0	1.23622e+07	37.87	0.000530742	0
	Medium	VPDSILGYK	1	1	1	Cfra_7455T1		0	1.30939e+07	19.8	0.0507857	0
Cfra_3500T1	Cfra_3500T1	90.5037	7.45	1	3	3	3	1.01646e+07	685	73.7952	6.48096
	A2	Sequence	# PSMs	# Proteins	# Protein Groups	Protein Group Accessions	Modifications	ΔCn	Area	IonScore	Exp Value	# Missed Cleavages
	High	TTGQLcVPFSDTSLMK	1	1	1	Cfra_3721T1	C6(Carbamidomethyl)	0	3.43584e+07	28.51	0.00387554	0
	Medium	TTGQLcVPFSDTSLmK	1	1	1	Cfra_3721T1	C6(Carbamidomethyl); M15(Oxidation)	0	4.02478e+06	26.85	0.00454384	0
	Medium	VLPLGLSDLQATLcNLKK	1	1	1	Cfra_3721T1	C14(Carbamidomethyl)	0	3.6767e+07	16.09	0.033215	1
Cfra_6968T1	Cfra_6968T1	67.1691	10.89	2	3	3	3	9.69007e+06	358	38.9856	5.56689
	A2	Sequence	# PSMs	# Proteins	# Protein Groups	Protein Group Accessions	Modifications	ΔCn	Area	IonScore	Exp Value	# Missed Cleavages
	High	ESTLHLVLR	2	5	2	CON_00726431.1;Cfra_2780T1		0	1.10277e+08	48.83	2.68382e-05	0
	Medium	TITLEVEPSDTIENVK	1	1	1	CON_00726431.1		0	7.29663e+06	24.34	0.0191427	0
Cfra_4708T1	Cfra_4708T1	61.6413	5.52	1	3	3	4	7.42866e+06	435	47.3889	4.23389
	A2	Sequence	# PSMs	# Proteins	# Protein Groups	Protein Group Accessions	Modifications	ΔCn	Area	IonScore	Exp Value	# Missed Cleavages
	Medium	NQILAVK	1	2	1	Cfra_2539T1		0	7.98187e+06	22.93	0.00993195	0
Cfra_7776T1	Cfra_7776T1	79.6404	14.43	2	3	3	3	6.72758e+06	298	32.4225	6.87354
	A2	Sequence	# PSMs	# Proteins	# Protein Groups	Protein Group Accessions	Modifications	ΔCn	Area	IonScore	Exp Value	# Missed Cleavages
	Medium	KWAEER	1	1	1	Cfra_7641T1		0	8.39914e+06	22.95	0.0190122	1
Cfra_2026T1	Cfra_2026T1	104.937	7.49	1	3	3	4	4.22488e+06	307	34.6208	4.90674
	A2	Sequence	# PSMs	# Proteins	# Protein Groups	Protein Group Accessions	Modifications	ΔCn	Area	IonScore	Exp Value	# Missed Cleavages
	Medium	sGSFWGLVVEPGNK	1	1	1	Cfra_0261T1	N-Term(Acetyl)	0	1.26332e+06	28.76	0.00478964	0
Cfra_6016T1	Cfra_6016T1	75.2137	21.55	1	3	3	3	3.49848e+06	232	26.5712	4.91943
	A2	Sequence	# PSMs	# Proteins	# Protein Groups	Protein Group Accessions	Modifications	ΔCn	Area	IonScore	Exp Value	# Missed Cleavages
	High	GNNPFGEIDDETTTK	1	1	1	Cfra_0645T1		0	2.42495e+07	64.92	4.8316e-07	0
Cfra_6243T1	Cfra_6243T1	873.932	56.18	3	2	11	30	4.10952e+09	283	30.0584	6.0874
	A2	Sequence	# PSMs	# Proteins	# Protein Groups	Protein Group Accessions	Modifications	ΔCn	Area	IonScore	Exp Value	# Missed Cleavages
	High	NDDISSGVQVGIVSWSSR	2	1	1	Cfra_4765T1		0	2.08405e+07	79.74	4.61838e-08	0
	High	SGFAEVVLHPELSR	2	1	1	Cfra_4765T1		0	3.73739e+07	59.36	3.8819e-06	0
	High	GMAEVSSHTAYIGMITK	1	1	1	Cfra_4765T1		0	1.79982e+07	59.17	5.32663e-06	0
	High	DWVLTAGHcVR	2	1	1	Cfra_4765T1	C9(Carbamidomethyl)	0	2.34956e+07	57.53	6.09283e-06	0
	High	GDSGGPLILPGKNDDISSGVQVGIVSWSSR	2	1	1	Cfra_4765T1		0	4.06752e+07	53.89	1.42912e-05	1
	High	FPLLNDIALIR	2	1	1	Cfra_4765T1		0	5.72742e+07	52.83	1.12057e-05	0
	High	VSSYIDWIK	1	1	1	Cfra_4765T1		0	8.14539e+07	52.38	1.24291e-05	0
	High	LWYAGWGR	1	1	1	Cfra_4765T1		0	69597590	47.35	8.92774e-05	0
	High	RGMAEVSSHTAYIGMITK	1	1	1	Cfra_4765T1		0	1.95595e+07	35.98	0.000996775	1
	High	LKDPAPK	1	1	1	Cfra_4765T1		0	9.59539e+07	28.18	0.00177483	1
	Medium	HYcGGTLIAK	1	1	1	Cfra_4765T1	C3(Carbamidomethyl)	0	6.19416e+07	25.7	0.0098241	0
	Medium	IVGGAPVAK	1	2	1	Cfra_4765T1		0	4.39847e+07	23.74	0.00493351	0
	Medium	DSVFVSLNENK	1	1	1	Cfra_4765T1		0	4.49412e+07	17.97	0.0566537	0
	Medium	GDSGGPLILPGK	1	1	1	Cfra_4765T1		0	7.963e+07	16.09	0.0442866	0
CON_00708244.1	SWISS-PROT:P02465 ENSEMBL:ENSBTAP00000033771 REFSEQ:NP_776945 (Bos taurus) Gene_Symbol=COL1A2 Collagen alpha-2(I) chain	82.2137	1.91	1	2	2	3	2.69716e+09	1364	128.985	9.14404
	A2	Sequence	# PSMs	# Proteins	# Protein Groups	Protein Group Accessions	Modifications	ΔCn	Area	IonScore	Exp Value	# Missed Cleavages
	High	VNASLLNLHK	2	1	1	Cfra_4547T1		0	1.24944e+08	62.91	6.39602e-07	0
	High	ELADLITNLK	1	1	1	Cfra_4547T1		0	2.2821e+08	54.15	1.57683e-05	0
	High	RVGGDSLGLYLFDQQLHK	1	1	1	Cfra_4547T1		0	1.00577e+08	49.88	4.16347e-05	1
	High	VGGDSLGLYLFDQQLHK	1	1	1	Cfra_4547T1		0	5.8251e+07	49.7	4.98256e-05	0
	High	ELADLITNLKR	2	1	1	Cfra_4547T1		0	1.23752e+08	42.76	0.000105933	1
	High	TAEENNDAQMTDFIDDFLLEQVNAQK	1	1	1	Cfra_4547T1		0	1.20929e+08	36.87	0.000421458	0
	High	SSEEEHEHAQSFIDYQNK	1	1	1	Cfra_4547T1		0	2.7794e+07	33.03	0.000580973	0
	High	SSEEEHEHAQSFIDYQNKR	1	1	1	Cfra_4547T1		0	1.47444e+07	28.81	0.00197284	1
	Medium	DDVALPGFR	1	1	1	Cfra_4547T1		0	91404496	27.81	0.00612635	0
	Medium	VGGDSLGLYLFDQQLHKKD	2	1	1	Cfra_4547T1		0	8.23826e+06	27.78	0.00983676	2
	Medium	VGGDSLGLYLFDQQLHKK	1	1	1	Cfra_4547T1		0	6.34883e+06	24.87	0.0171064	1
	Medium	TAEENNDAQmTDFIDDFLLEQVNAQK	1	1	1	Cfra_4547T1	M10(Oxidation)	0	2.33622e+07	24.17	0.00727367	0
	Medium	KSSEEEHEHAQSFIDYQNK	1	1	1	Cfra_4547T1		0	2.93451e+07	20.11	0.0136499	1
	Medium	QNFASASENHINDQINVELTAAYHYLSAAAYFNR	1	1	1	Cfra_4547T1		0	6.1561e+07	19.52	0.0346228	0
Cfra_2780T1	Cfra_2780T1	145.379	44.62	4	2	3	4	1.31387e+08	381	42.5699	7.57666
	A2	Sequence	# PSMs	# Proteins	# Protein Groups	Protein Group Accessions	Modifications	ΔCn	Area	IonScore	Exp Value	# Missed Cleavages
	High	WYEGGYQcSSQEYIDVEK	1	1	1	Cfra_7087T1	C8(Carbamidomethyl)	0	1.23256e+07	83.14	5.66443e-09	0
	High	ANQGGAVNVQGVLGNMIIDGFYR	2	1	1	Cfra_7087T1		0	14813062	78.06	6.17443e-08	0
	High	AVLVADFDSPTGAILEATNPEEQVVR	3	1	1	Cfra_7087T1		0	1.08178e+08	71.73	3.02143e-07	0
	High	DLGLSNIYDFNGER	1	1	1	Cfra_7087T1		0	4.15542e+07	59.53	2.34002e-06	0
	High	YAGGAAIAVIYLPFER	3	1	1	Cfra_7087T1		0	9.7763e+07	51.28	2.19696e-05	0
	High	FTGVTcGGGDVER	1	1	1	Cfra_7087T1	C6(Carbamidomethyl)	0	4.53332e+07	50.45	1.71299e-05	0
	High	ENEAIDDGYGSR	1	1	1	Cfra_7087T1		0	3.19071e+07	35.96	0.000295907	0
	High	ILQLFEQSYVK	1	1	1	Cfra_7087T1		0	1.77546e+08	30.77	0.00175881	0
	Medium	GGVVATNMHDYGSVLEFDGVFQSNVATTVGGVLSR	2	1	1	Cfra_7087T1		0	1.66101e+07	25.56	0.0108409	0
	Medium	IEYLAITTNEEK	1	1	1	Cfra_7087T1		0	9.71792e+07	21.27	0.0276186	0
	Medium	SDTYSEAEWSER	1	1	1	Cfra_7087T1		0	1.38994e+07	13.22	0.0556104	0
Cfra_3721T1	Cfra_3721T1	43.938	6.49	1	2	2	3	3.55627e+07	524	56.9214	4.89404
	A2	Sequence	# PSMs	# Proteins	# Protein Groups	Protein Group Accessions	Modifications	ΔCn	Area	IonScore	Exp Value	# Missed Cleavages
	High	ASTIEGEYYPALTSDEWSK	1	1	1	Cfra_1829T1		0	7.70631e+06	42.23	0.000107714	0
	High	AFWWEGK	1	1	1	Cfra_1829T1		0	3329797	37.26	0.000535605	0
	Medium	LTLSEGESWVYPTK	1	1	1	Cfra_1829T1		0	7.11468e+06	29.62	0.00485691	0
	High	LNVEFAQYVLFPSVK	1	1	1	Cfra_1829T1		0	3.16764e+06	29.28	0.00300982	0
	Medium	DFQTQLNIENSEWDIR	1	1	1	Cfra_1829T1		0	3.08187e+06	20.13	0.0242627	0
Cfra_7846T1	Cfra_7846T1	75.5691	16.74	1	2	3	3	2.91471e+07	221	22.7065	4.36084
	A2	Sequence	# PSMs	# Proteins	# Protein Groups	Protein Group Accessions	Modifications	ΔCn	Area	IonScore	Exp Value	# Missed Cleavages
	High	LGEHNIDVLEGNEQFINAAK	2	1	1	CON_Trypsin		0	8.7105e+07	80.84	3.91466e-08	0
	High	VATVSLPR	2	1	1	CON_Trypsin		0	17477916846	55.37	5.80805e-06	0
	High	VcNYVNWIQQTIAAN	1	1	1	CON_Trypsin	C2(Carbamidomethyl)	0	4.27248e+06	38.06	0.000437681	0
	Medium	IITHPNFNGNTLDNDIMLIK	2	1	1	CON_Trypsin		0	1.28722e+07	24.37	0.0166346	0
Cfra_4512T1	Cfra_4512T1	56.7289	7.87	1	2	2	3	2.17903e+07	254	27.464	5.10986
	A2	Sequence	# PSMs	# Proteins	# Protein Groups	Protein Group Accessions	Modifications	ΔCn	Area	IonScore	Exp Value	# Missed Cleavages
	High	VVDSNSDINPK	1	1	1	Cfra_6586T1		0	2.00065e+07	50.8	2.03782e-05	0
	High	DTPELSDSDDDEANPPLTLLALGIGQVEIK	1	1	1	Cfra_6586T1		0	5.81367e+06	39.8	0.0005288	0
	Medium	VTLEATK	1	1	1	Cfra_6586T1		0	1.45011e+07	26.68	0.00783958	0
Cfra_3042T1	Cfra_3042T1	65.9419	6.07	1	2	2	2	1.57312e+07	461	50.0157	5.09717
	A2	Sequence	# PSMs	# Proteins	# Protein Groups	Protein Group Accessions	Modifications	ΔCn	Area	IonScore	Exp Value	# Missed Cleavages
	High	DWVLTAAHcLDDVHNSFWNK	1	1	1	Cfra_7776T1	C9(Carbamidomethyl)	0	9.3623e+06	40.57	0.00018417	0
	High	VSSYIDWIEK	1	2	1	Cfra_7776T1		0	8.37623e+06	35.73	0.000908822	0
	High	KLSYITIGMTSLK	1	1	1	Cfra_7776T1		0	2.44419e+06	31.31	0.00129431	1
Cfra_0155T1	Cfra_0155T1	104.155	7.43	1	2	2	2	1.51638e+07	296	31.5815	5.41455
	A2	Sequence	# PSMs	# Proteins	# Protein Groups	Protein Group Accessions	Modifications	ΔCn	Area	IonScore	Exp Value	# Missed Cleavages
	High	AFSVFLFNSEGK	1	1	1	Cfra_6016T1		0	2.5489e+06	45.66	0.000107299	0
	High	TGSVPVEAFEFLTR	1	1	1	Cfra_6016T1		0	4.49583e+06	33.17	0.00178321	0
	Medium	IQYLAASDGQWGEHEIDYILFAQR	1	1	1	Cfra_6016T1		0	3.45071e+06	27.02	0.0063555	0
Cfra_1862T1	Cfra_1862T1	76.7737	13.19	1	2	2	3	1.41194e+07	288	31.3153	4.32275
	A2	Sequence	# PSMs	# Proteins	# Protein Groups	Protein Group Accessions	Modifications	ΔCn	Area	IonScore	Exp Value	# Missed Cleavages
	High	VTMQNLNDR	1	13	4	CON_00009865.2;CON_00217963.3;CON_00384444.5;CON_00721270.3		0	1.12656e+07	47.62	8.13014e-05	0
	High	TDLEMQIEGLKEELAYLR	1	1	1	CON_00217963.3		0	2.69181e+06	41.29	0.000367794	1
	High	DAETWFLSK	1	1	1	CON_00217963.3		0	4.0138e+06	40.52	0.000221789	0
	Medium	LAADDFR	1	36	4	CON_00009865.2;CON_00217963.3;CON_00384444.5;CON_00721270.3		0	1.14834e+07	29.16	0.00764435	0
Cfra_7455T1	Cfra_7455T1	43.3519	8.89	1	2	2	2	1.2728e+07	270	29.6383	5.66846
	A2	Sequence	# PSMs	# Proteins	# Protein Groups	Protein Group Accessions	Modifications	ΔCn	Area	IonScore	Exp Value	# Missed Cleavages
	High	IVLHSGYNSNSMANDIAMIR	3	1	1	Cfra_6243T1		0	2.5097e+07	88.59	4.7733e-09	0
	High	GKDScQGDSGGPVVAPGSDGR	2	3	3	Cfra_6234T1;Cfra_6243T1;Cfra_7376T1	C5(Carbamidomethyl)	0	7.81891e+08	67.89	2.03194e-07	1
	High	DWVVTAAHcLYGR	2	6	4	Cfra_6234T1;Cfra_6243T1;Cfra_7376T1;Cfra_6582T1	C9(Carbamidomethyl)	0	9.24528e+08	61.78	2.09079e-06	0
	High	LVGIVSWGQGcAR	1	3	3	Cfra_6234T1;Cfra_6243T1;Cfra_7376T1	C11(Carbamidomethyl)	0	1.26854e+09	61.02	3.75572e-06	0
	High	IGMTTQSGNDYmHK	4	3	3	Cfra_6234T1;Cfra_6243T1;Cfra_7376T1	M12(Oxidation)	0	5.86794e+08	57.72	1.97313e-06	0
	High	IGMTTQSGNDYMHK	2	3	3	Cfra_6234T1;Cfra_6243T1;Cfra_7376T1		0	2.70543e+09	54.63	5.16525e-06	0
	High	IVGGVPVTER	1	3	3	Cfra_6234T1;Cfra_6243T1;Cfra_7376T1		0	4.93134e+09	50.83	1.19776e-05	0
	High	VSSFISWMDDTmANN	2	1	1	Cfra_6243T1	M12(Oxidation)	0	4.55137e+07	50.1	1.14066e-05	0
	High	VSSSYSHQLK	1	5	4	Cfra_6234T1;Cfra_6243T1;Cfra_7376T1;Cfra_6582T1		0	4.69177e+09	49.66	3.73095e-05	0
	High	IVLHSGYNSNSMANDIAmIR	4	1	1	Cfra_6243T1	M18(Oxidation)	0	5.51113e+07	46.18	7.47071e-05	0
	High	VSSFISWMDDTMANN	1	1	1	Cfra_6243T1		0	3.60551e+08	39.1	0.0001436	0
	High	RGYPGVNTR	2	4	4	Cfra_6234T1;Cfra_6243T1;Cfra_7376T1;Cfra_6582T1		0	2.65222e+09	38.4	0.000390269	1
	High	IPFMVSLNDPTWGSNGFHYcGGSLINK	1	3	3	Cfra_6234T1;Cfra_6243T1;Cfra_7376T1	C20(Carbamidomethyl)	0	1.29451e+08	35.82	0.000785455	0
	High	IPFmVSLNDPTWGSNGFHYcGGSLINK	1	3	3	Cfra_6234T1;Cfra_6243T1;Cfra_7376T1	M4(Oxidation); C20(Carbamidomethyl)	0	1.87141e+07	34.09	0.00120882	0
	High	NVcTYTR	1	3	3	Cfra_6234T1;Cfra_6243T1;Cfra_7376T1	C3(Carbamidomethyl)	0	3.41515e+08	27.72	0.00197313	0
	High	IGmTTQSGNDYmHK	2	3	3	Cfra_6234T1;Cfra_6243T1;Cfra_7376T1	M3(Oxidation); M12(Oxidation)	0	1.06334e+08	25.61	0.00320742	0
Cfra_8260T1	Cfra_8260T1	150.126	9.09	2	2	2	4	1.03297e+07	286	31.053	4.77979
	A2	Sequence	# PSMs	# Proteins	# Protein Groups	Protein Group Accessions	Modifications	ΔCn	Area	IonScore	Exp Value	# Missed Cleavages
	High	FAPASSTSSEYLVGWTENDSAYK	2	1	1	Cfra_2380T1		0	9.16595e+06	36.34	0.000429706	0
	Medium	VAAELGGVALAGASWR	1	1	1	Cfra_2380T1		0	5.089e+06	18.26	0.0440374	0
CON_00217963.3	SWISS-PROT:P08779 Tax_Id=9606 Gene_Symbol=KRT16 Keratin, type I cytoskeletal 16	103.128	9.09	27	2	4	4	8.92094e+06	473	51.2362	5.04639
	A2	Sequence	# PSMs	# Proteins	# Protein Groups	Protein Group Accessions	Modifications	ΔCn	Area	IonScore	Exp Value	# Missed Cleavages
	High	VTMQNLNDR	1	13	4	CON_00009865.2;CON_00217963.3;CON_00384444.5;CON_00721270.3		0	1.12656e+07	47.62	8.13014e-05	0
	High	DAEDWFFSK	1	4	1	CON_00721270.3		0	1.82154e+06	47.39	2.1289e-05	0
	Medium	LAADDFR	1	36	4	CON_00009865.2;CON_00217963.3;CON_00384444.5;CON_00721270.3		0	1.14834e+07	29.16	0.00764435	0
Cfra_6386T1	Cfra_6386T1	62.5719	11.81	1	2	2	2	8.18644e+06	254	26.8988	6.58057
	A2	Sequence	# PSMs	# Proteins	# Protein Groups	Protein Group Accessions	Modifications	ΔCn	Area	IonScore	Exp Value	# Missed Cleavages
	Medium	LQDSIK	1	1	1	Cfra_2768T1		0	8.25743e+06	25.89	0.0213835	0
Cfra_2380T1	Cfra_2380T1	43.9671	7.44	1	2	2	3	7.12748e+06	524	56.9017	4.85596
	A2	Sequence	# PSMs	# Proteins	# Protein Groups	Protein Group Accessions	Modifications	ΔCn	Area	IonScore	Exp Value	# Missed Cleavages
	High	NDVALLR	1	2	2	Cfra_3159T1;Cfra_7221T1		0	3.91558e+07	39.88	0.000349526	0
	High	IGMTSQSADDYLHK	3	1	1	Cfra_7221T1		0	227492590	31.87	0.00143029	0
	Medium	IGmTSQSADDYLHK	1	1	1	Cfra_7221T1	M3(Oxidation)	0	47652209	22.25	0.0113176	0
Cfra_4649T1	Cfra_4649T1	56.0304	3.26	1	2	2	2	4.94249e+06	614	68.8241	5.13525
	A2	Sequence	# PSMs	# Proteins	# Protein Groups	Protein Group Accessions	Modifications	ΔCn	Area	IonScore	Exp Value	# Missed Cleavages
	High	YILDFTDSLK	1	1	1	Cfra_7648T1		0	4.43896e+06	44.75	0.000108864	0
Cfra_6434T1	Cfra_6434T1	31.9252	14.63	1	2	2	2	4.92411e+06	205	22.7266	6.52197
	A2	Sequence	# PSMs	# Proteins	# Protein Groups	Protein Group Accessions	Modifications	ΔCn	Area	IonScore	Exp Value	# Missed Cleavages
	High	TNWNIAALLAK	1	1	1	Cfra_7251T1		0	2.98626e+06	70.2	3.91547e-07	0
Cfra_4548T1	Cfra_4548T1	98.7179	6.54	2	2	2	2	4.69996e+06	306	34.5822	4.06885
	A2	Sequence	# PSMs	# Proteins	# Protein Groups	Protein Group Accessions	Modifications	ΔCn	Area	IonScore	Exp Value	# Missed Cleavages
	High	YTFLQFDPAPR	1	1	1	Cfra_2040T1		0	2.59214e+06	30.77	0.00280572	0
Cfra_0852T1	Cfra_0852T1	68.7119	7.42	1	2	2	2	4.24636e+06	458	49.626	6.55127
	A2	Sequence	# PSMs	# Proteins	# Protein Groups	Protein Group Accessions	Modifications	ΔCn	Area	IonScore	Exp Value	# Missed Cleavages
	High	DKAELEALIAALEK	1	1	1	Cfra_0952T1		0	2.00383e+06	45.2	7.09689e-05	1
Cfra_6096T1	Cfra_6096T1	73.3509	22.58	1	2	2	2	3.79978e+06	155	16.4536	7.54736
	A2	Sequence	# PSMs	# Proteins	# Protein Groups	Protein Group Accessions	Modifications	ΔCn	Area	IonScore	Exp Value	# Missed Cleavages
	High	TQIGNLDKVESFVK	1	1	1	Cfra_2549T1		0	2.64565e+06	43.16	0.000147333	1
Cfra_0839T1	Cfra_0839T1	33.6961	3.12	1	2	2	2	3.47393e+06	705	77.9613	4.65283
	A2	Sequence	# PSMs	# Proteins	# Protein Groups	Protein Group Accessions	Modifications	ΔCn	Area	IonScore	Exp Value	# Missed Cleavages
	High	DDITGcVAVVQVIDR	2	1	1	Cfra_7075T1	C6(Carbamidomethyl)	0	3.29352e+07	72.03	1.84851e-07	0
Cfra_1166T1	Cfra_1166T1	56.1852	4.04	1	2	2	2	3.40283e+06	495	53.5888	6.23975
	A2	Sequence	# PSMs	# Proteins	# Protein Groups	Protein Group Accessions	Modifications	ΔCn	Area	IonScore	Exp Value	# Missed Cleavages
	High	SALTVQFVQGIFVEK	1	2	1	Cfra_1194T1		0	2.82756e+06	32.27	0.00154161	0
CON_00708398.1	SWISS-PROT:P02769 (Bos taurus) Bovine serum albumin precursor	63.3119	3.95	2	2	2	2	3.17104e+06	607	69.2484	6.17627
	A2	Sequence	# PSMs	# Proteins	# Protein Groups	Protein Group Accessions	Modifications	ΔCn	Area	IonScore	Exp Value	# Missed Cleavages
	High	NQQLLQEIESLEDR	1	1	1	Cfra_6331T1		0	3.07193e+06	84.25	1.40939e-08	0
Cfra_5812T1	Cfra_5812T1	28.6236	13.64	1	2	2	2	2.9668e+06	220	24.6916	5.2749
	A2	Sequence	# PSMs	# Proteins	# Protein Groups	Protein Group Accessions	Modifications	ΔCn	Area	IonScore	Exp Value	# Missed Cleavages
	High	MGQPITAcGNNLIAGTVK	1	1	1	Cfra_3377T1	C8(Carbamidomethyl)	0	4.95732e+06	38.79	0.000541731	0
Cfra_6234T1	Cfra_6234T1	1132.88	59.12	3	1	12	36	4.27953e+09	296	31.6821	6.52197
	A2	Sequence	# PSMs	# Proteins	# Protein Groups	Protein Group Accessions	Modifications	ΔCn	Area	IonScore	Exp Value	# Missed Cleavages
	High	YTLAASGQIYDIDGSSLDATK	3	1	1	Cfra_4775T1		0	1.30381e+07	104.11	1.61082e-10	0
	High	DSVVVGSVSLGDWFIR	1	1	1	Cfra_4775T1		0	1.10388e+07	56.61	9.82228e-06	0
	High	TSTIEFENAPSFIDYGPADNR	2	1	1	Cfra_4775T1		0	3.04381e+07	49	2.83258e-05	0
	High	TYSLGSAVLNK	1	1	1	Cfra_4775T1		0	3.84573e+07	42.43	0.000174301	0
	High	TSYDSTNWMWSISAEK	1	1	1	Cfra_4775T1		0	1.96697e+07	32.5	0.000702927	0
	High	HAFVGGSAGSR	1	1	1	Cfra_4775T1		0	1.7218e+07	29.48	0.00264891	0
	High	NIAHVPTLLISYER	3	1	1	Cfra_4775T1		0	5.08774e+07	28.66	0.00381205	0
	Medium	SEKDEIGNK	2	1	1	Cfra_4775T1		0	0	25.89	0.00863068	1
	Medium	LEQWK	1	1	1	Cfra_4775T1		0	15068986	25.58	0.01674	0
	Medium	DGITFR	1	1	1	Cfra_4775T1		0	1.14795e+07	23.69	0.0177439	0
	Medium	MEELGSITSPR	1	1	1	Cfra_4775T1		0	1.37633e+07	22.54	0.0178299	0
	Medium	IVALNDK	1	1	1	Cfra_4775T1		0	1.76371e+07	22.47	0.0203846	0
	Medium	GYIANVDcR	1	1	1	Cfra_4775T1	C8(Carbamidomethyl)	0	9945361	22.31	0.00939983	0
	Medium	QEQWMITAWGTSGQVLK	1	1	1	Cfra_4775T1		0	3.755e+06	21.68	0.028187	0
	Medium	IVDEDFK	1	1	1	Cfra_4775T1		0	1.15404e+07	21.22	0.0173671	0
	Medium	SAGAYDSITR	1	1	1	Cfra_4775T1		0	20191934	20.51	0.0168948	0
	Medium	TVINIDGcVAPDKDLTQIK	1	1	1	Cfra_4775T1	C8(Carbamidomethyl)	0	2.83e+06	18.6	0.0559056	1
	Medium	TVRPVFER	1	1	1	Cfra_4775T1		0	23831563	18.21	0.057383	0
	Medium	GDWEEQAK	1	1	1	Cfra_4775T1		0	1.00802e+07	13.8	0.0486582	0
Cfra_7376T1	Cfra_7376T1	1458.88	58.53	3	1	12	44	4.27953e+09	299	31.9274	6.52197
	A2	Sequence	# PSMs	# Proteins	# Protein Groups	Protein Group Accessions	Modifications	ΔCn	Area	IonScore	Exp Value	# Missed Cleavages
	High	MPAYNLDLVDITAEGFK	2	1	1	Cfra_8133T1		0	2.33823e+07	71.04	3.14818e-07	0
	High	NSASDGGAIHIAR	2	1	1	Cfra_8133T1		0	41417716	65.41	1.07902e-06	0
	High	SKEYDEDEEEASDR	3	1	1	Cfra_8133T1		0	1.76594e+07	63.96	4.68982e-07	1
	High	mPAYNLDLVDITAEGFK	1	1	1	Cfra_8133T1	M1(Oxidation)	0	4.88481e+06	63.37	1.4268e-06	0
	High	VDVLDSQFFR	1	1	1	Cfra_8133T1		0	2.35283e+07	54.01	1.31073e-05	0
	High	GGSAIFLQVAK	2	1	1	Cfra_8133T1		0	5.25219e+07	47.09	6.74247e-05	0
	High	KFDAIFHVGGR	2	1	1	Cfra_8133T1		0	2.74688e+07	38.85	0.000632036	1
	High	YIHGTVNIDGYYIGNEASEGR	1	1	1	Cfra_8133T1		0	2.4759e+07	35.89	0.000669844	0
	High	NPNYAIK	1	1	1	Cfra_8133T1		0	1.26255e+07	34.57	0.00167587	0
	High	TGAYVGSR	1	1	1	Cfra_8133T1		0	4.67532e+06	34.49	0.000622355	0
	High	DDTSYHIEGIDFENAK	2	1	1	Cfra_8133T1		0	2.13719e+07	33.39	0.000572677	0
	High	KVNIVK	1	1	1	Cfra_8133T1		0	7.94969e+06	26.88	0.00389721	1
	Medium	NTVADPGKEYYGGGGAVWIHEVPTGNSVTIEK	1	1	1	Cfra_8133T1		0	7.80537e+06	24.4	0.0154308	1
	Medium	GLIANNR	1	1	1	Cfra_8133T1		0	2.02567e+07	23.11	0.00708546	0
	Medium	NTVADPGK	2	1	1	Cfra_8133T1		0	1.53841e+06	21.37	0.0124008	0
	Medium	EYYGGGGAVWIHEVPTGNSVTIEK	1	1	1	Cfra_8133T1		0	1.808e+07	21.03	0.0291878	0
	Medium	AGTLLFNNVSVK	1	1	1	Cfra_8133T1		0	5.26051e+07	20.56	0.0228546	0
Cfra_3499T1	Cfra_3499T1	159.556	11.26	1	1	2	3	4.71578e+08	222	22.9866	4.03076
	A2	Sequence	# PSMs	# Proteins	# Protein Groups	Protein Group Accessions	Modifications	ΔCn	Area	IonScore	Exp Value	# Missed Cleavages
	High	IFITPSSNPDGYEYTFTATEDNPEPR	3	1	1	Cfra_7050T1		0	2.42019e+08	71.27	1.4929e-07	0
	High	EWISPASAmFAIDQLVLK	5	1	1	Cfra_7050T1	M9(Oxidation)	0	1.04654e+07	63.04	2.38364e-06	0
	High	VYTVSTSTDFYPASGAmDDWLYDHVASVAK	3	1	1	Cfra_7050T1	M17(Oxidation)	0	2.15853e+07	58	3.16979e-06	0
	High	VYTVSTSTDFYPASGAMDDWLYDHVASVAK	2	1	1	Cfra_7050T1		0	2.47352e+08	48.59	3.45892e-05	0
	High	FSDASTmSK	1	1	1	Cfra_7050T1	M7(Oxidation)	0	4.91488e+06	44.92	3.75972e-05	0
	High	SYNEIVER	1	1	1	Cfra_7050T1		0	113672981	44.9	9.54601e-05	0
	High	TPSFLQTTR	1	1	1	Cfra_7050T1		0	1.14709e+08	44.82	0.00014338	0
	High	FSDASTMSK	2	1	1	Cfra_7050T1		0	6.38804e+07	41.06	9.14441e-05	0
	High	KGDVLYVIR	1	1	1	Cfra_7050T1		0	5.30733e+07	40.88	0.000167399	1
	High	VYTVSTSTDFYPASGAMDDWLYDHVASVAKDEK	2	1	1	Cfra_7050T1		0	9.98787e+06	35.9	0.000565487	1
	High	GDVLYVIR	1	1	1	Cfra_7050T1		0	2.79453e+07	35.27	0.000861783	0
	High	AHVENIK	2	1	1	Cfra_7050T1		0	4.42788e+07	34.26	0.00056246	0
	High	LYSVANDNEQVSIVQLPGFSYEGR	2	1	1	Cfra_7050T1		0	2.00009e+07	30.18	0.00450918	0
	Medium	ITGVAIGNPNAPMAVYMNcGIHAR	1	1	1	Cfra_7050T1	C19(Carbamidomethyl)	0	3.713e+07	23.91	0.0168674	0
	High	HMYPDEGQSEK	1	1	1	Cfra_7050T1		0	6.09433e+07	22.7	0.00626839	0
Cfra_7221T1	Cfra_7221T1	86.9274	7.05	1	1	2	5	1.33324e+08	298	31.9556	5.57959
	A2	Sequence	# PSMs	# Proteins	# Protein Groups	Protein Group Accessions	Modifications	ΔCn	Area	IonScore	Exp Value	# Missed Cleavages
	High	IDQTSWANVAYVAGHSWSK	4	1	1	Cfra_1091T1		0	2.19973e+08	76.23	8.45723e-08	0
	High	STGSVDLIDATGTK	1	1	1	Cfra_1091T1		0	9.3758e+07	51.02	3.36038e-05	0
	High	NRPVYDDDSFSGMGEGISMFEAR	1	1	1	Cfra_1091T1		0	1.70636e+07	42.28	6.90488e-05	0
	High	VGSITNIR	1	1	1	Cfra_1091T1		0	8.17369e+06	36.59	0.00130472	0
	High	STQNcVVK	1	1	1	Cfra_1091T1	C5(Carbamidomethyl)	0	9.08153e+06	33.75	0.00141268	0
	High	APWDYSGVR	1	1	1	Cfra_1091T1		0	2.9941e+07	31.72	0.00211988	0
	High	VMEDFHSLR	2	1	1	Cfra_1091T1		0	3.46628e+07	27.99	0.00389194	0
	Medium	VHTVFEQFK	1	1	1	Cfra_1091T1		0	5.70473e+07	27.48	0.00759257	0
	Medium	FWEPKPEDLISTFK	2	1	1	Cfra_1091T1		0	4.94939e+07	26.6	0.00984493	0
	Medium	TTEcWVTLYTVDTVR	1	1	1	Cfra_1091T1	C4(Carbamidomethyl)	0	5.28228e+06	21.98	0.0206008	0
	Medium	RFDLDNVATWMAVNIMcGDTDHNGK	1	1	1	Cfra_1091T1	C17(Carbamidomethyl)	0	6.08557e+06	21.02	0.0126509	1
CON_00726431.1	REFSEQ:XP_879643 (Bos taurus) Gene_Symbol=UBC ubiquitin C isoform 12	62.3418	32.61	1	1	2	3	5.87868e+07	690	77.5228	7.66455
	A2	Sequence	# PSMs	# Proteins	# Protein Groups	Protein Group Accessions	Modifications	ΔCn	Area	IonScore	Exp Value	# Missed Cleavages
	High	LVFFVWAPDTAK	1	1	1	Cfra_3337T1		0	4.45452e+07	47.03	7.62888e-05	0
	High	aSGVAVSDQVVQIYDSIK	1	1	1	Cfra_3337T1	N-Term(Acetyl)	0	2.56353e+07	45.29	0.000127195	0
	High	ISDDNSQIEVVK	1	1	1	Cfra_3337T1		0	17138468	42.4	0.000221544	0
	High	MLIASSK	1	1	1	Cfra_3337T1		0	9.14934e+06	36.69	0.000675011	0
	Medium	TAEPTATYDDFLEELPSDDcR	1	1	1	Cfra_3337T1	C20(Carbamidomethyl)	0	4.56425e+06	19.21	0.0140009	0
	Medium	YAVYDFDYTSK	1	1	1	Cfra_3337T1		0	1.74509e+07	16.06	0.0289172	0
Cfra_1840T1	Cfra_1840T1	50.81	6.07	1	1	1	1	4.02667e+07	494	54.1977	4.57666
	A2	Sequence	# PSMs	# Proteins	# Protein Groups	Protein Group Accessions	Modifications	ΔCn	Area	IonScore	Exp Value	# Missed Cleavages
	High	TSTAGSTSSYIAQAWVLK	1	1	1	Cfra_4754T1		0	7.50906e+06	80.01	2.79356e-08	0
	High	TMSAAVLSDLQAGFLK	1	1	1	Cfra_4754T1		0	7.40358e+06	63.06	1.73009e-06	0
	High	IGIEAITLAALQK	1	1	1	Cfra_4754T1		0	1.38257e+07	62.93	5.94505e-07	0
	High	TLNDYEAIATFGESPSHAVVSSK	2	1	1	Cfra_4754T1		0	2.18792e+07	36.29	0.000951601	0
	Medium	LAANEVDIVEADMVTLEPK	2	1	1	Cfra_4754T1		0	8.12935e+06	26.64	0.00802051	0
	Medium	EGSASFADADAGATVAYLDELESVAVEK	1	1	1	Cfra_4754T1		0	2.06046e+06	20.94	0.0193291	0
CON_00710056.3	ENSEMBL:ENSBTAP00000038799 REFSEQ:XP_583270 (Bos taurus) Gene_Symbol=APOB apolipoprotein B	19.83	0.13	1	1	1	1	38224746	4575	515.946	6.78564
	A2	Sequence	# PSMs	# Proteins	# Protein Groups	Protein Group Accessions	Modifications	ΔCn	Area	IonScore	Exp Value	# Missed Cleavages
	High	VLDELTLTK	1	2	1	CON_00009865.2		0	1.21642e+07	61.51	2.26022e-06	0
	High	VTMQNLNDR	1	13	4	CON_00009865.2;CON_00217963.3;CON_00384444.5;CON_00721270.3		0	1.12656e+07	47.62	8.13014e-05	0
	High	TIDDLKNQILNLTTDNANILLQIDNAR	1	1	1	CON_00009865.2		0	7.1542e+06	44.4	7.62464e-05	1
	High	DAEAWFNEK	1	6	1	CON_00009865.2		0	8.52368e+06	30.46	0.00188894	0
	Medium	LAADDFR	1	36	4	CON_00009865.2;CON_00217963.3;CON_00384444.5;CON_00721270.3		0	1.14834e+07	29.16	0.00764435	0
	Medium	ADLEMQIESLTEELAYLKK	1	1	1	CON_00009865.2		0	8.41733e+06	25.87	0.0119058	1
	Medium	NQILNLTTDNANILLQIDNAR	1	1	1	CON_00009865.2		0	4.00416e+06	20.54	0.0322324	0
Cfra_7075T1	Cfra_7075T1	111.192	8.77	1	1	1	2	3.29352e+07	171	18.5713	3.99268
	A2	Sequence	# PSMs	# Proteins	# Protein Groups	Protein Group Accessions	Modifications	ΔCn	Area	IonScore	Exp Value	# Missed Cleavages
	High	GGGIAMLLASWYHQQGSFNTIK	1	1	1	Cfra_2200T1		0	3.45739e+07	53.15	2.20298e-05	0
	High	GLSTGWFSDYSDSEAK	2	1	1	Cfra_2200T1		0	7.28507e+06	50.79	9.73096e-06	0
	High	MISWGSPR	1	2	1	Cfra_2200T1		0	7.48946e+06	35.14	0.00084204	0
	High	DVLTFAGHSR	2	2	1	Cfra_2200T1		0	9.58352e+06	34.04	0.00118337	0
	High	HSLTSTEWSHLQR	1	1	1	Cfra_2200T1		0	3.06475e+07	31.21	0.00276244	0
	Medium	GGGIAmLLASWYHQQGSFNTIK	1	1	1	Cfra_2200T1	M6(Oxidation)	0	8.89112e+06	29.98	0.00401846	0
Cfra_4564T1	Cfra_4564T1	77.1303	2.07	1	1	2	2	3.22553e+07	920	101.493	4.84326
	A2	Sequence	# PSMs	# Proteins	# Protein Groups	Protein Group Accessions	Modifications	ΔCn	Area	IonScore	Exp Value	# Missed Cleavages
	High	TITTFNTGMFNTVSNYDER	1	1	1	Cfra_8556T1		0	4.73279e+06	69.93	2.33737e-07	0
	High	EVIDSDLFcQQEIWYK	2	1	1	Cfra_8556T1	C9(Carbamidomethyl)	0	9.99912e+06	64.76	1.05271e-06	0
	High	DDLFALLEcWEQEQPAEFASIHDDRK	1	1	1	Cfra_8556T1	C9(Carbamidomethyl)	0	5.02638e+06	44.09	8.77369e-05	1
	High	DDLFALLEcWEQEQPAEFASIHDDR	1	1	1	Cfra_8556T1	C9(Carbamidomethyl)	0	942003	39.38	0.000161483	0
	Medium	EMTWDVVPR	1	1	1	Cfra_8556T1		0	1.03323e+07	23.7	0.00959804	0
CON_00688100.4	ENSEMBL:ENSBTAP00000017505 REFSEQ:NP_001001135 (Bos taurus) Gene_Symbol=COL2A1 collagen, type II, alpha 1 isoform 1	29.7	0.74	1	1	1	1	2.73902e+07	1490	142.127	7.45947
	A2	Sequence	# PSMs	# Proteins	# Protein Groups	Protein Group Accessions	Modifications	ΔCn	Area	IonScore	Exp Value	# Missed Cleavages
	High	ADTLTDEINFLR	1	3	1	CON_00293665.7		0	5.49196e+06	48.21	4.60574e-05	0
	High	NLDLDSIIAEVK	1	10	1	CON_00293665.7		0	2.17907e+07	43.46	0.000191597	0
	High	NKYEDEINKR	1	13	2	CON_00220327.3;CON_00293665.7		0	3.7467e+07	41.18	0.000327694	2
	High	WTLLQEQGTK	1	5	1	CON_00293665.7		0	7.91345e+06	38.38	0.000849485	0
	High	FASFIDK	1	39	1	CON_00293665.7		0	7.43762e+06	31.95	0.00245731	0
Cfra_2101T1	Cfra_2101T1	51.4719	10.42	1	1	1	2	2.57303e+07	288	31.4667	4.52588
	A2	Sequence	# PSMs	# Proteins	# Protein Groups	Protein Group Accessions	Modifications	ΔCn	Area	IonScore	Exp Value	# Missed Cleavages
	High	LAANDIWNVVGDNSR	2	1	1	Cfra_7186T1		0	7.27321e+06	71.61	2.51938e-07	0
	Medium	GVFLGYR	1	2	1	Cfra_7186T1		0	8.14154e+06	24.2	0.00893445	0
	Medium	NELFFER	1	1	1	Cfra_7186T1		0	5.33848e+06	24.13	0.0108183	0
	Medium	ELNSANIYHGIISSVEEYGTAGVFIMPR	1	1	1	Cfra_7186T1		0	2.69797e+06	22.89	0.0246741	0
Cfra_0645T1	Cfra_0645T1	64.92	2.85	1	1	1	1	2.42495e+07	527	58.9412	4.91943
	A2	Sequence	# PSMs	# Proteins	# Protein Groups	Protein Group Accessions	Modifications	ΔCn	Area	IonScore	Exp Value	# Missed Cleavages
	High	IPTALLTLESAK	1	1	1	Cfra_6822T1		0	1.0924e+07	57.79	3.99219e-06	0
	High	GEVQVVTLMQFTPLK	1	1	1	Cfra_6822T1		0	2.98389e+06	46.11	6.24511e-05	0
	High	TWDVITVDK	1	1	1	Cfra_6822T1		0	2.7484e+06	40.92	0.000319593	0
	High	SQFEMVPLWVGSAR	1	1	1	Cfra_6822T1		0	2.74188e+06	40.52	0.000385913	0
Cfra_1297T1	Cfra_1297T1	29.58	0.51	1	1	1	1	2.31389e+07	1385	152.954	6.91748
	A2	Sequence	# PSMs	# Proteins	# Protein Groups	Protein Group Accessions	Modifications	ΔCn	Area	IonScore	Exp Value	# Missed Cleavages
	High	AVGLTEVMPFLLEDK	1	1	1	Cfra_7357T1		0	1.03335e+07	82.59	2.56126e-08	0
	High	NVLFVLTSNNK	1	1	1	Cfra_7357T1		0	7.04236e+06	71.38	2.25612e-07	0
	High	KFDSPLTLSEVSAADYDAVFYPGGHGPVWDLVTDK	1	1	1	Cfra_7357T1		0	8.82249e+06	37.92	0.000492379	1
	Medium	VDDWQTHVVVDANLITGQNPGSSER	1	1	1	Cfra_7357T1		0	7.74328e+06	21.75	0.029073	0
Cfra_7391T1	Cfra_7391T1	31.05	1.76	1	1	1	1	2.01483e+07	398	44.6844	4.52588
	A2	Sequence	# PSMs	# Proteins	# Protein Groups	Protein Group Accessions	Modifications	ΔCn	Area	IonScore	Exp Value	# Missed Cleavages
	High	GVLDFVEPGVLVGDDVTK	1	1	1	Cfra_5288T1		0	4.19522e+06	58.19	5.99235e-06	0
	High	ASEQGLIDR	1	1	1	Cfra_5288T1		0	1.73044e+07	38.38	0.000624408	0
	High	LLPWVEGcIAEGEK	1	1	1	Cfra_5288T1	C8(Carbamidomethyl)	0	2.87355e+07	36.54	0.00067655	0
Cfra_4801T1	Cfra_4801T1	27.19	11	1	1	1	1	1.85994e+07	100	10.6056	6.04932
	A2	Sequence	# PSMs	# Proteins	# Protein Groups	Protein Group Accessions	Modifications	ΔCn	Area	IonScore	Exp Value	# Missed Cleavages
	High	NTAFYPTTSLHSGGGAVYLDFIEGDVK	1	1	1	Cfra_3500T1		0	1.23823e+07	44.45	0.000138185	0
	High	IDIAGTFEK	1	1	1	Cfra_3500T1		0	7.87805e+06	39.14	0.000402267	0
	High	VDFTGEFIGNHAQGR	1	1	1	Cfra_3500T1		0	1.02334e+07	35.55	0.00101693	0
Cfra_3837T1	Cfra_3837T1	37.44	1.05	2	1	1	1	17663786	570	63.0169	6.23975
	A2	Sequence	# PSMs	# Proteins	# Protein Groups	Protein Group Accessions	Modifications	ΔCn	Area	IonScore	Exp Value	# Missed Cleavages
	High	IVScNDDAVQSFEWIGSNLR	3	1	1	Cfra_1387T1	C4(Carbamidomethyl)	0	2.84959e+07	67.28	6.64092e-07	0
	Medium	ATTcDTNFSDQQWK	1	1	1	Cfra_1387T1	C4(Carbamidomethyl)	0	2.11408e+07	19.25	0.0138725	0
	Medium	LGSAPVTTcSQ	1	1	1	Cfra_1387T1	C9(Carbamidomethyl)	0	4.11726e+07	18.63	0.0246759	0
Cfra_6517T1	Cfra_6517T1	58.06	4.76	1	1	1	1	1.4813e+07	357	39.4173	5.26221
	A2	Sequence	# PSMs	# Proteins	# Protein Groups	Protein Group Accessions	Modifications	ΔCn	Area	IonScore	Exp Value	# Missed Cleavages
	High	YIEWINSIIPESSYR	1	1	1	Cfra_5725T1		0	2.00384e+07	68.21	4.68125e-07	0
	High	TESDTLTDGVVVGIVSWGR	3	1	1	Cfra_5725T1		0	4.57015e+07	52.48	2.48572e-05	0
	High	HVVcHPDFSTR	1	1	1	Cfra_5725T1	C4(Carbamidomethyl)	0	9.84188e+07	31.8	0.00211422	0
Cfra_7151T1	Cfra_7151T1	23.98	10.41	1	1	1	1	1.36297e+07	317	35.7545	6.27783
	A2	Sequence	# PSMs	# Proteins	# Protein Groups	Protein Group Accessions	Modifications	ΔCn	Area	IonScore	Exp Value	# Missed Cleavages
	High	GILDLSIDSLTGSAK	1	1	1	Cfra_0155T1		0	4.33197e+06	73.81	1.58046e-07	0
	High	GEAcIPK	1	1	1	Cfra_0155T1	C4(Carbamidomethyl)	0	2.59956e+07	45.62	4.24944e-05	0
Cfra_6296T1	Cfra_6296T1	34.68	7.82	1	1	1	1	1.2965e+07	307	33.6523	5.52881
	A2	Sequence	# PSMs	# Proteins	# Protein Groups	Protein Group Accessions	Modifications	ΔCn	Area	IonScore	Exp Value	# Missed Cleavages
	High	DAWPIMK	1	1	1	Cfra_6434T1		0	5562730	29.23	0.00376106	0
	Medium	KLSNLGPASGLAEASVLDALLTR	1	1	1	Cfra_6434T1		0	4.28549e+06	18.01	0.0221375	1
Cfra_3449T1	Cfra_3449T1	21.03	0.46	1	1	1	1	1.18423e+07	1313	144.319	7.94287
	A2	Sequence	# PSMs	# Proteins	# Protein Groups	Protein Group Accessions	Modifications	ΔCn	Area	IonScore	Exp Value	# Missed Cleavages
	High	IGEFDFEDEIR	1	1	1	Cfra_4548T1		0	2.43337e+06	61.35	1.50229e-06	0
	High	GDIFFVPIK	1	2	1	Cfra_4548T1		0	6.96655e+06	52.75	1.51302e-05	0
Cfra_6911T1	Cfra_6911T1	76.2019	12.5	1	1	1	2	11653737	160	17.4246	5.19873
	A2	Sequence	# PSMs	# Proteins	# Protein Groups	Protein Group Accessions	Modifications	ΔCn	Area	IonScore	Exp Value	# Missed Cleavages
	High	TITLDVESSDTIDNVK	1	4	1	Cfra_2780T1		0	1.37046e+08	85.12	1.67647e-08	0
	High	ESTLHLVLR	2	5	2	CON_00726431.1;Cfra_2780T1		0	1.10277e+08	48.83	2.68382e-05	0
	High	TLADYNIQK	1	4	1	Cfra_2780T1		0	1.46839e+08	40.2	0.000334247	0
CON_00731432.2	SWISS-PROT:P04258 (Bos taurus) Similar to Collagen alpha 1(III) chain	39.93	0.75	1	1	1	1	11460679	1466	138.354	6.43018
	A2	Sequence	# PSMs	# Proteins	# Protein Groups	Protein Group Accessions	Modifications	ΔCn	Area	IonScore	Exp Value	# Missed Cleavages
	High	SLPLSLEFIR	1	1	1	Cfra_5812T1		0	2.99753e+06	28.2	0.00325416	0
	Medium	LAQDIVEDISGPLVVIcVLK	1	1	1	Cfra_5812T1	C17(Carbamidomethyl)	0	2.93607e+06	14.75	0.058619	0
Cfra_7272T1	Cfra_7272T1	23.56	0.41	1	1	1	1	1.13347e+07	1451	161.196	8.86572
	A2	Sequence	# PSMs	# Proteins	# Protein Groups	Protein Group Accessions	Modifications	ΔCn	Area	IonScore	Exp Value	# Missed Cleavages
	High	GIVGVVLFNHAK	1	1	1	Cfra_6096T1		0	2.77685e+06	47.32	2.16349e-05	0
	High	GSAMAAGFDLFSAHDGVIPAEGK	1	1	1	Cfra_6096T1		0	4.82271e+06	39.69	0.000316827	0
Cfra_1587T1	Cfra_1587T1	40.14	5.12	1	1	1	1	1.08565e+07	332	35.265	5.74463
	A2	Sequence	# PSMs	# Proteins	# Protein Groups	Protein Group Accessions	Modifications	ΔCn	Area	IonScore	Exp Value	# Missed Cleavages
	High	SNVDINVAHQGK	1	1	1	Cfra_3042T1		0	20819556	52.35	2.21199e-05	0
	Medium	ILAPVcTTTGVTFPNK	1	1	1	Cfra_3042T1	C6(Carbamidomethyl)	0	1.06429e+07	27.91	0.00671503	0
Cfra_6866T1	Cfra_6866T1	24.65	6.16	1	1	1	1	1.07966e+07	276	30.3986	5.43994
	A2	Sequence	# PSMs	# Proteins	# Protein Groups	Protein Group Accessions	Modifications	ΔCn	Area	IonScore	Exp Value	# Missed Cleavages
	High	LLESVNIVVPMHFGTFPK	1	1	1	Cfra_6386T1		0	1.05309e+07	54.31	1.20471e-05	0
	Medium	VYcIHEIGFFLK	1	1	1	Cfra_6386T1	C3(Carbamidomethyl)	0	5.84197e+06	23.08	0.0211577	0
Cfra_5297T1	Cfra_5297T1	23.88	0.39	1	1	1	1	1.02111e+07	1781	197.712	6.0874
	A2	Sequence	# PSMs	# Proteins	# Protein Groups	Protein Group Accessions	Modifications	ΔCn	Area	IonScore	Exp Value	# Missed Cleavages
	High	YGINSDGFFDLEDLPK	1	1	1	Cfra_0852T1		0	3.42803e+06	51.87	1.88538e-05	0
	High	TPLTDISLGVAGVETDKK	1	1	1	Cfra_0852T1		0	5.0647e+06	31.16	0.00222023	1
Cfra_7615T1	Cfra_7615T1	26.23	4.83	1	1	1	1	9.96166e+06	476	53.1018	5.16064
	A2	Sequence	# PSMs	# Proteins	# Protein Groups	Protein Group Accessions	Modifications	ΔCn	Area	IonScore	Exp Value	# Missed Cleavages
	High	GTESIYMVEGELTVGFVTEGGR	1	1	1	Cfra_1862T1		0	366516	47.33	6.10259e-05	0
	High	FHIGPcGINLPHVHPR	2	1	1	Cfra_1862T1	C6(Carbamidomethyl)	0	2.78723e+07	32.71	0.00222356	0
CON_00384444.5	SWISS-PROT:P02533 Tax_Id=9606 Gene_Symbol=KRT14 Keratin, type I cytoskeletal 14	102.655	5.3	28	1	3	3	8.80304e+06	472	51.5894	5.16064
	A2	Sequence	# PSMs	# Proteins	# Protein Groups	Protein Group Accessions	Modifications	ΔCn	Area	IonScore	Exp Value	# Missed Cleavages
	Medium	HILNIK	1	1	1	CON_00710056.3		0	38224746	19.83	0.0121382	0
Cfra_7641T1	Cfra_7641T1	22.95	0.67	1	1	1	1	8.39914e+06	900	101.308	6.60986
	A2	Sequence	# PSMs	# Proteins	# Protein Groups	Protein Group Accessions	Modifications	ΔCn	Area	IonScore	Exp Value	# Missed Cleavages
	Medium	NLLSVAYK	1	6	1	CON_00703110.1		0	4.25298e+06	26.33	0.00570382	0
Cfra_2768T1	Cfra_2768T1	25.89	1.17	1	1	1	1	8.25743e+06	515	58.3596	7.26904
	A2	Sequence	# PSMs	# Proteins	# Protein Groups	Protein Group Accessions	Modifications	ΔCn	Area	IonScore	Exp Value	# Missed Cleavages
	Medium	GPPGPVGPSGK	1	1	1	CON_00688100.4		0	2.73902e+07	29.7	0.00487541	0
CON_00721270.3	SWISS-PROT:P05785 ENSEMBL:ENSBTAP00000036252 REFSEQ:XP_881090 (Bos taurus) Gene_Symbol=KRT14 keratin 19 isoform 8	89.925	5.24	30	1	3	3	8.19018e+06	477	51.8487	5.16064
	A2	Sequence	# PSMs	# Proteins	# Protein Groups	Protein Group Accessions	Modifications	ΔCn	Area	IonScore	Exp Value	# Missed Cleavages
	Medium	KALLQK	1	1	1	Cfra_3449T1		0	1.18423e+07	21.03	0.0149883	1
Cfra_2539T1	Cfra_2539T1	22.93	4.76	2	1	1	1	7.98187e+06	147	16.7911	7.85498
	A2	Sequence	# PSMs	# Proteins	# Protein Groups	Protein Group Accessions	Modifications	ΔCn	Area	IonScore	Exp Value	# Missed Cleavages
	Medium	LDESLK	1	1	1	Cfra_7272T1		0	1.13347e+07	23.56	0.0233494	0
Cfra_6174T1	Cfra_6174T1	92.29	6.9	1	1	1	1	7.70998e+06	232	25.5749	7.26904
	A2	Sequence	# PSMs	# Proteins	# Protein Groups	Protein Group Accessions	Modifications	ΔCn	Area	IonScore	Exp Value	# Missed Cleavages
	High	LITELK	1	2	1	Cfra_3837T1		0	17663786	37.44	0.000838403	0
Cfra_3693T1	Cfra_3693T1	30.75	1.09	1	1	1	1	7.15035e+06	645	74.637	6.49365
	A2	Sequence	# PSMs	# Proteins	# Protein Groups	Protein Group Accessions	Modifications	ΔCn	Area	IonScore	Exp Value	# Missed Cleavages
	High	AIGFEVR	1	1	1	Cfra_3693T1		0	7.15035e+06	30.75	0.00366007	0
Cfra_5973T1	Cfra_5973T1	24.557	1.66	1	1	1	2	6.79047e+06	723	79.5857	5.17334
	A2	Sequence	# PSMs	# Proteins	# Protein Groups	Protein Group Accessions	Modifications	ΔCn	Area	IonScore	Exp Value	# Missed Cleavages
	High	IPDPEDK	1	1	1	Cfra_7391T1		0	2.01483e+07	31.05	0.00113859	0
Cfra_1231T1	Cfra_1231T1	51.8419	9.41	1	1	1	2	6.63698e+06	202	21.7873	8.80713
	A2	Sequence	# PSMs	# Proteins	# Protein Groups	Protein Group Accessions	Modifications	ΔCn	Area	IonScore	Exp Value	# Missed Cleavages
	High	QMITSKK	1	1	1	Cfra_1297T1		0	2.31389e+07	29.58	0.00385539	1
Cfra_0574T1	Cfra_0574T1	23.52	4.74	1	1	1	1	6.57977e+06	274	29.1658	7.98682
	A2	Sequence	# PSMs	# Proteins	# Protein Groups	Protein Group Accessions	Modifications	ΔCn	Area	IonScore	Exp Value	# Missed Cleavages
	High	IVLHSGYNSNSLANDIAMIR	6	2	2	Cfra_6234T1;Cfra_7376T1		0	3.21546e+09	86.13	1.59677e-08	0
	High	IVLHSGYNSNSLANDIAmIR	5	2	2	Cfra_6234T1;Cfra_7376T1	M18(Oxidation)	0	3.82297e+08	79.43	5.4732e-08	0
	High	GKDScQGDSGGPVVAPGSDGR	2	3	3	Cfra_6234T1;Cfra_6243T1;Cfra_7376T1	C5(Carbamidomethyl)	0	7.81891e+08	67.89	2.03194e-07	1
	High	TSTcQYVYGNTmVTSK	1	2	2	Cfra_6234T1;Cfra_7376T1	C4(Carbamidomethyl); M12(Oxidation)	0	37861563	67.73	1.96859e-07	0
	High	TSTcQYVYGNTMVTSK	1	2	2	Cfra_6234T1;Cfra_7376T1	C4(Carbamidomethyl)	0	2.5258e+08	64.31	7.04293e-07	0
	High	DWVVTAAHcLYGR	2	6	4	Cfra_6234T1;Cfra_6243T1;Cfra_7376T1;Cfra_6582T1	C9(Carbamidomethyl)	0	9.24528e+08	61.78	2.09079e-06	0
	High	LVGIVSWGQGcAR	1	3	3	Cfra_6234T1;Cfra_6243T1;Cfra_7376T1	C11(Carbamidomethyl)	0	1.26854e+09	61.02	3.75572e-06	0
	High	IGMTTQSGNDYmHK	4	3	3	Cfra_6234T1;Cfra_6243T1;Cfra_7376T1	M12(Oxidation)	0	5.86794e+08	57.72	1.97313e-06	0
	High	IGMTTQSGNDYMHK	2	3	3	Cfra_6234T1;Cfra_6243T1;Cfra_7376T1		0	2.70543e+09	54.63	5.16525e-06	0
	High	IVGGVPVTER	1	3	3	Cfra_6234T1;Cfra_6243T1;Cfra_7376T1		0	4.93134e+09	50.83	1.19776e-05	0
	High	VSSSYSHQLK	1	5	4	Cfra_6234T1;Cfra_6243T1;Cfra_7376T1;Cfra_6582T1		0	4.69177e+09	49.66	3.73095e-05	0
	High	VSSFIGWMDDTmANN	1	1	1	Cfra_6234T1	M12(Oxidation)	0	7.17017e+07	42.69	6.28284e-05	0
	High	RGYPGVNTR	2	4	4	Cfra_6234T1;Cfra_6243T1;Cfra_7376T1;Cfra_6582T1		0	2.65222e+09	38.4	0.000390269	1
	High	IPFMVSLNDPTWGSNGFHYcGGSLINK	1	3	3	Cfra_6234T1;Cfra_6243T1;Cfra_7376T1	C20(Carbamidomethyl)	0	1.29451e+08	35.82	0.000785455	0
	High	IPFmVSLNDPTWGSNGFHYcGGSLINK	1	3	3	Cfra_6234T1;Cfra_6243T1;Cfra_7376T1	M4(Oxidation); C20(Carbamidomethyl)	0	1.87141e+07	34.09	0.00120882	0
	High	NVcTYTR	1	3	3	Cfra_6234T1;Cfra_6243T1;Cfra_7376T1	C3(Carbamidomethyl)	0	3.41515e+08	27.72	0.00197313	0
	High	IGmTTQSGNDYmHK	2	3	3	Cfra_6234T1;Cfra_6243T1;Cfra_7376T1	M3(Oxidation); M12(Oxidation)	0	1.06334e+08	25.61	0.00320742	0
	Medium	VSSFIGWMDDTMANN	1	1	1	Cfra_6234T1		0	4.32726e+08	18.98	0.0147624	0
	High	VSSFIGWmDDTmANN	1	1	1	Cfra_6234T1	M8(Oxidation); M12(Oxidation)	0	1.09978e+07	17.17	0.0223952	0
Cfra_2284T1	Cfra_2284T1	92.35	7.54	1	1	1	2	6.55494e+06	252	28.455	4.53857
	A2	Sequence	# PSMs	# Proteins	# Protein Groups	Protein Group Accessions	Modifications	ΔCn	Area	IonScore	Exp Value	# Missed Cleavages
	High	VSSFIDWMDDTMANN	2	1	1	Cfra_7376T1		0	9.11367e+08	101.19	8.87474e-11	0
	High	IVLHSGYNSNSLANDIAMIR	6	2	2	Cfra_6234T1;Cfra_7376T1		0	3.21546e+09	86.13	1.59677e-08	0
	High	IVLHSGYNSNSLANDIAmIR	5	2	2	Cfra_6234T1;Cfra_7376T1	M18(Oxidation)	0	3.82297e+08	79.43	5.4732e-08	0
	High	GKDScQGDSGGPVVAPGSDGR	2	3	3	Cfra_6234T1;Cfra_6243T1;Cfra_7376T1	C5(Carbamidomethyl)	0	7.81891e+08	67.89	2.03194e-07	1
	High	TSTcQYVYGNTmVTSK	1	2	2	Cfra_6234T1;Cfra_7376T1	C4(Carbamidomethyl); M12(Oxidation)	0	37861563	67.73	1.96859e-07	0
	High	TSTcQYVYGNTMVTSK	1	2	2	Cfra_6234T1;Cfra_7376T1	C4(Carbamidomethyl)	0	2.5258e+08	64.31	7.04293e-07	0
	High	DWVVTAAHcLYGR	2	6	4	Cfra_6234T1;Cfra_6243T1;Cfra_7376T1;Cfra_6582T1	C9(Carbamidomethyl)	0	9.24528e+08	61.78	2.09079e-06	0
	High	LVGIVSWGQGcAR	1	3	3	Cfra_6234T1;Cfra_6243T1;Cfra_7376T1	C11(Carbamidomethyl)	0	1.26854e+09	61.02	3.75572e-06	0
	High	IGMTTQSGNDYmHK	4	3	3	Cfra_6234T1;Cfra_6243T1;Cfra_7376T1	M12(Oxidation)	0	5.86794e+08	57.72	1.97313e-06	0
	High	IGMTTQSGNDYMHK	2	3	3	Cfra_6234T1;Cfra_6243T1;Cfra_7376T1		0	2.70543e+09	54.63	5.16525e-06	0
	High	IVGGVPVTER	1	3	3	Cfra_6234T1;Cfra_6243T1;Cfra_7376T1		0	4.93134e+09	50.83	1.19776e-05	0
	High	VSSSYSHQLK	1	5	4	Cfra_6234T1;Cfra_6243T1;Cfra_7376T1;Cfra_6582T1		0	4.69177e+09	49.66	3.73095e-05	0
	High	RGYPGVNTR	2	4	4	Cfra_6234T1;Cfra_6243T1;Cfra_7376T1;Cfra_6582T1		0	2.65222e+09	38.4	0.000390269	1
	High	VSSFIDWmDDTMANN	8	1	1	Cfra_7376T1	M8(Oxidation)	0	1.88468e+08	38.14	0.000179125	0
	High	VSSFIDWmDDTmANN	1	1	1	Cfra_7376T1	M8(Oxidation); M12(Oxidation)	0	3.02821e+07	36.8	0.000243869	0
	High	IPFMVSLNDPTWGSNGFHYcGGSLINK	1	3	3	Cfra_6234T1;Cfra_6243T1;Cfra_7376T1	C20(Carbamidomethyl)	0	1.29451e+08	35.82	0.000785455	0
	High	IPFmVSLNDPTWGSNGFHYcGGSLINK	1	3	3	Cfra_6234T1;Cfra_6243T1;Cfra_7376T1	M4(Oxidation); C20(Carbamidomethyl)	0	1.87141e+07	34.09	0.00120882	0
	High	NVcTYTR	1	3	3	Cfra_6234T1;Cfra_6243T1;Cfra_7376T1	C3(Carbamidomethyl)	0	3.41515e+08	27.72	0.00197313	0
	High	IGmTTQSGNDYmHK	2	3	3	Cfra_6234T1;Cfra_6243T1;Cfra_7376T1	M3(Oxidation); M12(Oxidation)	0	1.06334e+08	25.61	0.00320742	0
Cfra_8452T1	Cfra_8452T1	34.99	5.47	3	1	1	1	6.3837e+06	201	22.2822	5.43994
	A2	Sequence	# PSMs	# Proteins	# Protein Groups	Protein Group Accessions	Modifications	ΔCn	Area	IonScore	Exp Value	# Missed Cleavages
	Medium	IEILSTFK	1	1	1	Cfra_7429T1		0	1.79611e+06	20.99	0.0159232	0
Cfra_5166T1	Cfra_5166T1	20.9	1.24	1	1	1	1	5.81448e+06	725	80.9413	9.20264
	A2	Sequence	# PSMs	# Proteins	# Protein Groups	Protein Group Accessions	Modifications	ΔCn	Area	IonScore	Exp Value	# Missed Cleavages
	High	ATLNPGSLAGVNIDAAK	2	1	1	Cfra_3499T1		0	9.131e+08	90.15	3.28457e-09	0
	High	VccQWSGK	1	2	2	Cfra_3499T1;Cfra_7846T1	C2(Carbamidomethyl); C3(Carbamidomethyl)	0	3.00564e+07	44.15	4.48906e-05	0
Cfra_0694T1	Cfra_0694T1	31.0919	8.97	4	1	1	2	5.6678e+06	234	26.1479	5.99854
	A2	Sequence	# PSMs	# Proteins	# Protein Groups	Protein Group Accessions	Modifications	ΔCn	Area	IonScore	Exp Value	# Missed Cleavages
	High	MDDLAEVYR	1	2	2	Cfra_4568T1;Cfra_4564T1		0	3.62252e+07	56.91	3.66668e-06	0
	High	DGVLLTDETK	1	1	1	Cfra_4564T1		0	28285328	34.82	0.00140084	0
Cfra_2213T1	Cfra_2213T1	42.07	7.26	1	1	1	1	5.36395e+06	303	32.54	4.86865
	A2	Sequence	# PSMs	# Proteins	# Protein Groups	Protein Group Accessions	Modifications	ΔCn	Area	IonScore	Exp Value	# Missed Cleavages
	High	MDLIDLDDDK	1	1	1	Cfra_8438T1		0	3.35995e+06	43.66	5.02523e-05	0
Cfra_3377T1	Cfra_3377T1	38.79	7.14	1	1	1	1	4.95732e+06	252	27.4146	4.18311
	A2	Sequence	# PSMs	# Proteins	# Protein Groups	Protein Group Accessions	Modifications	ΔCn	Area	IonScore	Exp Value	# Missed Cleavages
	Medium	MSLVTSFFFK	1	1	1	Cfra_3745T1		0	864604	28.96	0.00514583	0
Cfra_4128T1	Cfra_4128T1	22.03	7.72	1	1	1	1	4.44251e+06	272	31.2217	4.44971
	A2	Sequence	# PSMs	# Proteins	# Protein Groups	Protein Group Accessions	Modifications	ΔCn	Area	IonScore	Exp Value	# Missed Cleavages
	High	GSLEEELQEVLK	1	1	1	Cfra_3702T1		0	1.80946e+06	41.17	0.000332269	0
Cfra_7648T1	Cfra_7648T1	44.75	2.11	1	1	1	1	4.43896e+06	473	51.7767	4.97021
	A2	Sequence	# PSMs	# Proteins	# Protein Groups	Protein Group Accessions	Modifications	ΔCn	Area	IonScore	Exp Value	# Missed Cleavages
	Medium	SFFTEEGQELAK	2	1	1	Cfra_5973T1		0	6.79047e+06	22.9	0.0105137	0
CON_00703110.1	SWISS-PROT:P63103 ENSEMBL:ENSBTAP00000000289 REFSEQ:NP_777239 (Bos taurus) Gene_Symbol=YWHAZ 14-3-3 protein zeta/delta	26.33	3.27	6	1	1	1	4.25298e+06	245	27.7277	4.79248
	A2	Sequence	# PSMs	# Proteins	# Protein Groups	Protein Group Accessions	Modifications	ΔCn	Area	IonScore	Exp Value	# Missed Cleavages
	Medium	IVIHPSFNAAYLK	1	1	1	Cfra_0574T1		0	6.57977e+06	23.52	0.0144505	0
Cfra_6627T1	Cfra_6627T1	34.44	12.73	1	1	1	1	4.18274e+06	110	11.5124	7.91357
	A2	Sequence	# PSMs	# Proteins	# Protein Groups	Protein Group Accessions	Modifications	ΔCn	Area	IonScore	Exp Value	# Missed Cleavages
	High	NILTQIDLVSLFR	1	1	1	Cfra_0792T1		0	947604	46.31	3.04049e-05	0
Cfra_0684T1	Cfra_0684T1	50.84	2.94	1	1	1	1	4031244	340	38.3573	6.46826
	A2	Sequence	# PSMs	# Proteins	# Protein Groups	Protein Group Accessions	Modifications	ΔCn	Area	IonScore	Exp Value	# Missed Cleavages
	High	VNMKEDEAVGSAYK	1	1	1	Cfra_6627T1		0	4.18274e+06	34.44	0.00102529	1
Cfra_4890T1	Cfra_4890T1	26.21	15.1	1	1	1	1	3.88363e+06	192	21.9531	6.78564
	A2	Sequence	# PSMs	# Proteins	# Protein Groups	Protein Group Accessions	Modifications	ΔCn	Area	IonScore	Exp Value	# Missed Cleavages
	High	DEYNWLLDEILK	1	1	1	Cfra_2782T1		0	2.63232e+06	68.61	5.30226e-07	0
Cfra_8438T1	Cfra_8438T1	43.66	1.25	1	1	1	1	3.35995e+06	802	89.0576	5.13525
	A2	Sequence	# PSMs	# Proteins	# Protein Groups	Protein Group Accessions	Modifications	ΔCn	Area	IonScore	Exp Value	# Missed Cleavages
	High	TAAVQGSGWGWLGYDK	1	1	1	Cfra_6174T1		0	7.70998e+06	92.29	1.7706e-09	0
Cfra_6331T1	Cfra_6331T1	84.25	0.72	1	1	1	1	3.07193e+06	1932	219.491	5.30029
	A2	Sequence	# PSMs	# Proteins	# Protein Groups	Protein Group Accessions	Modifications	ΔCn	Area	IonScore	Exp Value	# Missed Cleavages
	Medium	SLTVNVPAGATANIIQR	1	1	1	Cfra_6866T1		0	1.07966e+07	24.65	0.00736951	0
Cfra_7251T1	Cfra_7251T1	70.2	1.56	1	1	1	1	2.98626e+06	706	76.0097	5.21143
	A2	Sequence	# PSMs	# Proteins	# Protein Groups	Protein Group Accessions	Modifications	ΔCn	Area	IonScore	Exp Value	# Missed Cleavages
	High	VIDVDVKPVGPGQVVVK	1	1	1	Cfra_1587T1		0	1.08565e+07	40.14	0.00011302	0
Cfra_1194T1	Cfra_1194T1	32.27	8.15	2	1	1	1	2.82756e+06	184	20.7275	6.06201
	A2	Sequence	# PSMs	# Proteins	# Protein Groups	Protein Group Accessions	Modifications	ΔCn	Area	IonScore	Exp Value	# Missed Cleavages
	High	LANALGFLSTAVHIIDEK	1	1	1	Cfra_6360T1		0	2.37247e+06	35.13	0.00072122	0
Cfra_2549T1	Cfra_2549T1	43.16	5.15	1	1	1	1	2.64565e+06	272	29.6374	7.7085
	A2	Sequence	# PSMs	# Proteins	# Protein Groups	Protein Group Accessions	Modifications	ΔCn	Area	IonScore	Exp Value	# Missed Cleavages
	High	IIGGFDVDTAPTWTVSLR	1	1	1	Cfra_6946T1		0	2.28044e+06	39.6	0.000449556	0
Cfra_2782T1	Cfra_2782T1	68.61	2.75	1	1	1	1	2.63232e+06	436	50.9216	5.24951
	A2	Sequence	# PSMs	# Proteins	# Protein Groups	Protein Group Accessions	Modifications	ΔCn	Area	IonScore	Exp Value	# Missed Cleavages
	High	SQEDQDKEDEESIEAPK	1	1	1	Cfra_6517T1		0	1.4813e+07	58.06	1.82455e-06	1
Cfra_2040T1	Cfra_2040T1	30.77	3.61	1	1	1	1	2.59214e+06	305	34.923	5.50342
	A2	Sequence	# PSMs	# Proteins	# Protein Groups	Protein Group Accessions	Modifications	ΔCn	Area	IonScore	Exp Value	# Missed Cleavages
	High	NDEYWIAPTAQVIGNVTLK	2	1	1	Cfra_1231T1		0	6.63698e+06	44.26	0.000166863	0
Cfra_6360T1	Cfra_6360T1	35.13	1.01	1	1	1	1	2.37247e+06	1782	195.066	5.26221
	A2	Sequence	# PSMs	# Proteins	# Protein Groups	Protein Group Accessions	Modifications	ΔCn	Area	IonScore	Exp Value	# Missed Cleavages
	Medium	AGIESDDVISIAYLSVGTVHK	1	1	1	Cfra_4128T1		0	4.44251e+06	22.03	0.0338371	0
Cfra_2843T1	Cfra_2843T1	27.93	0.98	2	1	1	1	2.33964e+06	613	67.4151	9.5835
	A2	Sequence	# PSMs	# Proteins	# Protein Groups	Protein Group Accessions	Modifications	ΔCn	Area	IonScore	Exp Value	# Missed Cleavages
	High	FFTTLGALATAPGNTGIWIQQK	1	1	1	Cfra_2213T1		0	5.36395e+06	42.07	0.0002142	0
Cfra_6946T1	Cfra_6946T1	39.6	4.89	1	1	1	1	2.28044e+06	368	38.4308	4.53857
	A2	Sequence	# PSMs	# Proteins	# Protein Groups	Protein Group Accessions	Modifications	ΔCn	Area	IonScore	Exp Value	# Missed Cleavages
	High	EIDYENNNNEDEDLTDEIR	2	1	1	Cfra_2284T1		0	6.55494e+06	72.94	5.93138e-08	0
Cfra_6534T1	Cfra_6534T1	24.84	1.09	1	1	1	1	2.17855e+06	644	73.4008	7.21045
	A2	Sequence	# PSMs	# Proteins	# Protein Groups	Protein Group Accessions	Modifications	ΔCn	Area	IonScore	Exp Value	# Missed Cleavages
	Medium	VNIHATDGGFEWVSNIDTVYK	2	4	1	Cfra_0694T1		0	5.6678e+06	25.73	0.0100238	0
Cfra_0952T1	Cfra_0952T1	45.2	2.16	1	1	1	1	2.00383e+06	647	72.4414	5.60498
	A2	Sequence	# PSMs	# Proteins	# Protein Groups	Protein Group Accessions	Modifications	ΔCn	Area	IonScore	Exp Value	# Missed Cleavages
	High	VIGFHFIGPNAGEITQGYALAIK	1	1	1	Cfra_3810T1		0	1.9564e+06	33.56	0.00140978	0
Cfra_3810T1	Cfra_3810T1	33.56	4.51	1	1	1	1	1.9564e+06	510	54.7862	5.80811
	A2	Sequence	# PSMs	# Proteins	# Protein Groups	Protein Group Accessions	Modifications	ΔCn	Area	IonScore	Exp Value	# Missed Cleavages
	High	INMPMITVSEWANTQYQYIK	2	1	1	Cfra_6911T1		0	11653737	54.53	1.26854e-05	0
Cfra_3702T1	Cfra_3702T1	41.17	2.82	1	1	1	1	1.80946e+06	425	47.9962	8.68994
	A2	Sequence	# PSMs	# Proteins	# Protein Groups	Protein Group Accessions	Modifications	ΔCn	Area	IonScore	Exp Value	# Missed Cleavages
	High	ILTTPLVLHTVFLTGANIPTQIR	1	1	1	Cfra_7615T1		0	9.96166e+06	26.23	0.00278071	0
Cfra_7429T1	Cfra_7429T1	20.99	1.69	1	1	1	1	1.79611e+06	472	50.484	4.58936
	A2	Sequence	# PSMs	# Proteins	# Protein Groups	Protein Group Accessions	Modifications	ΔCn	Area	IonScore	Exp Value	# Missed Cleavages
	High	MNALLSEITNVEQTSEGQLVLHNK	1	1	1	Cfra_6296T1		0	1.2965e+07	34.68	0.00151482	0
Cfra_5567T1	Cfra_5567T1	23.44	4.12	1	1	1	1	1.70406e+06	170	19.1144	8.17725
	A2	Sequence	# PSMs	# Proteins	# Protein Groups	Protein Group Accessions	Modifications	ΔCn	Area	IonScore	Exp Value	# Missed Cleavages
	Medium	FAFTTVVPGEHFVcLTTDAGWVGTGAAIK	1	1	1	Cfra_4890T1	C14(Carbamidomethyl)	0	3.88363e+06	26.21	0.0112486	0
Cfra_0261T1	Cfra_0261T1	28.76	4.19	1	1	1	1	1.26332e+06	334	36.8561	4.89404
	A2	Sequence	# PSMs	# Proteins	# Protein Groups	Protein Group Accessions	Modifications	ΔCn	Area	IonScore	Exp Value	# Missed Cleavages
	High	AWLDEHITTGSAKPDAEVEPEEAEGSHEEL	1	1	1	Cfra_1840T1		0	4.02667e+07	50.81	1.6597e-05	0
Cfra_0792T1	Cfra_0792T1	46.31	10.92	1	1	1	1	947604	119	13.292	8.47021
	A2	Sequence	# PSMs	# Proteins	# Protein Groups	Protein Group Accessions	Modifications	ΔCn	Area	IonScore	Exp Value	# Missed Cleavages
	High	KDVVEPEVEPVIEPEEAVVEPEVETVVEPK	2	1	1	Cfra_2101T1		0	2.57303e+07	45.42	0.000113396	1
Cfra_3745T1	Cfra_3745T1	28.96	0.72	1	1	1	1	864604	1385	151.83	6.49365
	A2	Sequence	# PSMs	# Proteins	# Protein Groups	Protein Group Accessions	Modifications	ΔCn	Area	IonScore	Exp Value	# Missed Cleavages
	Medium	MAPSRSIGAmSmEKFASTISmSmHELGSMLFLR	1	1	1	Cfra_7151T1	M10(Oxidation); M12(Oxidation); M21(Oxidation); M23(Oxidation)	0	1.36297e+07	23.98	0.00639912	2

## Sheet: Proteins
Accession	Description	Score	Coverage	# Proteins	# Unique Peptides	# Peptides	# PSMs	Area	# AAs	MW [kDa]	calc. pI
Cfra_4119T1	Cfra_4119T1	1464.22	47.83	3	28	28	60	4.49276e+08	715	80.0794	4.86865
Cfra_4775T1	Cfra_4775T1	474.534	17.17	1	19	19	25	3.99243e+07	1316	144.202	4.61475
Cfra_8133T1	Cfra_8133T1	568.941	44.36	1	16	16	25	4.88483e+07	417	45.5161	9.08545
Cfra_4765T1	Cfra_4765T1	551.832	44.81	2	14	14	19	8.56793e+07	308	33.4248	7.45947
Cfra_7049T1	Cfra_7049T1	486.202	45.69	1	14	14	19	1.59256e+08	418	46.7125	5.37646
Cfra_4547T1	Cfra_4547T1	357.278	25	1	13	13	17	1.58969e+08	516	56.7345	5.75732
Cfra_4568T1	Cfra_4568T1	465.701	21.61	1	13	14	21	2.78094e+08	884	98.6379	4.62744
Cfra_7050T1	Cfra_7050T1	696.054	41.49	1	13	13	28	2.0136e+08	429	48.3403	5.21143
Cfra_3417T1	Cfra_3417T1	497.773	62.62	2	13	13	20	1.29412e+08	305	32.7993	5.04639
CON_00220327.3	SWISS-PROT:P04264 Tax_Id=9606 Gene_Symbol=KRT1 Keratin, type II cytoskeletal 1	440.342	22.2	4	12	13	18	3.6996e+07	644	65.978	8.11865
Cfra_6846T1	Cfra_6846T1	498.315	38.77	1	12	12	17	9.61328e+07	454	51.4529	4.4624
Cfra_6437T1	Cfra_6437T1	348.916	34.91	1	12	12	14	1.04489e+08	487	53.0259	4.83057
Cfra_3564T1	Cfra_3564T1	319.038	8.48	1	12	12	15	5.57881e+07	1722	185.553	4.70361
Cfra_1091T1	Cfra_1091T1	304.258	20.99	1	11	11	16	1.23593e+08	729	81.8198	4.71631
Cfra_7087T1	Cfra_7087T1	516.893	22.04	1	11	11	17	1.27829e+08	871	93.4887	4.31006
Cfra_6671T1	Cfra_6671T1	251.308	5.95	1	10	10	10	2.1218e+07	1982	216.059	5.09717
Cfra_1701T1	Cfra_1701T1	566.899	48.63	1	10	10	21	6.56981e+08	292	31.3362	5.10986
Cfra_3807T1	Cfra_3807T1	625.482	42.38	1	9	14	22	8.64532e+07	512	56.1544	5.13525
Cfra_1735T1	Cfra_1735T1	216.208	26.13	2	9	9	9	2.13741e+07	421	46.9813	5.35107
Cfra_6582T1	Cfra_6582T1	1345.74	50	3	9	12	60	3.75267e+09	280	29.5144	5.80811
Cfra_7076T1	Cfra_7076T1	166.837	13.64	3	8	8	10	1.29382e+07	792	88.9106	5.13525
Cfra_2646T1	Cfra_2646T1	181.685	15.84	1	8	8	9	1.60075e+07	808	91.3616	4.729
Cfra_6432T1	Cfra_6432T1	455.002	46.52	1	8	8	17	1.00918e+08	273	29.8912	5.13525
CON_00019359.3	SWISS-PROT:P35527 Tax_Id=9606 Gene_Symbol=KRT9 Keratin, type I cytoskeletal 9	194.308	20.39	1	7	7	8	2.23732e+07	623	62.0919	5.30029
Cfra_3159T1	Cfra_3159T1	339.398	30.77	1	7	8	12	1.23729e+08	286	30.8652	5.47803
Cfra_2752T1	Cfra_2752T1	216.422	15.9	1	7	7	8	2.49777e+07	629	68.5798	4.57666
Cfra_3806T1	Cfra_3806T1	380.052	25.64	1	6	11	16	6.96482e+07	511	55.6482	5.19873
Cfra_3337T1	Cfra_3337T1	130.738	58.27	1	6	6	6	2.92104e+07	139	15.7039	5.23682
Cfra_3061T1	Cfra_3061T1	163.724	21.3	1	6	6	8	7.63295e+06	338	36.8545	5.74463
Cfra_5595T1	Cfra_5595T1	147.688	5.76	1	6	6	6	1.18679e+07	1198	131.159	5.5415
Cfra_1153T1	Cfra_1153T1	161.505	17.22	1	6	6	7	5.6666e+06	540	59.8657	6.3667
Cfra_3276T1	Cfra_3276T1	189.301	51.01	1	6	6	8	5.18519e+07	149	16.7849	4.22119
Cfra_3489T1	Cfra_3489T1	174.438	13.54	1	6	6	7	1.35019e+07	805	85.9719	4.71631
Cfra_4754T1	Cfra_4754T1	229.37	11.19	1	6	6	8	1.46114e+07	1046	110.674	4.80518
Cfra_8402T1	Cfra_8402T1	177.87	33.22	2	6	6	8	1.34799e+07	307	35.4317	5.57959
CON_00009865.2	SWISS-PROT:P13645 Tax_Id=9606 Gene_Symbol=KRT10 Keratin, type I cytoskeletal 10	163.344	13.49	32	5	7	7	1.16377e+07	593	59.4749	5.21143
CON_00707857.2	SWISS-PROT:P02453 TREMBL:Q95ND9 ENSEMBL:ENSBTAP00000017420 REFSEQ:NP_001029211 (Bos taurus) Gene_Symbol=COL1A1 Collagen alpha-1(I) chain	77.3379	3.08	1	5	5	6	2.52743e+07	1463	138.854	5.78271
Cfra_2685T1	Cfra_2685T1	215.258	25	2	5	5	8	5.29414e+07	276	29.8434	4.80518
Cfra_1829T1	Cfra_1829T1	100	7.16	1	5	5	5	6.05026e+06	992	111.121	5.41455
Cfra_2200T1	Cfra_2200T1	182.229	25.94	2	5	5	8	2.4935e+07	266	28.5744	4.64014
Cfra_8556T1	Cfra_8556T1	209.09	15.98	1	5	5	6	8.45261e+06	438	48.6368	4.53857
Cfra_5389T1	Cfra_5389T1	146.833	24.82	1	5	5	7	3.74312e+07	274	30.1544	6.32861
Cfra_0288T1	Cfra_0288T1	201.258	11.3	1	5	5	6	1.83932e+07	602	67.5666	4.79248
Cfra_3230T1	Cfra_3230T1	127.953	16.03	1	5	5	6	1.64961e+07	599	64.1775	5.5542
CON_Trypsin	SWISS-PROT:P00761 TRYP_PIG Trypsin - Sus scrofa (Pig).	226.209	27.27	1	4	4	7	5.8593e+09	231	24.3938	7.18115
CON_00293665.7	SWISS-PROT:P04259 Tax_Id=9606 Gene_Symbol=KRT6B Keratin, type II cytoskeletal 6B	131.987	9.04	23	4	5	5	2.23904e+07	564	59.9623	8.00146
Cfra_6708T1	Cfra_6708T1	89.6041	28.86	1	4	4	4	1.17899e+08	149	15.1834	6.44287
Cfra_7186T1	Cfra_7186T1	127.921	8.03	2	4	4	5	6.91774e+06	710	79.0154	4.84326
Cfra_5013T1	Cfra_5013T1	115.864	18.3	1	4	4	6	2.23447e+07	235	25.3589	8.22119
Cfra_7262T1	Cfra_7262T1	106.09	9.75	3	4	4	4	6.61015e+06	523	58.4786	5.03369
Cfra_7788T1	Cfra_7788T1	117.868	10.71	1	4	4	4	7.97314e+06	504	53.5015	6.53662
Cfra_6379T1	Cfra_6379T1	85.9518	20.85	1	4	5	6	3.21982e+07	307	32.9338	5.03369
Cfra_6822T1	Cfra_6822T1	138.653	2.1	1	4	4	4	5.55208e+06	2376	257.351	5.05908
Cfra_7357T1	Cfra_7357T1	166.936	39.09	1	4	4	4	8.96642e+06	220	23.6651	4.98291
Cfra_3666T1	Cfra_3666T1	41.8842	17.75	1	4	4	4	5.7557e+06	338	37.2798	5.32568
Cfra_4129T1	Cfra_4129T1	158.707	27.93	1	4	4	5	2.46445e+07	290	31.7494	4.53857
Cfra_2026T1	Cfra_2026T1	104.937	7.49	1	3	3	4	4.22488e+06	307	34.6208	4.90674
Cfra_4004T1	Cfra_4004T1	156.747	8.01	1	3	3	7	2.66093e+07	412	45.5678	4.76709
Cfra_6586T1	Cfra_6586T1	85.5549	4.29	1	3	3	3	1.34404e+07	1118	118.537	4.36084
Cfra_8100T1	Cfra_8100T1	114.764	43.52	1	3	3	4	1.42224e+07	108	10.8231	3.95459
Cfra_4708T1	Cfra_4708T1	61.6413	5.52	1	3	3	4	7.42866e+06	435	47.3889	4.23389
Cfra_5288T1	Cfra_5288T1	99.8071	11.45	1	3	3	3	1.6745e+07	358	39.1164	6.46826
Cfra_3500T1	Cfra_3500T1	90.5037	7.45	1	3	3	3	1.01646e+07	685	73.7952	6.48096
Cfra_6380T1	Cfra_6380T1	73.3251	17.21	1	3	4	4	2.2101e+07	308	33.1041	4.75439
Cfra_1387T1	Cfra_1387T1	105.632	15.31	1	3	3	5	3.02698e+07	294	31.8924	7.84033
Cfra_6968T1	Cfra_6968T1	67.1691	10.89	2	3	3	3	9.69007e+06	358	38.9856	5.56689
Cfra_8536T1	Cfra_8536T1	172.951	22.81	1	3	3	5	8.85678e+07	114	12.2063	6.75635
Cfra_3621T1	Cfra_3621T1	199.578	38.82	1	3	3	9	1.23434e+07	170	18.093	4.43701
Cfra_7776T1	Cfra_7776T1	79.6404	14.43	2	3	3	3	6.72758e+06	298	32.4225	6.87354
Cfra_6016T1	Cfra_6016T1	75.2137	21.55	1	3	3	3	3.49848e+06	232	26.5712	4.91943
Cfra_5725T1	Cfra_5725T1	144.857	12.43	1	3	3	5	5.47195e+07	362	39.2676	4.03076
CON_00708398.1	SWISS-PROT:P02769 (Bos taurus) Bovine serum albumin precursor	63.3119	3.95	2	2	2	2	3.17104e+06	607	69.2484	6.17627
CON_00708244.1	SWISS-PROT:P02465 ENSEMBL:ENSBTAP00000033771 REFSEQ:NP_776945 (Bos taurus) Gene_Symbol=COL1A2 Collagen alpha-2(I) chain	82.2137	1.91	1	2	2	3	2.69716e+09	1364	128.985	9.14404
CON_00217963.3	SWISS-PROT:P08779 Tax_Id=9606 Gene_Symbol=KRT16 Keratin, type I cytoskeletal 16	103.128	9.09	27	2	4	4	8.92094e+06	473	51.2362	5.04639
Cfra_0155T1	Cfra_0155T1	104.155	7.43	1	2	2	2	1.51638e+07	296	31.5815	5.41455
Cfra_0839T1	Cfra_0839T1	33.6961	3.12	1	2	2	2	3.47393e+06	705	77.9613	4.65283
Cfra_8260T1	Cfra_8260T1	150.126	9.09	2	2	2	4	1.03297e+07	286	31.053	4.77979
Cfra_4649T1	Cfra_4649T1	56.0304	3.26	1	2	2	2	4.94249e+06	614	68.8241	5.13525
Cfra_6434T1	Cfra_6434T1	31.9252	14.63	1	2	2	2	4.92411e+06	205	22.7266	6.52197
Cfra_1166T1	Cfra_1166T1	56.1852	4.04	1	2	2	2	3.40283e+06	495	53.5888	6.23975
Cfra_6243T1	Cfra_6243T1	873.932	56.18	3	2	11	30	4.10952e+09	283	30.0584	6.0874
Cfra_7455T1	Cfra_7455T1	43.3519	8.89	1	2	2	2	1.2728e+07	270	29.6383	5.66846
Cfra_7846T1	Cfra_7846T1	75.5691	16.74	1	2	3	3	2.91471e+07	221	22.7065	4.36084
Cfra_4548T1	Cfra_4548T1	98.7179	6.54	2	2	2	2	4.69996e+06	306	34.5822	4.06885
Cfra_2780T1	Cfra_2780T1	145.379	44.62	4	2	3	4	1.31387e+08	381	42.5699	7.57666
Cfra_4512T1	Cfra_4512T1	56.7289	7.87	1	2	2	3	2.17903e+07	254	27.464	5.10986
Cfra_5812T1	Cfra_5812T1	28.6236	13.64	1	2	2	2	2.9668e+06	220	24.6916	5.2749
Cfra_6096T1	Cfra_6096T1	73.3509	22.58	1	2	2	2	3.79978e+06	155	16.4536	7.54736
Cfra_3042T1	Cfra_3042T1	65.9419	6.07	1	2	2	2	1.57312e+07	461	50.0157	5.09717
Cfra_6386T1	Cfra_6386T1	62.5719	11.81	1	2	2	2	8.18644e+06	254	26.8988	6.58057
Cfra_2380T1	Cfra_2380T1	43.9671	7.44	1	2	2	3	7.12748e+06	524	56.9017	4.85596
Cfra_0852T1	Cfra_0852T1	68.7119	7.42	1	2	2	2	4.24636e+06	458	49.626	6.55127
Cfra_3721T1	Cfra_3721T1	43.938	6.49	1	2	2	3	3.55627e+07	524	56.9214	4.89404
Cfra_1862T1	Cfra_1862T1	76.7737	13.19	1	2	2	3	1.41194e+07	288	31.3153	4.32275
CON_00726431.1	REFSEQ:XP_879643 (Bos taurus) Gene_Symbol=UBC ubiquitin C isoform 12	62.3418	32.61	1	1	2	3	5.87868e+07	690	77.5228	7.66455
CON_00384444.5	SWISS-PROT:P02533 Tax_Id=9606 Gene_Symbol=KRT14 Keratin, type I cytoskeletal 14	102.655	5.3	28	1	3	3	8.80304e+06	472	51.5894	5.16064
CON_00721270.3	SWISS-PROT:P05785 ENSEMBL:ENSBTAP00000036252 REFSEQ:XP_881090 (Bos taurus) Gene_Symbol=KRT14 keratin 19 isoform 8	89.925	5.24	30	1	3	3	8.19018e+06	477	51.8487	5.16064
CON_00710056.3	ENSEMBL:ENSBTAP00000038799 REFSEQ:XP_583270 (Bos taurus) Gene_Symbol=APOB apolipoprotein B	19.83	0.13	1	1	1	1	38224746	4575	515.946	6.78564
CON_00731432.2	SWISS-PROT:P04258 (Bos taurus) Similar to Collagen alpha 1(III) chain	39.93	0.75	1	1	1	1	11460679	1466	138.354	6.43018
CON_00703110.1	SWISS-PROT:P63103 ENSEMBL:ENSBTAP00000000289 REFSEQ:NP_777239 (Bos taurus) Gene_Symbol=YWHAZ 14-3-3 protein zeta/delta	26.33	3.27	6	1	1	1	4.25298e+06	245	27.7277	4.79248
CON_00688100.4	ENSEMBL:ENSBTAP00000017505 REFSEQ:NP_001001135 (Bos taurus) Gene_Symbol=COL2A1 collagen, type II, alpha 1 isoform 1	29.7	0.74	1	1	1	1	2.73902e+07	1490	142.127	7.45947
Cfra_3449T1	Cfra_3449T1	21.03	0.46	1	1	1	1	1.18423e+07	1313	144.319	7.94287
Cfra_2768T1	Cfra_2768T1	25.89	1.17	1	1	1	1	8.25743e+06	515	58.3596	7.26904
Cfra_7272T1	Cfra_7272T1	23.56	0.41	1	1	1	1	1.13347e+07	1451	161.196	8.86572
Cfra_2843T1	Cfra_2843T1	27.93	0.98	2	1	1	1	2.33964e+06	613	67.4151	9.5835
Cfra_3837T1	Cfra_3837T1	37.44	1.05	2	1	1	1	17663786	570	63.0169	6.23975
Cfra_5567T1	Cfra_5567T1	23.44	4.12	1	1	1	1	1.70406e+06	170	19.1144	8.17725
Cfra_2539T1	Cfra_2539T1	22.93	4.76	2	1	1	1	7.98187e+06	147	16.7911	7.85498
Cfra_3693T1	Cfra_3693T1	30.75	1.09	1	1	1	1	7.15035e+06	645	74.637	6.49365
Cfra_7221T1	Cfra_7221T1	86.9274	7.05	1	1	2	5	1.33324e+08	298	31.9556	5.57959
Cfra_6534T1	Cfra_6534T1	24.84	1.09	1	1	1	1	2.17855e+06	644	73.4008	7.21045
Cfra_7391T1	Cfra_7391T1	31.05	1.76	1	1	1	1	2.01483e+07	398	44.6844	4.52588
Cfra_7641T1	Cfra_7641T1	22.95	0.67	1	1	1	1	8.39914e+06	900	101.308	6.60986
Cfra_1297T1	Cfra_1297T1	29.58	0.51	1	1	1	1	2.31389e+07	1385	152.954	6.91748
Cfra_5297T1	Cfra_5297T1	23.88	0.39	1	1	1	1	1.02111e+07	1781	197.712	6.0874
Cfra_6234T1	Cfra_6234T1	1132.88	59.12	3	1	12	36	4.27953e+09	296	31.6821	6.52197
Cfra_7376T1	Cfra_7376T1	1458.88	58.53	3	1	12	44	4.27953e+09	299	31.9274	6.52197
Cfra_7429T1	Cfra_7429T1	20.99	1.69	1	1	1	1	1.79611e+06	472	50.484	4.58936
Cfra_0684T1	Cfra_0684T1	50.84	2.94	1	1	1	1	4031244	340	38.3573	6.46826
Cfra_3499T1	Cfra_3499T1	159.556	11.26	1	1	2	3	4.71578e+08	222	22.9866	4.03076
Cfra_8452T1	Cfra_8452T1	34.99	5.47	3	1	1	1	6.3837e+06	201	22.2822	5.43994
Cfra_4564T1	Cfra_4564T1	77.1303	2.07	1	1	2	2	3.22553e+07	920	101.493	4.84326
Cfra_4801T1	Cfra_4801T1	27.19	11	1	1	1	1	1.85994e+07	100	10.6056	6.04932
Cfra_5166T1	Cfra_5166T1	20.9	1.24	1	1	1	1	5.81448e+06	725	80.9413	9.20264
Cfra_8438T1	Cfra_8438T1	43.66	1.25	1	1	1	1	3.35995e+06	802	89.0576	5.13525
Cfra_3745T1	Cfra_3745T1	28.96	0.72	1	1	1	1	864604	1385	151.83	6.49365
Cfra_7648T1	Cfra_7648T1	44.75	2.11	1	1	1	1	4.43896e+06	473	51.7767	4.97021
Cfra_7251T1	Cfra_7251T1	70.2	1.56	1	1	1	1	2.98626e+06	706	76.0097	5.21143
Cfra_2040T1	Cfra_2040T1	30.77	3.61	1	1	1	1	2.59214e+06	305	34.923	5.50342
Cfra_3702T1	Cfra_3702T1	41.17	2.82	1	1	1	1	1.80946e+06	425	47.9962	8.68994
Cfra_5973T1	Cfra_5973T1	24.557	1.66	1	1	1	2	6.79047e+06	723	79.5857	5.17334
Cfra_0574T1	Cfra_0574T1	23.52	4.74	1	1	1	1	6.57977e+06	274	29.1658	7.98682
Cfra_0952T1	Cfra_0952T1	45.2	2.16	1	1	1	1	2.00383e+06	647	72.4414	5.60498
Cfra_0261T1	Cfra_0261T1	28.76	4.19	1	1	1	1	1.26332e+06	334	36.8561	4.89404
Cfra_0792T1	Cfra_0792T1	46.31	10.92	1	1	1	1	947604	119	13.292	8.47021
Cfra_6627T1	Cfra_6627T1	34.44	12.73	1	1	1	1	4.18274e+06	110	11.5124	7.91357
Cfra_2782T1	Cfra_2782T1	68.61	2.75	1	1	1	1	2.63232e+06	436	50.9216	5.24951
Cfra_2549T1	Cfra_2549T1	43.16	5.15	1	1	1	1	2.64565e+06	272	29.6374	7.7085
Cfra_0645T1	Cfra_0645T1	64.92	2.85	1	1	1	1	2.42495e+07	527	58.9412	4.91943
Cfra_7075T1	Cfra_7075T1	111.192	8.77	1	1	1	2	3.29352e+07	171	18.5713	3.99268
Cfra_1194T1	Cfra_1194T1	32.27	8.15	2	1	1	1	2.82756e+06	184	20.7275	6.06201
Cfra_6174T1	Cfra_6174T1	92.29	6.9	1	1	1	1	7.70998e+06	232	25.5749	7.26904
Cfra_6331T1	Cfra_6331T1	84.25	0.72	1	1	1	1	3.07193e+06	1932	219.491	5.30029
Cfra_6866T1	Cfra_6866T1	24.65	6.16	1	1	1	1	1.07966e+07	276	30.3986	5.43994
Cfra_1587T1	Cfra_1587T1	40.14	5.12	1	1	1	1	1.08565e+07	332	35.265	5.74463
Cfra_3377T1	Cfra_3377T1	38.79	7.14	1	1	1	1	4.95732e+06	252	27.4146	4.18311
Cfra_6360T1	Cfra_6360T1	35.13	1.01	1	1	1	1	2.37247e+06	1782	195.066	5.26221
Cfra_6946T1	Cfra_6946T1	39.6	4.89	1	1	1	1	2.28044e+06	368	38.4308	4.53857
Cfra_6517T1	Cfra_6517T1	58.06	4.76	1	1	1	1	1.4813e+07	357	39.4173	5.26221
Cfra_1231T1	Cfra_1231T1	51.8419	9.41	1	1	1	2	6.63698e+06	202	21.7873	8.80713
Cfra_4128T1	Cfra_4128T1	22.03	7.72	1	1	1	1	4.44251e+06	272	31.2217	4.44971
Cfra_2213T1	Cfra_2213T1	42.07	7.26	1	1	1	1	5.36395e+06	303	32.54	4.86865
Cfra_2284T1	Cfra_2284T1	92.35	7.54	1	1	1	2	6.55494e+06	252	28.455	4.53857
Cfra_0694T1	Cfra_0694T1	31.0919	8.97	4	1	1	2	5.6678e+06	234	26.1479	5.99854
Cfra_3810T1	Cfra_3810T1	33.56	4.51	1	1	1	1	1.9564e+06	510	54.7862	5.80811
Cfra_6911T1	Cfra_6911T1	76.2019	12.5	1	1	1	2	11653737	160	17.4246	5.19873
Cfra_7615T1	Cfra_7615T1	26.23	4.83	1	1	1	1	9.96166e+06	476	53.1018	5.16064
Cfra_6296T1	Cfra_6296T1	34.68	7.82	1	1	1	1	1.2965e+07	307	33.6523	5.52881
Cfra_4890T1	Cfra_4890T1	26.21	15.1	1	1	1	1	3.88363e+06	192	21.9531	6.78564
Cfra_1840T1	Cfra_1840T1	50.81	6.07	1	1	1	1	4.02667e+07	494	54.1977	4.57666
Cfra_2101T1	Cfra_2101T1	51.4719	10.42	1	1	1	2	2.57303e+07	288	31.4667	4.52588
Cfra_7151T1	Cfra_7151T1	23.98	10.41	1	1	1	1	1.36297e+07	317	35.7545	6.27783

## Sheet: Peptides
A2	Sequence	# PSMs	# Proteins	# Protein Groups	Protein Group Accessions	Modifications	ΔCn	Area	IonScore	Exp Value	Charge	MH+ [Da]	ΔM [ppm]	RT [min]	# Missed Cleavages
High	VATVSLPR	2	1	1	CON_Trypsin		0	17477916846	55.37	5.80805e-06	2	842.51	0.260951	48.2582	0
High	GEAGPAGPAGPAGPR	1	1	1	CON_00708244.1		0	5.3544e+09	58.29	6.3007e-06	2	1261.63	-0.391568	34.5677	0
High	IVGGVPVTER	1	3	3	Cfra_6234T1;Cfra_6243T1;Cfra_7376T1		0	4.93134e+09	50.83	1.19776e-05	2	1026.59	-0.827896	45.2312	0
High	VSSSYSHQLK	1	5	4	Cfra_6234T1;Cfra_6243T1;Cfra_7376T1;Cfra_6582T1		0	4.69177e+09	49.66	3.73095e-05	2	1135.57	-0.291625	28.176	0
High	IGMTTQSGNDYLHK	2	1	1	Cfra_6582T1		0	3.28665e+09	59.03	3.18816e-06	2	1564.74	0.941229	48.9534	0
High	IVGGVAVTER	1	1	1	Cfra_6582T1		0	3.27957e+09	69.96	3.48192e-07	2	1000.58	-0.824436	43.1751	0
High	IVLHSGYNSNSLANDIAMIR	6	2	2	Cfra_6234T1;Cfra_7376T1		0	3.21546e+09	86.13	1.59677e-08	2	2188.12	0.654016	90.6696	0
High	IPFMVSLNDPR	2	1	1	Cfra_6582T1		0	2.87533e+09	31.24	0.00308165	3	1288.67	-0.270324	89.3154	0
High	IGMTTQSGNDYMHK	2	3	3	Cfra_6234T1;Cfra_6243T1;Cfra_7376T1		0	2.70543e+09	54.63	5.16525e-06	2	1582.7	-0.232118	43.7678	0
High	RGYPGVNTR	2	4	4	Cfra_6234T1;Cfra_6243T1;Cfra_7376T1;Cfra_6582T1		0	2.65222e+09	38.4	0.000390269	2	1019.54	-0.60627	30.6912	1
Medium	VAEIAVLR	1	0	0			0	2.15041e+09	13.68	0.0514258	2	870.541	-0.237045	52.7594	0
High	IVLHSGYDSSILANDIAMIR	25	1	1	Cfra_6582T1		0	2.1154e+09	78.87	6.61561e-08	2	2188.15	1.652	99.9456	0
High	LVGIVSWGQGcAR	1	3	3	Cfra_6234T1;Cfra_6243T1;Cfra_7376T1	C11(Carbamidomethyl)	0	1.26854e+09	61.02	3.75572e-06	2	1402.73	0.221467	79.9647	0
High	VSSFIDWMNNTMDNN	4	1	1	Cfra_6582T1		0	1.03717e+09	56.79	2.44431e-06	2	1787.74	0.378605	113.063	0
High	DWVVTAAHcLYGR	2	6	4	Cfra_6234T1;Cfra_6243T1;Cfra_7376T1;Cfra_6582T1	C9(Carbamidomethyl)	0	9.24528e+08	61.78	2.09079e-06	2	1547.74	0.356791	86.6507	0
High	ATLNPGSLAGVNIDAAK	2	1	1	Cfra_3499T1		0	9.131e+08	90.15	3.28457e-09	2	1611.87	0.462759	78.2902	0
High	VSSFIDWMDDTMANN	2	1	1	Cfra_7376T1		0	9.11367e+08	101.19	8.87474e-11	2	1745.72	3.15003	119.607	0
High	LVAIVSWGQGcAR	3	1	1	Cfra_6582T1	C11(Carbamidomethyl)	0	8.94539e+08	92.12	2.36298e-09	2	1416.74	1.23558	81.7318	0
High	GKDScQGDSGGPVVAPGSDGR	2	3	3	Cfra_6234T1;Cfra_6243T1;Cfra_7376T1	C5(Carbamidomethyl)	0	7.81891e+08	67.89	2.03194e-07	2	2002.89	0.0249805	33.7063	1
High	VVPDQLQAVK	1	1	1	Cfra_1701T1		0	731773610	22	0.00736471	2	1096.64	-0.431852	50.6687	0
High	IVGGIPVYEK	1	1	1	Cfra_1701T1		0	6.57804e+08	48.06	4.7676e-05	2	1074.62	-0.44408	60.4847	0
High	IGMTTQSGNDYmHK	4	3	3	Cfra_6234T1;Cfra_6243T1;Cfra_7376T1	M12(Oxidation)	0	5.86794e+08	57.72	1.97313e-06	2	1598.69	0.125743	35.6148	0
High	ISDVVVHPNYNSNYITNDIALLR	4	1	1	Cfra_1701T1		0	5.81366e+08	56.84	9.31564e-06	3	2630.36	1.56368	97.8727	0
High	IGmTTQSGNDYLHK	2	1	1	Cfra_6582T1	M3(Oxidation)	0	4.97625e+08	48.55	3.35128e-05	2	1580.74	-0.716531	38.0607	0
High	ILGYPTHAEFVTEALMSGGAK	4	1	1	Cfra_4119T1		0	4.95285e+08	98.18	7.75479e-10	2	2192.11	1.1316	97.0534	0
High	QILLATFDQTIHQVEK	3	1	1	Cfra_4119T1		0	4.8944e+08	83.98	1.39981e-08	2	1884.02	1.11172	98.3971	0
Medium	VSSFIGWMDDTMANN	1	1	1	Cfra_6234T1		0	4.32726e+08	18.98	0.0147624	2	1687.71	0.357346	115.762	0
Medium	FScVRFHPNGDTMVTGDDSGR	1	0	0		C3(Carbamidomethyl)	0	417451674	14.91	0.0376839	3	2355.02	-2.74773	30.4622	1
High	IVLHSGYNSNSLANDIAmIR	5	2	2	Cfra_6234T1;Cfra_7376T1	M18(Oxidation)	0	3.82297e+08	79.43	5.4732e-08	2	2204.12	1.51636	85.9702	0
High	RQILLATFDQTIHQVEK	1	1	1	Cfra_4119T1		0	3.63104e+08	52	1.73513e-05	3	2040.12	-0.348659	88.7131	1
High	VSSFISWMDDTMANN	1	1	1	Cfra_6243T1		0	3.60551e+08	39.1	0.0001436	2	1717.72	1.23888	119.038	0
High	NVcTYTR	1	3	3	Cfra_6234T1;Cfra_6243T1;Cfra_7376T1	C3(Carbamidomethyl)	0	3.41515e+08	27.72	0.00197313	2	913.419	-0.179663	29.1288	0
High	QVGIVSFGQK	1	1	1	Cfra_1701T1		0	3.39505e+08	44.36	0.000150239	2	1062.59	-0.790436	61.8251	0
Medium	SLILASGLDQLEK	1	1	1	Cfra_4568T1		0	3.38541e+08	28.48	0.0048248	2	1386.78	0.294247	91.7612	0
High	EVGDFLSDLADK	2	1	1	Cfra_4119T1		0	3.20154e+08	41.76	0.000176704	2	1308.63	-0.16957	130.935	0
High	VDALSTR	2	1	1	Cfra_1701T1		0	3.17614e+08	33.04	0.00302921	2	761.416	0.37116	31.0839	0
High	VSQYMDWIEYTVQNN	4	1	1	Cfra_1701T1		0	2.86069e+08	91.93	9.29754e-10	2	1889.84	2.56183	111.782	0
High	VDIDSLGLIDPTTNSPK	2	1	1	Cfra_4568T1		0	2.6282e+08	70.44	3.47905e-07	2	1784.93	0.444329	90.7902	0
High	TSTcQYVYGNTMVTSK	1	2	2	Cfra_6234T1;Cfra_7376T1	C4(Carbamidomethyl)	0	2.5258e+08	64.31	7.04293e-07	2	1839.83	1.48012	58.6326	0
High	VYTVSTSTDFYPASGAMDDWLYDHVASVAK	2	1	1	Cfra_7050T1		0	2.47352e+08	48.59	3.45892e-05	3	3296.51	0.858134	113.934	0
High	IFITPSSNPDGYEYTFTATEDNPEPR	3	1	1	Cfra_7050T1		0	2.42019e+08	71.27	1.4929e-07	2	2961.35	0.819561	91.9979	0
High	NVcTYTPGK	1	1	1	Cfra_6582T1	C3(Carbamidomethyl)	0	2.38323e+08	32.78	0.00139716	2	1039.49	-0.838197	34.0216	0
Medium	TYSVSTSTDFYPAAGAMDDWLYDHAR	2	1	1	Cfra_7049T1		0	2.335e+08	21.47	0.00832062	3	2940.28	1.14888	107.154	0
High	TDALIYLGGER	1	1	1	Cfra_4568T1		0	2.32921e+08	76.72	7.87411e-08	2	1207.63	-0.420754	77.1778	0
High	GTAPGDSGGPLILAGPDNAVHGGTVVGLVSLGADNVLYPDIAVR	1	2	1	Cfra_3417T1		0	2.28407e+08	57.03	4.06213e-06	3	4182.19	1.54921	121.029	0
High	ELADLITNLK	1	1	1	Cfra_4547T1		0	2.2821e+08	54.15	1.57683e-05	2	1129.65	0.034173	90.5692	0
High	IGMTSQSADDYLHK	3	1	1	Cfra_7221T1		0	227492590	31.87	0.00143029	2	1565.73	1.3233	49.562	0
High	VSSFIDWmNNTMDNN	4	1	1	Cfra_6582T1	M8(Oxidation)	0	2.25322e+08	35.69	0.000314888	2	1803.73	0.555018	92.2813	0
High	IDQTSWANVAYVAGHSWSK	4	1	1	Cfra_1091T1		0	2.19973e+08	76.23	8.45723e-08	2	2120.02	1.23258	94.4259	0
High	VSSFIDWmDDTMANN	8	1	1	Cfra_7376T1	M8(Oxidation)	0	1.88468e+08	38.14	0.000179125	2	1761.71	0.94961	105.287	0
Medium	IISGEVPR	1	0	0			0	1.87006e+08	16.12	0.0366515	2	870.505	0.128506	51.0499	0
High	ILQLFEQSYVK	1	1	1	Cfra_7087T1		0	1.77546e+08	30.77	0.00175881	2	1367.76	0.917567	91.2628	0
Medium	EQVPGWVIER	1	1	1	Cfra_6437T1		0	1.7406e+08	20.47	0.0233331	2	1212.64	-0.467594	75.6988	0
High	LLGYFYLDLHPR	4	1	1	Cfra_4119T1		0	148864574	64.64	1.4773e-06	2	1506.81	0.614274	98.9976	0
High	TLADYNIQK	1	4	1	Cfra_2780T1		0	1.46839e+08	40.2	0.000334247	2	1065.56	-0.218407	48.3621	0
Medium	EVFGILK	1	1	1	Cfra_7049T1		0	1.40148e+08	16.61	0.0327409	2	805.482	-0.0784785	74.4518	0
High	DFVEAPSQMLENWcWEK	3	2	1	Cfra_4119T1	C14(Carbamidomethyl)	0	1.39484e+08	72.65	6.34097e-08	3	2168.94	0.782974	113.71	0
High	TITLDVESSDTIDNVK	1	4	1	Cfra_2780T1		0	1.37046e+08	85.12	1.67647e-08	2	1749.88	0.878549	75.2996	0
Medium	KAYYAK	1	0	0			0	1.36747e+08	17.15	0.0318042	2	743.405	-5.15001	20.4498	1
Medium	IIGGAPVTER	1	1	1	Cfra_3159T1		0	135823570	21.77	0.0103117	2	1012.58	-0.633834	42.3562	0
High	ILAQIDDILAK	1	1	1	Cfra_8536T1		0	1.33081e+08	68.66	1.58912e-07	2	1212.72	-0.490979	91.7659	0
Medium	LTISSQK	1	1	1	Cfra_4568T1		0	1.32434e+08	22.72	0.0173733	2	776.452	0.483507	30.1211	0
High	IPFMVSLNDPTWGSNGFHYcGGSLINK	1	3	3	Cfra_6234T1;Cfra_6243T1;Cfra_7376T1	C20(Carbamidomethyl)	0	1.29451e+08	35.82	0.000785455	3	3011.42	0.938168	107.754	0
High	TLITEIK	1	1	1	Cfra_4119T1		0	1.2871e+08	34.15	0.000653806	2	817.503	-0.00490977	55.9406	0
Medium	SNAGLLNK	1	1	1	Cfra_4119T1		0	127412156	18.94	0.058078	2	816.457	-0.207415	32.4518	0
High	AVINITDK	1	1	1	Cfra_6708T1		0	1.24978e+08	48.96	5.27288e-05	2	873.504	0.377554	47.7681	0
High	VNASLLNLHK	2	1	1	Cfra_4547T1		0	1.24944e+08	62.91	6.39602e-07	2	1108.65	-0.307623	54.5528	0
High	AAVHSPELALPAFK	2	1	1	Cfra_8536T1		0	1.24059e+08	36.13	0.000609453	2	1450.81	0.332527	78.7331	0
High	ELADLITNLKR	2	1	1	Cfra_4547T1		0	1.23752e+08	42.76	0.000105933	2	1285.75	0.0893585	81.8974	1
High	ISDVLTHQLK	2	1	1	Cfra_3159T1		0	1.23043e+08	49.08	1.73033e-05	2	1153.66	-0.169087	49.3776	0
High	TAEENNDAQMTDFIDDFLLEQVNAQK	1	1	1	Cfra_4547T1		0	1.20929e+08	36.87	0.000421458	3	2999.36	2.44453	129.876	0
High	TVVVHEGTDDFGK	1	1	1	Cfra_6708T1		0	1.16213e+08	33.29	0.00114859	3	1403.68	0.245303	42.661	0
High	TPSFLQTTR	1	1	1	Cfra_7050T1		0	1.14709e+08	44.82	0.00014338	2	1050.56	-0.545163	56.6456	0
High	SYNEIVER	1	1	1	Cfra_7050T1		0	113672981	44.9	9.54601e-05	2	1009.49	-0.796549	42.8814	0
High	YYVSSVTSDPGALHR	1	1	1	Cfra_6846T1		0	1.1344e+08	59.86	3.45975e-06	3	1651.81	-0.16782	55.471	0
High	HIALSGK	1	1	1	Cfra_6708T1		0	1.12505e+08	27.81	0.00314596	2	725.431	0.233415	21.5149	0
High	SDISDVIVHPK	2	1	1	Cfra_3159T1		0	1.12322e+08	67.75	4.36489e-07	2	1209.65	-0.44072	55.2067	0
High	ESTLHLVLR	2	5	2	CON_00726431.1;Cfra_2780T1		0	1.10277e+08	48.83	2.68382e-05	2	1067.62	-0.14821	60.4243	0
High	AVLVADFDSPTGAILEATNPEEQVVR	3	1	1	Cfra_7087T1		0	1.08178e+08	71.73	3.02143e-07	3	2741.4	1.14491	107.143	0
High	IGmTTQSGNDYmHK	2	3	3	Cfra_6234T1;Cfra_6243T1;Cfra_7376T1	M3(Oxidation); M12(Oxidation)	0	1.06334e+08	25.61	0.00320742	2	1614.69	-0.506284	27.3788	0
High	IADQALLFQPDVILGGGLK	2	1	1	Cfra_3807T1		0	1.05304e+08	32.42	0.000668584	2	1968.12	0.967676	116.146	0
High	YSIGYSHTDSSTTTQK	4	1	1	Cfra_6432T1		0	104481192	62.94	8.63871e-07	2	1775.81	0.827049	38.7996	0
High	TYDEIVDR	1	1	1	Cfra_7049T1		0	1.04119e+08	49.39	2.24406e-05	2	1010.48	-0.384052	45.9966	0
High	GIWHQVFAMDNSGSTSSQTYTEK	3	1	1	Cfra_6432T1		0	103076799	57.31	3.25116e-06	2	2574.16	1.29301	80.8301	0
High	VGMLTQSENDYLHR	2	1	1	Cfra_3159T1		0	1.02432e+08	45.77	8.21035e-05	2	1662.79	-0.316762	64.0296	0
High	RVGGDSLGLYLFDQQLHK	1	1	1	Cfra_4547T1		0	1.00577e+08	49.88	4.16347e-05	3	2046.08	-0.40048	90.0953	1
High	HVVcHPDFSTR	1	1	1	Cfra_5725T1	C4(Carbamidomethyl)	0	9.84188e+07	31.8	0.00211422	3	1354.63	-1.51757	34.5942	0
High	YAGGAAIAVIYLPFER	3	1	1	Cfra_7087T1		0	9.7763e+07	51.28	2.19696e-05	2	1710.92	1.42287	114.279	0
Medium	IEYLAITTNEEK	1	1	1	Cfra_7087T1		0	9.71792e+07	21.27	0.0276186	2	1423.73	0.473427	69.3384	0
High	DWVLTAAHcVYGR	2	1	1	Cfra_1701T1	C9(Carbamidomethyl)	0	9.70889e+07	69.45	3.57528e-07	2	1547.74	0.435661	83.3943	0
High	YQHGYHIGIVAK	1	2	2	Cfra_3806T1;Cfra_3807T1		0	9.66396e+07	43.27	0.000183681	3	1385.73	0.121115	42.7121	0
High	LKDPAPK	1	1	1	Cfra_4765T1		0	9.59539e+07	28.18	0.00177483	2	768.462	0.412845	21.6211	1
High	WSVEAGSSFK	1	1	1	Cfra_6432T1		0	9.51947e+07	33.32	0.00125708	2	1097.53	-0.184711	62.2736	0
High	STGSVDLIDATGTK	1	1	1	Cfra_1091T1		0	9.3758e+07	51.02	3.36038e-05	2	1364.69	-0.0557519	58.8066	0
Medium	LMSEHYLTGEPIPDEMIDNLVASK	2	1	1	Cfra_4119T1		0	9.14635e+07	27.38	0.00758662	3	2702.31	0.391629	107.046	0
Medium	DDVALPGFR	1	1	1	Cfra_4547T1		0	91404496	27.81	0.00612635	2	989.505	-0.511432	73.1227	0
High	DYLHTSK	1	1	1	Cfra_1701T1		0	88818309	36.68	0.000934306	2	863.425	-0.357486	29.2397	0
High	AEWIEFISLPFNK	1	1	1	Cfra_6846T1		0	8.86133e+07	69.26	5.57311e-07	2	1593.83	1.22107	123.761	0
High	LGEHNIDVLEGNEQFINAAK	2	1	1	CON_Trypsin		0	8.7105e+07	80.84	3.91466e-08	2	2211.11	1.28438	81.9067	0
Medium	RVPGNTSGWEK	1	1	1	Cfra_7049T1		0	8.66003e+07	26.12	0.00806332	2	1230.62	-0.508246	34.1385	1
Medium	VVTDLR	1	1	1	Cfra_6846T1		0	8.63451e+07	31.8	0.00455878	2	702.415	0.311996	33.8603	0
High	VSEIVIHPGYSVDDQYATNDIAMIR	1	1	1	Cfra_3417T1		0	8.57615e+07	60.51	3.7791e-06	3	2806.37	1.06817	89.7469	0
High	VNQGTVLNVIR	1	1	1	Cfra_7049T1		0	8.46467e+07	81.94	1.31146e-08	2	1212.71	0.124504	67.9552	0
High	INAWDISYYQSK	2	1	1	Cfra_4119T1		0	8.28095e+07	83.59	1.20319e-08	2	1487.72	0.689375	81.5159	0
High	VSSYIDWIK	1	1	1	Cfra_4765T1		0	8.14539e+07	52.38	1.24291e-05	2	1110.58	-0.84861	87.2476	0
Medium	GDSGGPLILPGK	1	1	1	Cfra_4765T1		0	7.963e+07	16.09	0.0442866	2	1110.61	-0.675012	60.3669	0
High	ATAIEMR	1	1	1	Cfra_7049T1		0	78955139	36.8	0.00115956	2	791.409	0.714719	35.3315	0
High	KYEIVDTAYK	1	1	1	Cfra_6846T1		0	7.82726e+07	68.89	4.97119e-07	2	1229.64	0.216153	47.6006	1
High	GGHDDSLTTGHAGGR	1	1	1	Cfra_6708T1		0	7.72492e+07	25.49	0.00395483	3	1437.65	-0.446625	23.4433	0
High	IIGGDAITDER	1	2	1	Cfra_3417T1		0	7.40679e+07	57.63	5.52268e-06	2	1159.6	0.397978	51.37	0
High	WGGNGFHYcGGSLINK	3	1	1	Cfra_6582T1	C9(Carbamidomethyl)	0	7.33737e+07	53.28	1.08076e-05	2	1766.81	0.826257	71.0309	0
High	LAIESGASTIEcDAAITK	1	1	1	Cfra_6437T1	C12(Carbamidomethyl)	0	7.2824e+07	53.09	2.25818e-05	2	1849.92	1.4111	75.3088	0
Medium	VDTAEVFADLSTSIWGIDQPENTNMPASFGHLAGGYDAR	3	1	1	Cfra_4119T1		0	7.19489e+07	17.75	0.0394519	4	4152.93	2.20934	128.948	0
High	VSSFIGWMDDTmANN	1	1	1	Cfra_6234T1	M12(Oxidation)	0	7.17017e+07	42.69	6.28284e-05	2	1703.71	1.18916	103.072	0
High	NEEFDGK	1	1	1	Cfra_4119T1		0	7.07187e+07	25.25	0.00348462	2	838.358	-0.226342	26.9037	0
High	SDATVASLNK	1	1	1	Cfra_3417T1		0	70339622	40.06	0.00045862	2	1005.52	-0.116962	34.9611	0
High	LWYAGWGR	1	1	1	Cfra_4765T1		0	69597590	47.35	8.92774e-05	2	1008.5	-0.725074	84.1387	0
Medium	KLSEATDEK	1	0	0			0	6.90977e+07	18.76	0.0312657	2	1020.52	0.866007	31.2243	1
High	FSVATEGIR	1	1	1	Cfra_3564T1		0	6.89002e+07	50.79	2.37599e-05	2	979.521	-0.0334687	55.9276	0
High	GAALIAPEETFLSYK	1	1	1	Cfra_6437T1		0	6.65818e+07	36.17	0.000917875	2	1609.85	0.117035	96.2628	0
High	NILSNMSWTK	1	1	1	Cfra_6432T1		0	6.46315e+07	34.84	0.001378	2	1193.6	-0.661464	83.9807	0
High	AEAYSGVSSMSK	1	1	1	Cfra_7049T1		0	6.45864e+07	50.13	1.13281e-05	2	1216.55	-0.435971	40.5019	0
High	VDVYEK	1	2	1	Cfra_4119T1		0	6.45418e+07	31.58	0.00107729	2	752.383	0.369179	30.1293	0
High	FSDASTMSK	2	1	1	Cfra_7050T1		0	6.38804e+07	41.06	9.14441e-05	2	973.43	0.105569	31.8354	0
High	SLTINVPAGATANILQR	6	2	1	Cfra_6432T1		0	6.20747e+07	67.9	2.51381e-07	2	1738.98	0.722321	83.9132	0
Medium	HYcGGTLIAK	1	1	1	Cfra_4765T1	C3(Carbamidomethyl)	0	6.19416e+07	25.7	0.0098241	2	1119.56	-0.00380841	35.4415	0
Medium	QNFASASENHINDQINVELTAAYHYLSAAAYFNR	1	1	1	Cfra_4547T1		0	6.1561e+07	19.52	0.0346228	4	3842.82	0.562756	128.704	0
High	HMYPDEGQSEK	1	1	1	Cfra_7050T1		0	6.09433e+07	22.7	0.00626839	2	1320.55	-0.279942	30.2699	0
High	NSAILEELVTLR	2	1	1	Cfra_4119T1		0	6.01233e+07	65.73	8.01902e-07	2	1357.77	-0.103909	107.873	0
High	DTDSEEEIIEAFR	2	1	1	Cfra_3276T1		0	5.97056e+07	59.58	1.32185e-06	2	1553.7	-0.673916	97.1384	0
High	NIFLTETGLSFK	2	1	1	Cfra_3564T1		0	5.95506e+07	43.12	0.000143821	2	1369.74	0.00171817	99.1691	0
High	GLFLSQR	1	1	1	Cfra_4568T1		0	5.85954e+07	36.6	0.000940737	2	820.467	-0.178526	59.4715	0
High	VGGDSLGLYLFDQQLHK	1	1	1	Cfra_4547T1		0	5.8251e+07	49.7	4.98256e-05	2	1889.98	1.01872	98.4118	0
Medium	DWVMTAAHcLYGR	1	2	2	Cfra_6379T1;Cfra_6380T1	C9(Carbamidomethyl)	0	5.74226e+07	15.78	0.0369937	2	1579.72	0.791624	90.3903	0
High	NNWVNVLPDNTNVGTVFGAAK	2	2	2	Cfra_3806T1;Cfra_3807T1		0	5.74158e+07	71.45	3.04361e-07	2	2230.13	1.24028	101.771	0
High	FPLLNDIALIR	2	1	1	Cfra_4765T1		0	5.72742e+07	52.83	1.12057e-05	2	1284.77	0.191859	112.45	0
Medium	VHTVFEQFK	1	1	1	Cfra_1091T1		0	5.70473e+07	27.48	0.00759257	3	1134.59	-0.581929	58.9231	0
High	WVTAYTTFPILSFK	1	1	1	Cfra_4568T1		0	5.58837e+07	53.8	1.70916e-05	2	1673.9	0.82317	118.759	0
High	IAGIVSWGQGcAR	1	1	1	Cfra_3159T1	C11(Carbamidomethyl)	0	5.56671e+07	32.86	0.00232923	2	1374.69	0.173557	73.3602	0
High	IVLHSGYNSNSMANDIAmIR	4	1	1	Cfra_6243T1	M18(Oxidation)	0	5.51113e+07	46.18	7.47071e-05	3	2222.07	0.20298	78.5259	0
High	SDAIVPK	1	2	2	Cfra_3806T1;Cfra_3807T1		0	54889229	45.64	4.63926e-05	2	729.414	-0.000227708	31.3327	0
High	EADIDGDGQINYEEFVK	1	1	1	Cfra_3276T1		0	5.44051e+07	39.78	0.000220912	2	1941.87	1.28515	85.3009	0
High	LVSWGSPR	1	3	1	Cfra_2685T1		0	5.35726e+07	42.44	0.0001739	2	901.489	0.124284	52.463	0
High	KGDVLYVIR	1	1	1	Cfra_7050T1		0	5.30733e+07	40.88	0.000167399	2	1062.63	-0.793276	56.996	1
High	VINDNDPIPSLPTEAMGYK	1	1	1	Cfra_2685T1		0	5.30446e+07	32.46	0.00184452	2	2074.02	1.73175	89.9263	0
High	TSFTVSR	1	1	1	Cfra_7049T1		0	5.30245e+07	32.96	0.000657572	2	797.415	-0.0157615	37.4641	0
Medium	AGTLLFNNVSVK	1	1	1	Cfra_8133T1		0	5.26051e+07	20.56	0.0228546	2	1262.71	-0.0939433	78.064	0
High	GGSAIFLQVAK	2	1	1	Cfra_8133T1		0	5.25219e+07	47.09	6.74247e-05	2	1090.62	-0.601281	72.5531	0
High	GVIDNFKIGK	1	1	1	Cfra_3806T1		0	5.25219e+07	40.04	0.000346791	2	1090.63	-0.2655	72.7248	1
High	GGGIAQVLASWYYQQGTFNTIK	3	1	1	Cfra_2685T1		0	5.2207e+07	67.63	8.71548e-07	2	2402.21	0.26888	124.241	0
Medium	LDDNSR	1	0	0			0	5.15017e+07	18.86	0.0273036	2	719.336	6.20017	40.0172	0
High	NIAHVPTLLISYER	3	1	1	Cfra_4775T1		0	5.08774e+07	28.66	0.00381205	2	1625.9	0.467247	85.043	0
Medium	NSILAPGGSR	1	2	1	Cfra_4119T1		0	5.06297e+07	24.33	0.0066416	2	971.527	-0.395711	39.9957	0
High	VEGSYPQAYEVTLAYPHVFAISR	2	1	1	Cfra_4119T1		0	5.05789e+07	41.87	0.00029906	3	2597.31	0.665947	99.754	0
Medium	QEQPAK	1	0	0			0	5.05637e+07	16.09	0.0344451	2	700.363	0.890121	15.3142	0
Medium	YSIGYSHTDSTTNTEK	2	1	1	Cfra_5389T1		0	5.03699e+07	19.49	0.0131267	3	1803.8	0.340849	39.5689	0
Medium	FWEPKPEDLISTFK	2	1	1	Cfra_1091T1		0	4.94939e+07	26.6	0.00984493	2	1736.89	0.615599	100.185	0
High	TWIWR	1	1	1	Cfra_6846T1		0	49267382	34	0.000577255	2	761.409	0.157769	74.9784	0
Medium	EKADQEKR	1	0	0			0	4.8266e+07	19.08	0.0451121	2	1003.52	-0.953279	39.1459	2
Medium	IGmTSQSADDYLHK	1	1	1	Cfra_7221T1	M3(Oxidation)	0	47652209	22.25	0.0113176	3	1581.72	-1.6192	38.4027	0
High	GVIDNFQIGK	2	1	1	Cfra_3807T1		0	4.58788e+07	56.87	1.1513e-05	2	1090.59	0.0822465	72.8924	0
High	TESDTLTDGVVVGIVSWGR	3	1	1	Cfra_5725T1		0	4.57015e+07	52.48	2.48572e-05	2	1991.01	1.34529	109.341	0
High	VSSFISWMDDTmANN	2	1	1	Cfra_6243T1	M12(Oxidation)	0	4.55137e+07	50.1	1.14066e-05	2	1733.72	0.42875	106.687	0
Medium	ESTVLTHQVHVGMNSQSDR	1	1	1	Cfra_1701T1		0	4.54266e+07	23.06	0.0138407	3	2125.01	-0.565917	46.462	0
High	FTGVTcGGGDVER	1	1	1	Cfra_7087T1	C6(Carbamidomethyl)	0	4.53332e+07	50.45	1.71299e-05	2	1354.61	2.32314	43.2419	0
Medium	DSVFVSLNENK	1	1	1	Cfra_4765T1		0	4.49412e+07	17.97	0.0566537	2	1251.62	-0.375474	66.8242	0
High	NAMDSLVEFLGR	1	1	1	Cfra_4119T1		0	4.47404e+07	79.51	4.47775e-08	2	1351.67	0.351454	114.661	0
High	LVFFVWAPDTAK	1	1	1	Cfra_3337T1		0	4.45452e+07	47.03	7.62888e-05	2	1393.75	0.7819	110.11	0
High	AHVENIK	2	1	1	Cfra_7050T1		0	4.42788e+07	34.26	0.00056246	2	810.447	-0.270793	9.13087	0
High	SLDLDSIIAEVK	2	6	1	CON_00220327.3		0	4.42397e+07	54.66	1.29952e-05	2	1302.72	-0.0428418	108.33	0
Medium	IVGGAPVAK	1	2	1	Cfra_4765T1		0	4.39847e+07	23.74	0.00493351	2	811.503	-0.328733	31.7479	0
High	NTYAYSGLDASGQIR	1	1	1	Cfra_7049T1		0	4.24536e+07	42.84	0.000114399	2	1615.77	-0.425778	63.434	0
Medium	KSNAGLLNK	1	1	1	Cfra_4119T1		0	4.20827e+07	25.13	0.0130433	2	944.552	-0.760106	24.7721	1
High	DLGLSNIYDFNGER	1	1	1	Cfra_7087T1		0	4.15542e+07	59.53	2.34002e-06	2	1612.76	0.642852	94.558	0
High	aDQLTEEQIAEFK	1	1	1	Cfra_3276T1	N-Term(Acetyl)	0	4.1445e+07	30.52	0.00288326	2	1563.75	0.354122	89.9215	0
High	NSASDGGAIHIAR	2	1	1	Cfra_8133T1		0	41417716	65.41	1.07902e-06	2	1268.63	0.0580486	36.0522	0
Medium	EPNAEAFLISK	1	1	1	Cfra_4119T1		0	4.12165e+07	25.16	0.0100581	2	1218.64	-0.316175	75.3394	0
Medium	LGSAPVTTcSQ	1	1	1	Cfra_1387T1	C9(Carbamidomethyl)	0	4.11726e+07	18.63	0.0246759	2	1120.53	-1.54681	40.647	0
High	TDLAPANPWHAFEAR	2	1	1	Cfra_4568T1		0	4.07225e+07	41.44	0.000251228	2	1695.83	1.67851	82.1018	0
High	LTPLGDQEMASLLALK	2	1	1	Cfra_4119T1		0	4.0696e+07	52.18	1.99762e-05	2	1699.93	0.932304	108.803	0
High	GDSGGPLILPGKNDDISSGVQVGIVSWSSR	2	1	1	Cfra_4765T1		0	4.06752e+07	53.89	1.42912e-05	3	2997.53	1.2567	98.167	1
High	AWLDEHITTGSAKPDAEVEPEEAEGSHEEL	1	1	1	Cfra_1840T1		0	4.02667e+07	50.81	1.6597e-05	3	3276.49	1.63967	76.7584	0
Medium	WESDcVRLAFDSIK	1	0	0		C5(Carbamidomethyl)	0	4.01703e+07	19.86	0.0345975	2	1725.82	-1.11989	91.9357	1
High	AEYLQAANVEMMAPGK	1	1	1	Cfra_6846T1		0	4.00708e+07	62	2.08216e-06	2	1722.82	-0.16143	77.8511	0
High	GPAGPQGPR	1	1	1	CON_00707857.2		0	4.00653e+07	31.15	0.00188004	2	836.437	0.0528772	22.3402	0
High	KLMYLTIGMTTLK	2	2	1	Cfra_3417T1		0	4.00328e+07	69.82	2.55368e-07	2	1512.85	-0.524123	89.9665	1
High	GPAGPSGPAGK	2	1	1	CON_00708244.1		0	3.9919e+07	32.13	0.00116347	2	895.463	-0.235639	21.2893	0
High	NDVALIR	2	2	2	Cfra_3159T1;Cfra_7221T1		0	3.91558e+07	39.88	0.000349526	2	800.463	0.0633544	45.596	0
High	FSSGLGMFTYTK	1	1	1	Cfra_3564T1		0	3.89136e+07	61.53	1.93345e-06	2	1338.64	0.393801	86.3055	0
High	TYSLGSAVLNK	1	1	1	Cfra_4775T1		0	3.84573e+07	42.43	0.000174301	2	1152.63	-0.254506	63.1197	0
Medium	HILNIK	1	1	1	CON_00710056.3		0	38224746	19.83	0.0121382	2	737.467	-0.0228163	29.5679	0
High	TSTcQYVYGNTmVTSK	1	2	2	Cfra_6234T1;Cfra_7376T1	C4(Carbamidomethyl); M12(Oxidation)	0	37861563	67.73	1.96859e-07	2	1855.82	-0.0681166	50.1962	0
High	ILGYPTHAEFVTEALmSGGAK	1	1	1	Cfra_4119T1	M16(Oxidation)	0	3.78179e+07	43.41	0.000189255	3	2208.1	0.434922	88.4274	0
High	VSSFIDWmNNTmDNN	1	1	1	Cfra_6582T1	M8(Oxidation); M12(Oxidation)	0	3.75288e+07	45.83	3.04899e-05	2	1819.73	0.527085	85.96	0
High	NKYEDEINKR	1	13	2	CON_00220327.3;CON_00293665.7		0	3.7467e+07	41.18	0.000327694	3	1308.65	-0.000603853	32.067	2
High	LMYLTIGMTTLK	1	2	1	Cfra_3417T1		0	3.74227e+07	67.63	5.26381e-07	2	1384.76	0.48472	101.414	0
High	SGFAEVVLHPELSR	2	1	1	Cfra_4765T1		0	3.73739e+07	59.36	3.8819e-06	2	1540.81	0.267494	79.5059	0
Medium	GLNLDSDRK	1	1	1	Cfra_5013T1		0	3.73318e+07	25.37	0.0151009	2	1017.53	-0.6648	32.3793	1
High	TVSYYSQDSWSTSQEK	1	1	1	Cfra_6432T1		0	3.72458e+07	53.31	5.44698e-06	2	1895.83	0.570006	59.7	0
Medium	ITGVAIGNPNAPMAVYMNcGIHAR	1	1	1	Cfra_7050T1	C19(Carbamidomethyl)	0	3.713e+07	23.91	0.0168674	3	2527.24	0.818846	86.9881	0
Medium	VLPLGLSDLQATLcNLKK	1	1	1	Cfra_3721T1	C14(Carbamidomethyl)	0	3.6767e+07	16.09	0.033215	3	1983.13	-0.417169	111.068	1
High	AITFHcDSPR	2	1	1	Cfra_4512T1	C6(Carbamidomethyl)	0	3.64593e+07	45.05	4.22021e-05	2	1203.56	-2.04726	39.8355	0
Medium	DPSQLmTK	1	0	0		M6(Oxidation)	0	3.64435e+07	18.51	0.0486205	2	935.447	-3.7216	42.3521	0
High	MDDLAEVYR	1	2	2	Cfra_4568T1;Cfra_4564T1		0	3.62252e+07	56.91	3.66668e-06	2	1111.51	-0.268805	63.6197	0
Medium	LVVNDGNYHDTLTSATGLWEDVVGR	1	1	1	Cfra_4129T1		0	3.59091e+07	21.29	0.0308353	3	2731.34	1.25075	109.044	0
High	MAAYFDGLLSETSYPK	2	1	1	Cfra_4004T1		0	3.53452e+07	45.4	7.35428e-05	2	1792.85	0.861545	100.079	0
High	VMEDFHSLR	2	1	1	Cfra_1091T1		0	3.46628e+07	27.99	0.00389194	2	1133.54	-0.0372434	51.3349	0
High	GGGIAMLLASWYHQQGSFNTIK	1	1	1	Cfra_2200T1		0	3.45739e+07	53.15	2.20298e-05	3	2379.2	1.61204	118.356	0
High	LQFTAEQLDGVSEDFIASLTK	5	1	1	Cfra_4119T1		0	3.45141e+07	70.52	3.9922e-07	2	2312.17	1.30071	128.041	0
High	TTGQLcVPFSDTSLMK	1	1	1	Cfra_3721T1	C6(Carbamidomethyl)	0	3.43584e+07	28.51	0.00387554	2	1784.86	1.81588	90.442	0
Medium	YPGAYEVQEMK	1	1	1	Cfra_5389T1		0	3.41915e+07	20.7	0.0178739	2	1314.6	-0.0533595	58.6616	0
High	HSLcDLEYTTDILTRPELASK	2	1	1	Cfra_6437T1	C4(Carbamidomethyl)	0	3.41811e+07	50.36	4.55623e-05	3	2462.22	0.514233	88.3851	0
High	MQTVDGEYR	1	1	1	Cfra_7049T1		0	3.38449e+07	42.09	9.57925e-05	2	1098.49	0.0834687	37.983	0
Medium	LFHTDAVQcPWTDTPTEDK	1	1	1	Cfra_6437T1	C9(Carbamidomethyl)	0	3.33251e+07	18.69	0.0256894	3	2261.02	-0.745134	72.0753	0
High	DDITGcVAVVQVIDR	2	1	1	Cfra_7075T1	C6(Carbamidomethyl)	0	3.29352e+07	72.03	1.84851e-07	2	1659.84	0.630823	88.3121	0
High	LYSLAENNNQVSLVELPGATSEGRK	1	1	1	Cfra_7049T1		0	3.20191e+07	43.47	0.000211397	3	2689.38	0.970033	84.8123	1
High	ENEAIDDGYGSR	1	1	1	Cfra_7087T1		0	3.19071e+07	35.96	0.000295907	2	1325.56	-1.01215	39.2895	0
High	VFDKDGNGFISAAELR	2	1	1	Cfra_3276T1		0	3.15984e+07	40.69	0.000354037	3	1738.87	-0.679341	77.1822	1
High	LYSLAENNNQVSLVELPGATSEGR	2	1	1	Cfra_7049T1		0	3.1442e+07	65.34	1.43283e-06	2	2561.28	-0.78755	92.2864	0
Medium	SADcSGAPLASVSTSK	1	1	1	Cfra_7846T1	C4(Carbamidomethyl)	0	3.10519e+07	18.42	0.0388476	2	1537.71	-1.17718	44.8247	0
High	HSLTSTEWSHLQR	1	1	1	Cfra_2200T1		0	3.06475e+07	31.21	0.00276244	3	1581.78	-0.914493	49.3238	0
High	SGKPYLIMVEASEIDWAGHSNDPASIVR	2	1	1	Cfra_3807T1		0	3.05494e+07	38.9	0.000528182	4	3042.5	0.185109	102.846	0
High	TSTIEFENAPSFIDYGPADNR	2	1	1	Cfra_4775T1		0	3.04381e+07	49	2.83258e-05	2	2344.07	0.690758	94.3498	0
High	VSSFIDWmDDTmANN	1	1	1	Cfra_7376T1	M8(Oxidation); M12(Oxidation)	0	3.02821e+07	36.8	0.000243869	2	1777.71	0.505463	89.8138	0
High	VccQWSGK	1	2	2	Cfra_3499T1;Cfra_7846T1	C2(Carbamidomethyl); C3(Carbamidomethyl)	0	3.00564e+07	44.15	4.48906e-05	2	1024.43	-0.767481	34.1025	0
High	APWDYSGVR	1	1	1	Cfra_1091T1		0	2.9941e+07	31.72	0.00211988	2	1050.5	-0.531025	63.5395	0
High	LSPTLEDILTVVAGK	1	1	1	Cfra_6671T1		0	2.99377e+07	59.42	3.08577e-06	2	1555.89	0.301832	125.66	0
Medium	KSSEEEHEHAQSFIDYQNK	1	1	1	Cfra_4547T1		0	2.93451e+07	20.11	0.0136499	4	2306.03	-1.031	40.6321	1
High	THNLEPYFESFINNLR	2	1	1	CON_00220327.3		0	2.92811e+07	49.74	4.83071e-05	3	1993.98	0.677137	111.92	0
High	AFGGWHYVNK	2	1	1	Cfra_4004T1		0	2.9107e+07	47.27	5.15623e-05	2	1178.57	-0.039897	57.1564	0
High	YLQGMLGSYR	1	1	1	Cfra_4119T1		0	2.90624e+07	34.53	0.000880927	2	1187.59	0.432081	72.8464	0
High	LLPWVEGcIAEGEK	1	1	1	Cfra_5288T1	C8(Carbamidomethyl)	0	2.87355e+07	36.54	0.00067655	2	1600.81	0.812185	93.8541	0
High	IVScNDDAVQSFEWIGSNLR	3	1	1	Cfra_1387T1	C4(Carbamidomethyl)	0	2.84959e+07	67.28	6.64092e-07	2	2310.09	1.2914	106.427	0
Medium	YVPAGTYEYTTSPcLQK	1	1	1	Cfra_6846T1	C14(Carbamidomethyl)	0	2.83133e+07	22.2	0.0147627	2	1977.93	1.86252	64.8726	0
High	DIENQYETQITQIEHEVSSSGQEVQSSAK	1	1	1	CON_00019359.3		0	2.82867e+07	77.58	5.06288e-08	3	3264.52	1.95666	104.244	0
High	DGVLLTDETK	1	1	1	Cfra_4564T1		0	28285328	34.82	0.00140084	2	1090.56	0.0829291	56.438	0
Medium	LSVDYGK	1	0	0			0	2.82172e+07	17.18	0.0468993	2	781.409	0.0434036	34.7477	0
High	GDVLYVIR	1	1	1	Cfra_7050T1		0	2.79453e+07	35.27	0.000861783	2	934.535	-0.314965	69.9806	0
High	FHIGPcGINLPHVHPR	2	1	1	Cfra_1862T1	C6(Carbamidomethyl)	0	2.78723e+07	32.71	0.00222356	4	1850.96	-0.439966	70.8553	0
High	SSEEEHEHAQSFIDYQNK	1	1	1	Cfra_4547T1		0	2.7794e+07	33.03	0.000580973	3	2177.94	-0.217029	45.9322	0
High	SLTIDVPAGAIANIIQR	2	1	1	Cfra_5389T1		0	2.77322e+07	56.77	3.47123e-06	2	1752	0.842456	108.287	0
High	FLEQQNQVLQTK	1	8	1	CON_00220327.3		0	2.75944e+07	32.69	0.00226073	2	1475.79	0.168561	56.5864	0
High	KFDAIFHVGGR	2	1	1	Cfra_8133T1		0	2.74688e+07	38.85	0.000632036	3	1246.67	-0.0150238	63.1797	1
High	NLAQWVAVNIVcGDIDHMGK	1	1	1	Cfra_2646T1	C12(Carbamidomethyl)	0	2.74211e+07	39.88	0.000370086	3	2240.1	0.600614	119.69	0
Medium	GPPGPVGPSGK	1	1	1	CON_00688100.4		0	2.73902e+07	29.7	0.00487541	2	949.51	-0.236934	30.3515	0
High	ASSVVVSGTDIK	1	1	1	Cfra_1735T1		0	27231849	50.49	4.10921e-05	2	1162.63	-0.678175	45.7029	0
High	DVVTFSGHSR	1	1	1	Cfra_2685T1		0	2.65033e+07	42.49	0.000225455	2	1104.54	-0.580478	39.0905	0
Medium	FLDTANHPLVAcNIDASQDPYLAGK	1	1	1	Cfra_2752T1	C12(Carbamidomethyl)	0	2.64776e+07	25.33	0.0121632	3	2730.32	0.940267	81.5755	0
High	ENTcVDAGIASFK	1	1	1	Cfra_7846T1	C4(Carbamidomethyl)	0	26332952	40.09	0.000181206	2	1411.65	0.514574	64.9072	0
High	IGIIGVTTPDTVTLASPSK	2	1	1	Cfra_2752T1		0	2.63189e+07	50.78	1.92189e-05	2	1870.05	0.657552	89.191	0
Medium	SLNNQFASFIDK	1	2	1	CON_00220327.3		0	2.63023e+07	25.34	0.0118428	2	1383.69	0.524928	87.3881	0
Medium	YAGGAAIAVIYLPESSHIFIQGK	1	1	1	Cfra_3230T1		0	2.6213e+07	28.75	0.0044673	3	2405.29	0.820677	105.326	0
High	GEAGPSGPAGPTGAR	1	1	1	CON_00707857.2		0	2.61957e+07	34.06	0.00119757	2	1281.62	0.0331078	31.8578	0
High	GEAcIPK	1	1	1	Cfra_0155T1	C4(Carbamidomethyl)	0	2.59956e+07	45.62	4.24944e-05	2	774.382	0.186078	29.8948	0
Medium	FTSTGHTGTDINIYAHPPLDPFYNGLR	1	1	1	Cfra_3807T1		0	2.59882e+07	28.86	0.00650085	4	3004.46	0.484797	94.0482	0
High	NVIEAVVPSVVAVSK	1	1	1	Cfra_3564T1		0	2.59241e+07	26.22	0.00346233	2	1510.88	-0.916909	90.6225	0
High	KDVVEPEVEPVIEPEEAVVEPEVETVVEPK	2	1	1	Cfra_2101T1		0	2.57303e+07	45.42	0.000113396	3	3342.71	1.3423	97.9358	1
High	aSGVAVSDQVVQIYDSIK	1	1	1	Cfra_3337T1	N-Term(Acetyl)	0	2.56353e+07	45.29	0.000127195	2	1920.99	0.192878	118.297	0
High	GFYTEDANAWR	1	2	2	Cfra_3806T1;Cfra_3807T1		0	2.55032e+07	25.77	0.0030914	2	1329.59	-0.204885	70.6808	0
High	AAGAMDLITGYR	2	1	1	Cfra_3621T1		0	2.54142e+07	81.71	2.46203e-08	2	1238.62	-0.0425673	79.9738	0
Medium	VESEATAVEGGESTEAAEPAAPR	1	0	0			0	2.52322e+07	16.23	0.052411	2	2258.05	2.17059	51.0994	0
High	IVLHSGYNSNSMANDIAMIR	3	1	1	Cfra_6243T1		0	2.5097e+07	88.59	4.7733e-09	2	2206.08	0.810568	82.5291	0
High	AMDEDGLLEK	1	1	1	Cfra_2685T1		0	2.48244e+07	44.8	5.2981e-05	2	1120.52	-0.589981	55.4623	0
High	YIHGTVNIDGYYIGNEASEGR	1	1	1	Cfra_8133T1		0	2.4759e+07	35.89	0.000669844	3	2328.09	1.00707	76.7686	0
Medium	DNIcTFTAGK	1	2	1	Cfra_3417T1	C4(Carbamidomethyl)	0	24740535	14.83	0.0542605	2	1126.52	-1.05015	51.759	0
Medium	LGGGQDNK	1	0	0			0	2.47339e+07	14.38	0.0425751	2	788.389	-0.999108	21.3812	0
High	WELLQQVDTSTR	2	1	1	CON_00220327.3		0	2.43339e+07	72.4	2.76211e-07	2	1475.75	0.00519461	84.6977	0
High	GNNPFGEIDDETTTK	1	1	1	Cfra_0645T1		0	2.42495e+07	64.92	4.8316e-07	2	1637.73	-0.0499871	67.5419	0
High	TYSVSTSTDFYPAAGAmDDWLYDHAR	1	1	1	Cfra_7049T1	M17(Oxidation)	0	2.39487e+07	23.82	0.00484346	3	2956.28	0.98395	92.2334	0
Medium	TVRPVFER	1	1	1	Cfra_4775T1		0	23831563	18.21	0.057383	2	1003.57	-0.531745	39.3753	0
High	WDLDLELDSAR	1	1	1	Cfra_3807T1		0	2.35825e+07	35.28	0.000874625	2	1332.64	0.383438	95.3123	0
High	VDVLDSQFFR	1	1	1	Cfra_8133T1		0	2.35283e+07	54.01	1.31073e-05	2	1225.62	-0.862024	92.0276	0
High	DWVLTAGHcVR	2	1	1	Cfra_4765T1	C9(Carbamidomethyl)	0	2.34956e+07	57.53	6.09283e-06	2	1313.64	-0.434121	62.9456	0
High	VDSDFAEFWTVEYFNSYK	2	1	1	Cfra_6846T1		0	2.34734e+07	63.53	5.17793e-07	2	2246.99	-0.22375	123.766	0
High	MPAYNLDLVDITAEGFK	2	1	1	Cfra_8133T1		0	2.33823e+07	71.04	3.14818e-07	2	1896.94	1.70501	110.887	0
Medium	TAEENNDAQmTDFIDDFLLEQVNAQK	1	1	1	Cfra_4547T1	M10(Oxidation)	0	2.33622e+07	24.17	0.00727367	3	3015.36	1.18293	116.096	0
High	NGVLLTDETK	1	1	1	Cfra_4568T1		0	2.33357e+07	38.83	0.000634953	2	1089.58	-0.130776	47.3024	0
High	QMITSKK	1	1	1	Cfra_1297T1		0	2.31389e+07	29.58	0.00385539	2	835.467	-4.54456	46.5277	1
High	FLEVLGLLSYVR	2	1	1	Cfra_6846T1		0	2.29536e+07	71.47	9.97994e-08	2	1408.82	-0.0351234	131.176	0
High	VFLNYDILER	1	1	1	Cfra_0288T1		0	2.2869e+07	33.11	0.00168585	2	1281.68	-0.0373578	95.1851	0
High	FVPYVILER	1	1	1	Cfra_2752T1		0	2.21367e+07	34.39	0.00100077	2	1135.65	0.320069	90.4614	0
High	SNAGLLNKR	1	1	1	Cfra_4119T1		0	21939553	54.86	8.98117e-06	2	972.558	-0.660499	29.1365	1
High	TLNDYEAIATFGESPSHAVVSSK	2	1	1	Cfra_4754T1		0	2.18792e+07	36.29	0.000951601	3	2423.17	0.646323	84.0811	0
High	VHIGMSAHTK	1	1	1	Cfra_6379T1		0	2.18618e+07	37.53	0.000547472	3	1080.56	1.18849	28.23	0
High	ANHTVFMGAWSLER	1	1	1	Cfra_6437T1		0	2.18258e+07	46.33	7.44989e-05	3	1618.78	-0.437709	83.8465	0
Medium	SFDDIASEVHK	1	1	1	Cfra_3807T1		0	2.18168e+07	21.96	0.0149647	3	1247.59	0.484293	57.5802	0
High	NLDLDSIIAEVK	1	10	1	CON_00293665.7		0	2.17907e+07	43.46	0.000191597	2	1329.73	-0.252453	108.167	0
Medium	KFIADGDEVK	1	1	1	Cfra_1735T1		0	2.17327e+07	26.58	0.00824197	2	1121.58	0.114662	37.8927	1
High	DFVEAPSQmLENWcWEK	2	2	1	Cfra_4119T1	M9(Oxidation); C14(Carbamidomethyl)	0	2.16394e+07	56.49	2.61912e-06	2	2184.94	1.54636	98.2452	0
High	VYTVSTSTDFYPASGAmDDWLYDHVASVAK	3	1	1	Cfra_7050T1	M17(Oxidation)	0	2.15853e+07	58	3.16979e-06	3	3312.51	1.76261	101.947	0
Medium	LmSEHYLTGEPIPDEMIDNLVASK	2	1	1	Cfra_4119T1	M2(Oxidation)	0	2.15678e+07	23.6	0.0172424	3	2718.3	0.957679	104.167	0
Medium	LRSEIDNVKK	1	3	1	CON_00220327.3		0	2.14965e+07	27.97	0.00590475	3	1201.69	-0.0218517	28.1212	2
High	DDTSYHIEGIDFENAK	2	1	1	Cfra_8133T1		0	2.13719e+07	33.39	0.000572677	2	1853.82	1.12694	76.8	0
Medium	KVDFESAPTEGHPLMLQDNEPVLPSYNFEGLK	1	1	1	Cfra_3489T1		0	2.133e+07	21.65	0.0294082	4	3601.76	1.5603	97.7546	1
Medium	ATTcDTNFSDQQWK	1	1	1	Cfra_1387T1	C4(Carbamidomethyl)	0	2.11408e+07	19.25	0.0138725	2	1701.72	0.758191	56.7854	0
High	EIETYHNLLEGGQEDFESSGAGK	1	1	1	CON_00019359.3		0	2.0986e+07	38.28	0.000289757	3	2510.13	0.801929	79.1757	0
High	IVLHSGYDSSILANDIAmIR	6	1	1	Cfra_6582T1	M18(Oxidation)	0	2.08425e+07	90.04	5.69728e-09	2	2204.14	1.73174	96.1305	0
High	NDDISSGVQVGIVSWSSR	2	1	1	Cfra_4765T1		0	2.08405e+07	79.74	4.61838e-08	2	1905.93	1.62327	89.0059	0
High	MFITPSANPDGYEYTWTATSQNSSPR	2	1	1	Cfra_7049T1		0	2.08232e+07	66.52	3.11981e-07	2	2921.31	0.158176	91.7051	0
High	SNVDINVAHQGK	1	1	1	Cfra_3042T1		0	20819556	52.35	2.21199e-05	2	1281.65	-0.707818	35.3033	0
High	VSQYmDWIEYTVQNN	2	1	1	Cfra_1701T1	M5(Oxidation)	0	2.07244e+07	56.48	2.81132e-06	2	1905.84	1.55756	98.8106	0
High	EITGLQDLFDMSK	1	1	1	Cfra_4129T1		0	2.05988e+07	57.97	4.62805e-06	2	1496.73	0.944512	108.103	0
High	AVHGQHEDILLALDVLFK	2	1	1	Cfra_6437T1		0	2.03613e+07	87.36	5.05048e-09	3	2018.11	0.422164	118.017	0
Medium	GLIANNR	1	1	1	Cfra_8133T1		0	2.02567e+07	23.11	0.00708546	2	757.432	0.261355	30.6512	0
Medium	SAGAYDSITR	1	1	1	Cfra_4775T1		0	20191934	20.51	0.0168948	2	1040.5	-1.38022	39.2197	0
High	DWVLTAAHcVDGR	2	1	1	Cfra_3159T1	C9(Carbamidomethyl)	0	2.01549e+07	81.01	1.902e-08	2	1499.71	0.770563	76.0855	0
High	IPDPEDK	1	1	1	Cfra_7391T1		0	2.01483e+07	31.05	0.00113859	2	813.398	-0.686345	32.2928	0
High	YIEWINSIIPESSYR	1	1	1	Cfra_5725T1		0	2.00384e+07	68.21	4.68125e-07	2	1869.94	1.48361	110.523	0
High	VVDSNSDINPK	1	1	1	Cfra_6586T1		0	2.00065e+07	50.8	2.03782e-05	2	1187.59	0.0575367	31.8095	0
High	LYSVANDNEQVSIVQLPGFSYEGR	2	1	1	Cfra_7050T1		0	2.00009e+07	30.18	0.00450918	2	2685.32	1.41593	103.658	0
High	TSYDSTNWMWSISAEK	1	1	1	Cfra_4775T1		0	1.96697e+07	32.5	0.000702927	2	1905.83	1.16538	96.9456	0
High	RGMAEVSSHTAYIGMITK	1	1	1	Cfra_4765T1		0	1.95595e+07	35.98	0.000996775	3	1951.97	0.10059	64.0143	1
High	LVLADGVSYATR	1	1	1	Cfra_6671T1		0	1.95238e+07	35.05	0.00078152	2	1264.69	-0.392814	69.626	0
Medium	DASVYYDK	1	0	0			0	1.94926e+07	15.07	0.0363208	2	960.437	6.39086	25.7848	0
High	sTAELAcSYAALILHDDDAEISAENIEK	2	1	1	Cfra_8100T1	N-Term(Acetyl); C7(Carbamidomethyl)	0	1.90207e+07	59.74	3.132e-06	3	3091.44	0.246322	123.044	0
High	NILSQMSWTK	1	2	1	Cfra_5389T1		0	1.88216e+07	54.23	1.47253e-05	2	1207.61	-0.573405	85.628	0
Medium	IFTAGAVGFPGIMHLTESEGYK	1	1	1	Cfra_5595T1		0	1.87902e+07	30.53	0.0046026	3	2325.16	0.494498	103.156	0
High	IPFmVSLNDPTWGSNGFHYcGGSLINK	1	3	3	Cfra_6234T1;Cfra_6243T1;Cfra_7376T1	M4(Oxidation); C20(Carbamidomethyl)	0	1.87141e+07	34.09	0.00120882	3	3027.42	1.92739	101.707	0
High	HVKPSVSVGEK	1	1	1	Cfra_4801T1		0	1.85994e+07	27.19	0.00372421	3	1166.65	0.0389157	26.1666	0
Medium	EYYGGGGAVWIHEVPTGNSVTIEK	1	1	1	Cfra_8133T1		0	1.808e+07	21.03	0.0291878	3	2563.25	1.97316	83.9653	0
High	GMAEVSSHTAYIGMITK	1	1	1	Cfra_4765T1		0	1.79982e+07	59.17	5.32663e-06	2	1795.88	2.48737	72.0702	0
High	SVAVVVADAADYYTWK	2	1	1	Cfra_0288T1		0	1.79437e+07	77.37	6.13825e-08	3	1757.87	0.00260035	101.829	0
High	NYSPYYNTIDDLKDQIVDLTVGNNK	1	1	1	CON_00019359.3		0	1.78469e+07	31.21	0.0031787	3	2902.41	0.261428	118.663	1
High	cDDTYGGPYPYSEPETQAMQAHVENIK	1	1	1	Cfra_7049T1	C1(Carbamidomethyl)	0	1.78335e+07	40.37	0.00010719	3	3100.33	-1.51752	77.7703	0
High	IITELK	2	2	1	Cfra_3837T1		0	17663786	37.44	0.000838403	2	716.456	0.862413	43.2462	0
High	SKEYDEDEEEASDR	3	1	1	Cfra_8133T1		0	1.76594e+07	63.96	4.68982e-07	2	1701.67	0.147884	30.4403	1
Medium	IVALNDK	1	1	1	Cfra_4775T1		0	1.76371e+07	22.47	0.0203846	2	772.456	-0.190229	35.7291	0
High	AGHDYYTGEK	1	1	1	Cfra_6846T1		0	1.76252e+07	43.39	7.1012e-05	2	1140.5	-0.212516	28.1252	0
Medium	YAVYDFDYTSK	1	1	1	Cfra_3337T1		0	1.74509e+07	16.06	0.0289172	2	1371.61	0.0421849	75.1917	0
Medium	NIASIGHR	1	1	1	Cfra_6437T1		0	1.74474e+07	25.92	0.0043496	2	867.48	0.256636	30.5441	0
Medium	IYGDAIDEASVYPITMHISTVVVNK	1	1	1	Cfra_4129T1		0	1.74257e+07	28.71	0.0057872	3	2735.4	0.647451	102.065	0
High	VDTAEVFADLSTSIWGIDQPENTNmPASFGHLAGGYDAR	2	1	1	Cfra_4119T1	M25(Oxidation)	0	1.73663e+07	58.44	3.22242e-06	3	4168.93	1.97441	125.51	0
High	VPFMASLNDPK	2	1	1	Cfra_6379T1		0	1.73102e+07	34.55	0.00171868	2	1218.62	-0.27531	74.0167	0
High	ASEQGLIDR	1	1	1	Cfra_5288T1		0	1.73044e+07	38.38	0.000624408	2	988.505	-0.746363	38.8042	0
High	HAFVGGSAGSR	1	1	1	Cfra_4775T1		0	1.7218e+07	29.48	0.00264891	2	1045.52	-0.621768	26.1535	0
High	ISDDNSQIEVVK	1	1	1	Cfra_3337T1		0	17138468	42.4	0.000221544	2	1346.68	0.359514	48.4296	0
Medium	GVSFTFGPDVVQK	1	1	1	Cfra_8402T1		0	1.70893e+07	19.35	0.0482001	2	1380.72	0.270021	83.8002	0
High	NRPVYDDDSFSGMGEGISMFEAR	1	1	1	Cfra_1091T1		0	1.70636e+07	42.28	6.90488e-05	3	2580.12	0.934597	96.4143	0
High	YEELQITAGR	1	1	1	CON_00220327.3		0	1.70002e+07	39.91	0.000428795	2	1179.6	-0.379888	57.9102	0
Medium	LTHTITSGSQDLTPQIPIWESYGEDK	1	1	1	Cfra_7076T1		0	1.68437e+07	23.7	0.0196227	3	2916.43	1.56321	92.2282	0
Medium	MSEcYTYGK	1	2	1	Cfra_3417T1	C4(Carbamidomethyl)	0	1.68424e+07	16.89	0.0238867	2	1138.45	-0.207421	39.4957	0
High	YLGDIDIEFDDEGK	1	1	1	Cfra_2752T1		0	1.67816e+07	71	9.27163e-08	2	1628.74	1.80631	90.2383	0
High	FLQVAGIR	1	1	1	Cfra_2752T1		0	1.67513e+07	49.15	3.22289e-05	2	903.541	-0.593618	66.1892	0
High	DGEFVcR	1	1	1	Cfra_6437T1	C6(Carbamidomethyl)	0	1.67448e+07	30.17	0.00112242	2	882.378	0.0847031	37.6262	0
Medium	GGVVATNMHDYGSVLEFDGVFQSNVATTVGGVLSR	2	1	1	Cfra_7087T1		0	1.66101e+07	25.56	0.0108409	3	3583.74	-2.27907	121.346	0
Medium	IATVLQHK	1	1	1	Cfra_3564T1		0	1.65788e+07	21.71	0.00787328	2	909.551	-0.713919	32.2711	0
High	IVGGAPIEEK	1	1	1	Cfra_6379T1		0	1.65688e+07	28.3	0.00236657	2	1012.57	-0.634304	40.8206	0
Medium	GTPVPVEADLNLPPSEHFAIMPVPQVTITVDETVPLR	2	1	1	Cfra_6846T1		0	1.64869e+07	22.56	0.0124791	3	3979.09	-0.184838	117.324	0
Medium	MLQDSLK	1	1	1	Cfra_4568T1		0	1.64864e+07	25.12	0.0121506	2	834.439	-0.364357	42.003	0
High	HGVQELEIELQSQLSK	2	1	1	CON_00019359.3		0	1.64798e+07	56.49	7.29262e-06	2	1837.97	0.0056586	90.8048	0
High	MNNLGIDFSQNLNEVNTK	1	1	1	Cfra_4119T1		0	1.62631e+07	65.68	1.01398e-06	2	2050.99	1.45496	87.1948	0
Medium	LENLEITSLTGNK	1	1	1	Cfra_3230T1		0	1.62509e+07	24.27	0.0162738	2	1431.77	-0.456187	77.8761	0
Medium	AQNAAAAAAGGASLDDDVPDLVDNFDQSQD	1	0	0			0	1.61734e+07	19.5	0.0151472	3	2961.3	0.752335	102.373	0
High	LMYLTIGMTTLKK	2	2	1	Cfra_3417T1		0	1.61618e+07	31.02	0.00193716	3	1512.85	-0.9768	88.5512	1
Medium	ETIFSDPFVAVPK	1	1	1	Cfra_2752T1		0	1.57846e+07	25.63	0.0120352	2	1449.77	3.38005	100.299	0
High	AEFETEMQNLYGVNSIMVIPR	4	1	1	Cfra_4568T1		0	1.57583e+07	35.53	0.00125954	2	2441.19	1.52812	112.76	0
High	VALAGYR	1	1	1	Cfra_4004T1		0	1.53757e+07	45.41	0.000100709	2	749.431	0.307382	42.4977	0
Medium	KGLNLDSDRK	1	1	1	Cfra_5013T1		0	1.52294e+07	18.38	0.0595366	3	1145.63	-0.335207	27.7756	2
High	VGFGEATGK	1	1	1	Cfra_1735T1		0	1.51577e+07	47.46	7.26867e-05	2	865.441	-0.502284	37.5232	0
Medium	VKNNWVNVLPDNTNVGTVFGAAK	1	2	2	Cfra_3806T1;Cfra_3807T1		0	1.50967e+07	27.46	0.00789683	3	2457.29	1.2448	94.4029	1
Medium	LEQWK	1	1	1	Cfra_4775T1		0	15068986	25.58	0.01674	2	703.378	0.760546	35.4495	0
High	KLMYLTIGMTTLKK	1	2	1	Cfra_3417T1		0	1.5063e+07	37.25	0.000339057	3	1640.95	-0.156219	79.3441	2
High	NLIIAITDGMGPTYVALSR	3	1	1	Cfra_3807T1		0	1.50445e+07	63.94	1.41276e-06	2	2005.08	0.736377	116.641	0
High	ANQGGAVNVQGVLGNMIIDGFYR	2	1	1	Cfra_7087T1		0	14813062	78.06	6.17443e-08	2	2393.2	0.00472118	122.935	0
High	SQEDQDKEDEESIEAPK	1	1	1	Cfra_6517T1		0	1.4813e+07	58.06	1.82455e-06	2	1976.86	-0.716806	37.9059	1
High	SSEEEHEHAQSFIDYQNKR	1	1	1	Cfra_4547T1		0	1.47444e+07	28.81	0.00197284	3	2334.04	0.954622	41.8468	1
Medium	VTLEATK	1	1	1	Cfra_6586T1		0	1.45011e+07	26.68	0.00783958	2	761.441	0.206216	31.4359	0
High	FSFEYK	1	1	1	Cfra_5013T1		0	1.44729e+07	26.01	0.00363386	2	820.388	0.0238192	63.4843	0
High	ALDLDWGVAER	1	1	1	Cfra_0288T1		0	1.43671e+07	68.48	4.54098e-07	2	1244.63	-0.432947	87.4027	0
High	SGILEDSLDIK	1	1	1	Cfra_6671T1		0	1.41927e+07	33.37	0.00195609	2	1189.63	0.0250619	81.1193	0
Medium	SDTYSEAEWSER	1	1	1	Cfra_7087T1		0	1.38994e+07	13.22	0.0556104	2	1459.6	0.735065	53.856	0
Medium	FGTALDPIcDK	1	0	0		C9(Carbamidomethyl)	0	1.38469e+07	17.5	0.038233	2	1236.6	6.59592	100.46	0
High	IGIEAITLAALQK	1	1	1	Cfra_4754T1		0	1.38257e+07	62.93	5.94505e-07	2	1340.82	0.739995	102.177	0
Medium	MEELGSITSPR	1	1	1	Cfra_4775T1		0	1.37633e+07	22.54	0.0178299	2	1219.6	-1.28381	58.9616	0
High	ASEHPPAMIILK	1	1	1	Cfra_6671T1		0	1.37275e+07	46.44	8.73898e-05	3	1306.72	-0.744365	62.7201	0
Medium	VASNLLPK	1	0	0			0	1.36312e+07	17.78	0.0194606	2	841.514	-0.233687	41.0451	0
Medium	MAPSRSIGAmSmEKFASTISmSmHELGSMLFLR	1	1	1	Cfra_7151T1	M10(Oxidation); M12(Oxidation); M21(Oxidation); M23(Oxidation)	0	1.36297e+07	23.98	0.00639912	4	3698.7	-6.15357	39.8863	2
High	cQSVGAEVITDLSSGR	2	1	1	Cfra_4568T1	C1(Carbamidomethyl)	0	1.35603e+07	55.31	1.07471e-05	2	1678.81	1.67885	87.968	0
High	SLIGQHR	1	1	1	Cfra_3806T1		0	1.35186e+07	26.46	0.0036151	2	810.458	0.0310274	26.4209	0
Medium	LATQPLK	1	0	0			0	1.34072e+07	16.64	0.0253021	2	770.477	0.392297	38.6254	0
Medium	GIWHQVFAmDNSGSTSSQTYTEK	2	1	1	Cfra_6432T1	M9(Oxidation)	0	1.32721e+07	20.73	0.0101433	3	2590.15	0.273934	71.0257	0
High	AHQVVEDGYEFFAK	2	1	1	Cfra_8402T1		0	1.32315e+07	47.28	4.95731e-05	2	1639.77	-0.277781	74.7932	0
Medium	VEGVYAIGDVIDGPMLAHK	1	1	1	Cfra_7788T1		0	1.30998e+07	19.24	0.0488409	3	1984.02	-0.073182	97.5967	0
Medium	VPDSILGYK	1	1	1	Cfra_7455T1		0	1.30939e+07	19.8	0.0507857	2	991.547	0.835254	65.4593	0
High	YTLAASGQIYDIDGSSLDATK	3	1	1	Cfra_4775T1		0	1.30381e+07	104.11	1.61082e-10	2	2189.06	0.747488	85.3874	0
Medium	QGIELVLK	1	0	0			0	1.30077e+07	15.17	0.0592973	2	899.556	0.120773	64.0448	0
High	MNALLSEITNVEQTSEGQLVLHNK	1	1	1	Cfra_6296T1		0	1.2965e+07	34.68	0.00151482	3	2668.36	0.895022	111.362	0
Medium	IITHPNFNGNTLDNDIMLIK	2	1	1	CON_Trypsin		0	1.28722e+07	24.37	0.0166346	3	2283.18	0.743985	94.1393	0
High	VDSYWFSLFAK	1	1	1	Cfra_8100T1		0	1.28456e+07	46.56	6.07201e-05	2	1362.67	-0.00890804	115.435	0
High	NPNYAIK	1	1	1	Cfra_8133T1		0	1.26255e+07	34.57	0.00167587	2	819.436	0.532843	33.987	0
High	EVLEYEDTWQYLQDFADK	2	1	1	Cfra_3807T1		0	1.2583e+07	66.82	4.99127e-07	2	2292.04	0.900183	116.923	0
High	NTAFYPTTSLHSGGGAVYLDFIEGDVK	1	1	1	Cfra_3500T1		0	1.23823e+07	44.45	0.000138185	3	2859.39	2.20903	105.08	0
High	GGGTAQVLSAWYHER	1	1	1	Cfra_7455T1		0	1.23622e+07	37.87	0.000530742	3	1631.79	-0.0163494	77.8856	0
High	WYEGGYQcSSQEYIDVEK	1	1	1	Cfra_7087T1	C8(Carbamidomethyl)	0	1.23256e+07	83.14	5.66443e-09	2	2240.95	1.5226	75.7077	0
High	WVMDYTSFPVQTFK	1	1	1	Cfra_7076T1		0	1.23062e+07	53	1.55368e-05	2	1748.84	1.56618	104.132	0
High	VLDELTLTK	1	2	1	CON_00009865.2		0	1.21642e+07	61.51	2.26022e-06	2	1031.6	-0.62762	66.5198	0
High	IPFMVSLNVPNPNGNSDYHYcGGSLINK	2	1	1	Cfra_1701T1	C21(Carbamidomethyl)	0	1.1992e+07	31.14	0.00288424	3	3107.48	1.43524	99.3603	0
Medium	KALLQK	1	1	1	Cfra_3449T1		0	1.18423e+07	21.03	0.0149883	2	700.473	1.28405	14.1615	1
High	NKLNDLEDALQQAK	3	1	1	CON_00220327.3		0	1.17571e+07	71.64	2.9476e-07	2	1599.84	0.785854	79.1809	1
High	INMPMITVSEWANTQYQYIK	2	1	1	Cfra_6911T1		0	11653737	54.53	1.26854e-05	2	2430.19	1.24501	115.867	0
Medium	IVGGVAVTERIPFMVSLNDPR	1	1	1	Cfra_6582T1		0	1.16492e+07	26.13	0.00841045	3	2270.23	-0.0454589	101.309	1
High	ATYTEGQTIEVEWETTIAHDGGFFEIR	3	1	1	Cfra_5013T1		0	1.16244e+07	41.58	0.000187657	3	3100.44	-5.22838	122.547	0
High	LDIIMSVYK	1	1	1	Cfra_2646T1		0	1.16226e+07	57.5	3.91221e-06	2	1081.6	-0.114983	86.3147	0
High	ISVTEGSVIVR	1	1	1	Cfra_6968T1		0	1.15463e+07	38.95	0.000534871	2	1159.67	0.182172	61.2616	0
Medium	IVDEDFK	1	1	1	Cfra_4775T1		0	1.15404e+07	21.22	0.0173671	2	865.43	-0.702855	41.9055	0
Medium	LAADDFR	1	36	4	CON_00009865.2;CON_00217963.3;CON_00384444.5;CON_00721270.3		0	1.14834e+07	29.16	0.00764435	2	807.399	-0.387348	45.2017	0
Medium	DGITFR	1	1	1	Cfra_4775T1		0	1.14795e+07	23.69	0.0177439	2	708.367	-0.101728	48.0851	0
High	GPVGPSGPPGK	1	1	1	CON_00731432.2		0	11460679	39.93	0.000462393	2	949.51	-0.494056	31.5967	0
Medium	LDESLK	1	1	1	Cfra_7272T1		0	1.13347e+07	23.56	0.0233494	2	704.383	0.726741	29.7334	0
High	VTMQNLNDR	1	13	4	CON_00009865.2;CON_00217963.3;CON_00384444.5;CON_00721270.3		0	1.12656e+07	47.62	8.13014e-05	2	1090.53	0.0294885	40.9151	0
High	KWGFNDcSER	1	2	1	Cfra_6968T1	C7(Carbamidomethyl)	0	1.11809e+07	34.91	0.000376839	3	1298.56	0.365937	45.553	1
High	SNLcTYTLGK	1	1	1	Cfra_3159T1	C4(Carbamidomethyl)	0	1.11438e+07	39.41	0.000355109	2	1156.57	-0.0149673	54.5568	0
Medium	LSATQFQcILK	1	1	1	Cfra_3564T1	C8(Carbamidomethyl)	0	1.1073e+07	27.71	0.00559131	2	1308.7	0.156252	83.5229	0
High	DSVVVGSVSLGDWFIR	1	1	1	Cfra_4775T1		0	1.10388e+07	56.61	9.82228e-06	2	1735.9	0.893138	117.249	0
High	VVNDNDVVTTQPSQIFGYR	3	2	1	Cfra_8260T1		0	1.10075e+07	68.65	7.0276e-07	2	2152.07	0.653173	83.7368	0
High	VSSFIGWmDDTmANN	1	1	1	Cfra_6234T1	M8(Oxidation); M12(Oxidation)	0	1.09978e+07	17.17	0.0223952	2	1719.7	0.514857	85.0958	0
High	IPTALLTLESAK	1	1	1	Cfra_6822T1		0	1.0924e+07	57.79	3.99219e-06	2	1256.75	0.33122	87.5715	0
High	VIDVDVKPVGPGQVVVK	1	1	1	Cfra_1587T1		0	1.08565e+07	40.14	0.00011302	3	1748.03	-1.59407	69.6397	0
High	EAEYVIDESFYIAGLIK	2	1	1	Cfra_6846T1		0	1.08026e+07	74.02	1.52567e-07	2	1960	0.301923	122.576	0
High	IVLAAGVK	1	1	1	Cfra_8100T1		0	1.0801e+07	28.36	0.00226116	2	770.514	0.0455129	47.1295	0
Medium	SLTVNVPAGATANIIQR	1	1	1	Cfra_6866T1		0	1.07966e+07	24.65	0.00736951	2	1724.97	-0.106518	78.3481	0
Medium	YTAPAPK	1	1	1	Cfra_6671T1		0	1.06628e+07	20.1	0.0351805	2	747.405	2.39598	28.2739	0
Medium	ILAPVcTTTGVTFPNK	1	1	1	Cfra_3042T1	C6(Carbamidomethyl)	0	1.06429e+07	27.91	0.00671503	2	1718.92	1.03794	76.616	0
Medium	GcPESLRR	2	1	1	Cfra_4708T1	C2(Carbamidomethyl)	0	1.06276e+07	25.72	0.00683188	2	974.483	-0.4858	24.9945	1
High	LLESVNIVVPMHFGTFPK	1	1	1	Cfra_6386T1		0	1.05309e+07	54.31	1.20471e-05	3	2028.1	0.665898	104.625	0
High	GFGTLYGVGK	1	1	1	Cfra_6671T1		0	1.05081e+07	40.6	0.000165483	2	998.53	-0.891927	66.4046	0
High	EWISPASAmFAIDQLVLK	5	1	1	Cfra_7050T1	M9(Oxidation)	0	1.04654e+07	63.04	2.38364e-06	2	2035.06	2.07292	126.449	0
High	GIVYDTGGLSIK	1	1	1	Cfra_6671T1		0	1.04154e+07	38.11	0.00039404	2	1222.67	-0.0483303	73.0169	0
High	AVGLTEVMPFLLEDK	1	1	1	Cfra_7357T1		0	1.03335e+07	82.59	2.56126e-08	2	1661.88	1.41625	117.67	0
Medium	EMTWDVVPR	1	1	1	Cfra_8556T1		0	1.03323e+07	23.7	0.00959804	2	1132.55	-0.144405	79.2495	0
High	mLQDSLK	1	1	1	Cfra_4568T1	M1(Oxidation)	0	1.02533e+07	36.38	0.000863041	2	850.433	-0.550374	35.8394	0
High	YWPSLLITVDDVEAK	2	1	1	Cfra_3489T1		0	1.02492e+07	47.19	9.35828e-05	2	1748.91	2.42506	113.484	0
High	VDFTGEFIGNHAQGR	1	1	1	Cfra_3500T1		0	1.02334e+07	35.55	0.00101693	3	1647.79	-0.976772	70.9034	0
Medium	QDMQKAK	1	1	1	Cfra_5297T1		0	1.02111e+07	23.88	0.0124825	2	848.429	-0.167854	31.2462	1
High	EIFLQQPILLELQAPIK	2	1	1	Cfra_8402T1		0	1.0119e+07	41.24	8.77316e-05	2	1993.17	0.0331845	120.462	0
High	SNcASRPDALTSLLVK	1	1	1	Cfra_6671T1	C3(Carbamidomethyl)	0	1.01044e+07	36.26	0.0013604	3	1731.9	-1.10311	78.3032	0
Medium	GDWEEQAK	1	1	1	Cfra_4775T1		0	1.00802e+07	13.8	0.0486582	2	962.422	0.87021	34.3531	0
High	VINDNDPIPSLPTEAmGYK	1	1	1	Cfra_2685T1	M16(Oxidation)	0	1.00316e+07	33.36	0.00198367	2	2090.02	2.28249	80.4908	0
High	EVIDSDLFcQQEIWYK	2	1	1	Cfra_8556T1	C9(Carbamidomethyl)	0	9.99912e+06	64.76	1.05271e-06	2	2072.96	0.344254	102.542	0
High	VYTVSTSTDFYPASGAMDDWLYDHVASVAKDEK	2	1	1	Cfra_7050T1		0	9.98787e+06	35.9	0.000565487	3	3668.68	1.34512	109.463	1
High	ILTTPLVLHTVFLTGANIPTQIR	1	1	1	Cfra_7615T1		0	9.96166e+06	26.23	0.00278071	3	2518.48	1.0015	114.036	0
Medium	GYIANVDcR	1	1	1	Cfra_4775T1	C8(Carbamidomethyl)	0	9945361	22.31	0.00939983	2	1067.49	-2.01265	44.0866	0
Medium	DSSVPADNADLWYVGFGPTTLGGDDQPENLMAVSVQPLK	1	2	1	Cfra_3417T1		0	9.92058e+06	28.11	0.00479029	4	4103.96	1.61039	125.64	0
Medium	FAGSPEIYK	1	0	0			0	9.87436e+06	14.52	0.063573	2	1011.51	-0.700654	84.5278	0
High	IGVAIGDMVLDLSK	1	1	1	Cfra_1735T1		0	9.83053e+06	61.3	2.89111e-06	2	1430.79	-0.181329	110.582	0
High	GNLGILQTFDR	1	1	1	Cfra_6437T1		0	9.77132e+06	57.98	4.37857e-06	2	1233.66	0.74753	89.4766	0
Medium	SAQVIPR	1	1	1	Cfra_7076T1		0	9.66472e+06	23.61	0.00871024	2	770.451	-0.712207	33.7112	0
Medium	HLIYQQQK	1	1	1	Cfra_3061T1		0	9.66197e+06	18.99	0.0359621	2	1057.58	-1.63134	30.6214	0
Medium	KFGAVFLVNPR	1	1	1	Cfra_3564T1		0	9.65773e+06	22.59	0.0121178	3	1247.73	-0.45269	75.2623	1
Medium	NIFSSVR	1	2	1	Cfra_8260T1		0	9.65191e+06	19.45	0.0363203	2	822.447	-0.341053	58.4551	0
High	DVLTFAGHSR	2	2	1	Cfra_2200T1		0	9.58352e+06	34.04	0.00118337	2	1102.56	-0.349248	53.0256	0
Medium	GEGGPQGPR	1	1	1	CON_00707857.2		0	9.5618e+06	23.01	0.00800055	2	854.411	-0.374356	14.6398	0
High	SRSEDSYVTDSAAGAVAFAAGHR	3	1	1	Cfra_3806T1		0	9.45351e+06	50.55	2.20262e-05	3	2325.09	-0.178118	77.9411	1
High	DWVLTAAHcLDDVHNSFWNK	1	1	1	Cfra_7776T1	C9(Carbamidomethyl)	0	9.3623e+06	40.57	0.00018417	3	2428.11	-0.678082	106.329	0
Medium	TLLDIDNTR	1	1	1	CON_00019359.3		0	9.26941e+06	21.3	0.0381775	2	1060.56	-0.882335	62.9592	0
High	KPDTIPK	1	1	1	Cfra_5595T1		0	9.2176e+06	40.08	0.000114592	2	798.472	0.319739	19.1985	0
High	KSNAGLLNKR	1	1	1	Cfra_4119T1		0	9.18183e+06	33.8	0.00118808	3	1100.65	-0.733841	23.0665	2
High	FAPASSTSSEYLVGWTENDSAYK	2	1	1	Cfra_2380T1		0	9.16595e+06	36.34	0.000429706	2	2510.14	3.0799	91.3141	0
High	MLIASSK	1	1	1	Cfra_3337T1		0	9.14934e+06	36.69	0.000675011	2	749.423	0.0316519	35.6279	0
High	EAFSLFDKDGDGTITTK	1	1	1	Cfra_3276T1		0	9.14836e+06	41.16	0.000244991	2	1844.89	0.034539	77.7652	1
High	STQNcVVK	1	1	1	Cfra_1091T1	C5(Carbamidomethyl)	0	9.08153e+06	33.75	0.00141268	2	935.461	-0.25124	19.0305	0
High	IKYPENFFLLR	1	2	1	Cfra_8402T1		0	9.07474e+06	34.59	0.000903594	3	1439.8	-0.70065	94.2389	1
Medium	LSEVER	1	1	1	Cfra_6437T1		0	8.99441e+06	28.94	0.00702041	2	732.389	0.885493	25.3311	0
Medium	FYPMVSPVGHK	1	1	1	Cfra_2646T1		0	8.97871e+06	18.17	0.0602001	3	1261.64	-0.778895	60.0212	0
High	NLAQWVAVNIVcGDIDHmGK	1	1	1	Cfra_2646T1	C12(Carbamidomethyl); M18(Oxidation)	0	8.93721e+06	47.01	5.77295e-05	3	2256.09	0.713028	112.51	0
High	FVSLWLNPDTGK	1	1	1	Cfra_3489T1		0	8.92659e+06	38.79	0.00060119	2	1376.72	-0.0497602	94.0641	0
High	YMYWTMK	1	1	1	Cfra_1735T1		0	8.89231e+06	29.3	0.00137137	2	1022.45	-0.851387	77.7755	0
Medium	GGGIAmLLASWYHQQGSFNTIK	1	1	1	Cfra_2200T1	M6(Oxidation)	0	8.89112e+06	29.98	0.00401846	3	2395.19	2.32274	115.189	0
Medium	YQFDLSKPVGSR	1	1	1	Cfra_2752T1		0	8.88765e+06	20.91	0.0255453	3	1396.72	-0.00200609	61.8685	0
Medium	LNDLEDALQQAK	1	1	1	CON_00220327.3		0	8.83154e+06	19.07	0.0414997	2	1357.7	-0.0021507	74.2146	0
High	KFDSPLTLSEVSAADYDAVFYPGGHGPVWDLVTDK	1	1	1	Cfra_7357T1		0	8.82249e+06	37.92	0.000492379	4	3796.83	-1.41035	119.142	1
Medium	DLLWLDGTSYWWNTHQR	1	1	1	Cfra_0288T1		0	8.65687e+06	26.41	0.00559972	3	2191.04	0.411621	115.618	0
High	KILAQIDDILAK	2	1	1	Cfra_8536T1		0	8.56433e+06	59.94	1.18347e-06	2	1340.81	0.0116606	85.2759	1
High	DAEAWFNEK	1	6	1	CON_00009865.2		0	8.52368e+06	30.46	0.00188894	2	1109.49	0.590194	69.6354	0
Medium	ADLEMQIESLTEELAYLKK	1	1	1	CON_00009865.2		0	8.41733e+06	25.87	0.0119058	3	2224.14	0.323694	123.031	1
Medium	KWAEER	1	1	1	Cfra_7641T1		0	8.39914e+06	22.95	0.0190122	2	818.415	-0.144704	53.5214	1
High	VSSYIDWIEK	1	2	1	Cfra_7776T1		0	8.37623e+06	35.73	0.000908822	2	1239.63	0.324986	87.6886	0
Medium	VVLHPEYNNDFLFNDIAMIR	1	1	1	Cfra_6379T1		0	8.3455e+06	26.8	0.00835718	3	2420.21	-0.180681	110.962	0
Medium	GKDNALMPNWLHLPVGYHGR	1	1	1	Cfra_1735T1		0	8.26426e+06	27.65	0.00867544	4	2275.15	-0.637289	89.4811	1
Medium	LQDSIK	1	1	1	Cfra_2768T1		0	8.25743e+06	25.89	0.0213835	2	703.398	-0.297565	29.9777	0
High	YVMFENPDEDcMDR	1	1	1	Cfra_2646T1	C11(Carbamidomethyl)	0	8.25635e+06	48.83	1.52811e-05	2	1820.7	1.55699	75.7692	0
Medium	VGGDSLGLYLFDQQLHKKD	2	1	1	Cfra_4547T1		0	8.23826e+06	27.78	0.00983676	4	2133.09	-1.50028	90.5165	2
High	VGSITNIR	1	1	1	Cfra_1091T1		0	8.17369e+06	36.59	0.00130472	2	859.499	-0.438812	42.4419	0
Medium	GVFLGYR	1	2	1	Cfra_7186T1		0	8.14154e+06	24.2	0.00893445	2	811.446	-0.273444	61.8541	0
Medium	LAANEVDIVEADMVTLEPK	2	1	1	Cfra_4754T1		0	8.12935e+06	26.64	0.00802051	2	2057.05	-0.619949	109.895	0
Medium	NQILAVK	1	2	1	Cfra_2539T1		0	7.98187e+06	22.93	0.00993195	2	785.488	0.261593	60.2262	0
Medium	LmYLTIGMTTLK	1	2	1	Cfra_3417T1	M2(Oxidation)	0	7.96193e+06	19.98	0.03918	2	1400.75	0.797819	92.8434	0
High	KVNIVK	1	1	1	Cfra_8133T1		0	7.94969e+06	26.88	0.00389721	2	700.472	0.935515	12.8103	1
High	IFMGFIGSEPEScGVcQYGK	1	1	1	Cfra_6432T1	C13(Carbamidomethyl); C16(Carbamidomethyl)	0	7.9395e+06	40.56	0.000102602	2	2266	-0.744905	95.0309	0
High	WTLLQEQGTK	1	5	1	CON_00293665.7		0	7.91345e+06	38.38	0.000849485	2	1203.64	-0.180305	68.1966	0
High	IDIAGTFEK	1	1	1	Cfra_3500T1		0	7.87805e+06	39.14	0.000402267	2	993.524	-0.85726	66.4004	0
Medium	NTVADPGKEYYGGGGAVWIHEVPTGNSVTIEK	1	1	1	Cfra_8133T1		0	7.80537e+06	24.4	0.0154308	3	3345.64	-0.031775	81.694	1
Medium	VDDWQTHVVVDANLITGQNPGSSER	1	1	1	Cfra_7357T1		0	7.74328e+06	21.75	0.029073	3	2737.32	0.687874	88.2081	0
High	FGGAMVSHPLLEDR	1	1	1	Cfra_3564T1		0	7.73074e+06	36.57	0.000682907	3	1528.76	-1.24172	65.7566	0
High	TAAVQGSGWGWLGYDK	1	1	1	Cfra_6174T1		0	7.70998e+06	92.29	1.7706e-09	2	1695.81	1.03629	92.2916	0
High	ASTIEGEYYPALTSDEWSK	1	1	1	Cfra_1829T1		0	7.70631e+06	42.23	0.000107714	2	2146.98	0.86388	88.3467	0
High	GYLAFNDEYEPNLNPSSLALFDK	2	1	1	Cfra_7076T1		0	7.67585e+06	31.36	0.00277833	2	2617.25	0.421233	113.84	0
Medium	NPDDSVAWHSEIMSISTAMK	1	1	1	Cfra_7262T1		0	7.63774e+06	14.67	0.047767	3	2219.01	-0.579386	96.2773	0
High	VASMVTEEQEEAIIVR	3	1	1	Cfra_3061T1		0	7.6249e+06	75.19	1.42265e-07	2	1803.92	1.16578	77.5564	0
High	ILGDLLEEcASYK	1	1	1	Cfra_5595T1	C9(Carbamidomethyl)	0	7.59603e+06	71.38	2.83834e-07	2	1510.75	1.4954	86.8732	0
High	DITYSGFDVQPVcTIAER	2	1	1	Cfra_3564T1	C13(Carbamidomethyl)	0	7.59354e+06	43.47	0.000132685	2	2070.98	0.287395	91.8828	0
High	TSTAGSTSSYIAQAWVLK	1	1	1	Cfra_4754T1		0	7.50906e+06	80.01	2.79356e-08	2	1870.96	0.747701	93.4689	0
High	MISWGSPR	2	2	1	Cfra_2200T1		0	7.48946e+06	35.14	0.00084204	2	933.461	0.214267	61.2806	0
High	VSEIVIHPGYSVDDQYATNDIAmIR	1	1	1	Cfra_3417T1	M23(Oxidation)	0	7.46722e+06	36.9	0.00109233	3	2822.37	2.32315	84.712	0
Medium	KcVVADTR	1	1	1	Cfra_4119T1	C2(Carbamidomethyl)	0	7.45939e+06	19.28	0.0483931	2	948.493	-0.154713	21.192	1
High	FASFIDK	1	39	1	CON_00293665.7		0	7.43762e+06	31.95	0.00245731	2	827.43	0.559703	59.916	0
High	TMSAAVLSDLQAGFLK	1	1	1	Cfra_4754T1		0	7.40358e+06	63.06	1.73009e-06	2	1651.87	0.531103	109.767	0
Medium	YGLPDEGcFAYK	1	1	1	Cfra_3666T1	C8(Carbamidomethyl)	0	7.34846e+06	14.78	0.038829	2	1419.63	0.824817	75.9539	0
High	FTGLAFDNFR	1	1	1	Cfra_3489T1		0	7.32362e+06	42.36	0.000145191	2	1187.58	-0.0363051	89.6687	0
Medium	TITLEVEPSDTIENVK	1	1	1	CON_00726431.1		0	7.29663e+06	24.34	0.0191427	2	1787.93	1.45304	79.5781	0
High	GLSTGWFSDYSDSEAK	2	1	1	Cfra_2200T1		0	7.28507e+06	50.79	9.73096e-06	2	1749.76	-0.139411	87.0136	0
High	LAANDIWNVVGDNSR	2	1	1	Cfra_7186T1		0	7.27321e+06	71.61	2.51938e-07	2	1643.82	1.90335	91.3246	0
High	TIDDLKNQILNLTTDNANILLQIDNAR	1	1	1	CON_00009865.2		0	7.1542e+06	44.4	7.62464e-05	3	3052.63	1.78744	127.612	1
High	AIGFEVR	1	1	1	Cfra_3693T1		0	7.15035e+06	30.75	0.00366007	2	791.441	-0.198079	51.8727	0
Medium	TDSEAATLLTSNIDAR	2	1	1	Cfra_1153T1		0	7.13162e+06	24.75	0.0110539	2	1677.83	-0.529674	77.8409	0
Medium	LSFMIHIDGK	1	1	1	Cfra_4512T1		0	7.12121e+06	22.44	0.031074	3	1160.61	-0.119321	82.2067	0
Medium	LTLSEGESWVYPTK	1	1	1	Cfra_1829T1		0	7.11468e+06	29.62	0.00485691	2	1609.81	0.586327	84.9254	0
High	MEYSSDELSDGEEFTSLEGSTLTVK	5	1	1	Cfra_3621T1		0	7.07004e+06	27.74	0.00196407	2	2754.22	1.80418	95.9158	0
High	NVLFVLTSNNK	1	1	1	Cfra_7357T1		0	7.04236e+06	71.38	2.25612e-07	2	1248.69	-0.653519	84.2176	0
High	NMQDMVEDYR	1	1	1	CON_00220327.3		0	7.02579e+06	18.35	0.0170669	2	1300.53	-0.188197	66.8009	0
Medium	NVANQGGAVHVQGIFGYFFVAGK	1	1	1	Cfra_3230T1		0	7.02451e+06	25.77	0.0154937	3	2380.22	1.55555	110.422	0
Medium	QYGLLIAPISSQLK	1	1	1	Cfra_0288T1		0	7.01929e+06	22.51	0.00897677	2	1530.89	0.175405	96.4349	0
High	GDIFFVPIK	1	2	1	Cfra_4548T1		0	6.96655e+06	52.75	1.51302e-05	2	1035.59	-0.306655	96.7113	0
High	NAEEDGDcNAAEELIK	1	1	1	Cfra_7262T1	C8(Carbamidomethyl)	0	6.95836e+06	54.4	4.23795e-06	2	1777.76	2.11113	64.4042	0
High	VPAASLQEELEALDALK	2	1	1	Cfra_2026T1		0	6.85546e+06	58.88	4.01201e-06	2	1796.97	0.700253	111.122	0
High	FNSNYGAILEAVNPTSQVIR	2	1	1	Cfra_3230T1		0	6.83916e+06	47.8	8.62985e-05	2	2193.13	0.885599	103.566	0
Medium	SFFTEEGQELAK	2	1	1	Cfra_5973T1		0	6.79047e+06	22.9	0.0105137	2	1385.66	-0.372954	76.0112	0
Medium	THILVDFcK	1	1	1	Cfra_4708T1	C8(Carbamidomethyl)	0	6.7792e+06	22.78	0.0255706	3	1132.58	-0.306507	60.2602	0
Medium	YWVPAKDDIVTSVLIDTQVSEHWR	1	1	1	Cfra_2646T1		0	6.74849e+06	24.98	0.0144548	4	2857.45	-0.33624	109.879	1
Medium	VSIEVIR	1	1	1	Cfra_6671T1		0	6.69417e+06	30.1	0.00522822	2	815.499	0.388266	57.7463	0
Medium	AENIPEAWNWcNVGGK	1	1	1	Cfra_3666T1	C11(Carbamidomethyl)	0	6.65466e+06	19.59	0.0192326	2	1844.84	0.668881	89.0697	0
High	NDEYWIAPTAQVIGNVTLK	2	1	1	Cfra_1231T1		0	6.63698e+06	44.26	0.000166863	2	2132.11	1.37934	105.438	0
Medium	IVIHPSFNAAYLK	1	1	1	Cfra_0574T1		0	6.57977e+06	23.52	0.0144505	3	1472.82	-1.45577	76.3264	0
High	EIDYENNNNEDEDLTDEIR	2	1	1	Cfra_2284T1		0	6.55494e+06	72.94	5.93138e-08	2	2339.98	0.820008	71.9998	0
Medium	IVEKNDDEFFGVK	1	1	1	Cfra_2646T1		0	6547124	27.37	0.00723764	3	1539.77	-0.961222	61.7782	1
Medium	MDDLAEQYHLR	1	1	1	Cfra_7076T1		0	6511696	23.7	0.0061854	3	1390.64	-0.438077	61.9935	0
High	DITVGFETNcYTNAK	1	1	1	Cfra_6432T1	C10(Carbamidomethyl)	0	6.4645e+06	33.23	0.000665469	2	1732.79	1.11577	74.0644	0
High	LLLIGDSGVGK	1	3	1	Cfra_8452T1		0	6.3837e+06	34.99	0.000871631	2	1071.64	-0.327322	75.5907	0
Medium	VGGDSLGLYLFDQQLHKK	1	1	1	Cfra_4547T1		0	6.34883e+06	24.87	0.0171064	4	2018.07	-0.994554	89.6996	1
Medium	DSTTGGASNSFVDFVWPK	1	2	1	Cfra_6968T1		0	6.34301e+06	20.4	0.0214323	2	1914.89	2.08651	106.707	0
High	DMTSANAFcPVYAK	1	1	1	Cfra_5389T1	C9(Carbamidomethyl)	0	6.3261e+06	36.47	0.000263121	2	1574.7	-0.958051	71.7701	0
High	KLmYLTIGMTTLK	3	2	1	Cfra_3417T1	M3(Oxidation)	0	6.30242e+06	39.56	0.000387318	2	1528.85	0.4919	83.1781	1
Medium	KNVYESAPWEFLMDSPTPIK	1	1	1	Cfra_3489T1		0	6.29614e+06	28.58	0.0056857	3	2352.16	1.41183	109.519	1
Medium	FSSGLGmFTYTK	1	1	1	Cfra_3564T1	M7(Oxidation)	0	6211193	19.78	0.0294549	2	1354.64	0.538407	73.3899	0
Medium	SFGGNGRGNGR	1	0	0			0	6.13499e+06	18.56	0.0348289	2	1078.51	-3.30258	83.2265	1
Medium	RFDLDNVATWMAVNIMcGDTDHNGK	1	1	1	Cfra_1091T1	C17(Carbamidomethyl)	0	6.08557e+06	21.02	0.0126509	4	2880.29	1.41676	121.228	1
Medium	VYcIHEIGFFLK	1	1	1	Cfra_6386T1	C3(Carbamidomethyl)	0	5.84197e+06	23.08	0.0211577	3	1525.79	-0.340165	95.2097	0
Medium	IcGDVHGQYFDLLR	1	1	1	Cfra_8402T1	C2(Carbamidomethyl)	0	5.84054e+06	20.49	0.032159	3	1692.82	-0.575095	83.3362	0
High	IWATcGTGVNVTSLVK	1	1	1	Cfra_6671T1	C5(Carbamidomethyl)	0	5.82626e+06	53.06	2.02667e-05	2	1705.89	0.410201	88.1565	0
Medium	YIITPRcLR	1	1	1	Cfra_5166T1	C7(Carbamidomethyl)	0	5.81448e+06	20.9	0.0227593	2	1191.67	5.3941	85.0117	1
High	NDTVTALTSGIEGLYK	1	1	1	Cfra_7788T1		0	5.81368e+06	57.21	8.74496e-06	2	1681.86	-0.184337	100.069	0
High	DTPELSDSDDDEANPPLTLLALGIGQVEIK	1	1	1	Cfra_6586T1		0	5.81367e+06	39.8	0.0005288	3	3165.57	0.927823	130.872	0
Medium	LSFYATR	1	1	1	Cfra_4649T1		0	5.77718e+06	26.33	0.00547101	2	857.452	-0.0182113	55.8319	0
High	SYDNYVTDSAAGAVAFAAGHR	2	1	1	Cfra_3807T1		0	5.76765e+06	65.05	6.25216e-07	2	2142.99	0.880147	91.2529	0
Medium	VDVDELEELAGEcGIQAMPTFQFYK	1	0	0		C13(Carbamidomethyl)	0	5.73633e+06	17.52	0.0592987	3	2889.33	-0.301552	123.414	0
Medium	ATAIEmR	1	1	1	Cfra_7049T1	M6(Oxidation)	0	5.69505e+06	27.76	0.0103009	2	807.403	0.195033	21.6247	0
Medium	VNIHATDGGFEWVSNIDTVYK	2	4	1	Cfra_0694T1		0	5.6678e+06	25.73	0.0100238	3	2365.15	1.48741	97.1534	0
High	NDFTAQIHNMVR	2	1	1	Cfra_7076T1		0	5.63447e+06	50.9	2.19464e-05	2	1445.7	0.260829	72.6405	0
High	KLDVIADAVFVNSLR	1	1	1	Cfra_3061T1		0	5.61198e+06	34.56	0.000787377	3	1659.94	-0.303827	99.4938	1
High	DAWPIMK	1	1	1	Cfra_6434T1		0	5562730	29.23	0.00376106	2	860.434	0.0453418	71.0619	0
Medium	SFPTAYVVLSGEYIGNR	1	1	1	Cfra_3230T1		0	5.52047e+06	27.04	0.00721594	2	1872.95	1.26128	102.568	0
High	ADTLTDEINFLR	1	3	1	CON_00293665.7		0	5.49196e+06	48.21	4.60574e-05	2	1407.71	0.413743	96.8921	0
High	DWVLTAAHcLDQVYNK	1	2	1	Cfra_3417T1	C9(Carbamidomethyl)	0	5.4122e+06	39.6	0.000328943	2	1932.93	0.299413	100.779	0
High	mAAYFDGLLSETSYPK	2	1	1	Cfra_4004T1	M1(Oxidation)	0	5.38902e+06	47.26	4.69829e-05	2	1808.84	1.10067	94.7438	0
High	FFTTLGALATAPGNTGIWIQQK	1	1	1	Cfra_2213T1		0	5.36395e+06	42.07	0.0002142	3	2335.25	0.287811	110.597	0
Medium	NELFFER	1	1	1	Cfra_7186T1		0	5.33848e+06	24.13	0.0108183	2	954.467	-0.572544	71.9911	0
High	TFGDAVADALK	1	1	1	Cfra_1153T1		0	5.33744e+06	36.11	0.000820436	2	1107.57	-0.632818	79.5832	0
Medium	TTEcWVTLYTVDTVR	1	1	1	Cfra_1091T1	C4(Carbamidomethyl)	0	5.28228e+06	21.98	0.0206008	2	1843.89	1.01401	97.2945	0
Medium	DTQNPEYASDDcKLPFNIK	1	1	1	Cfra_2646T1	C12(Carbamidomethyl)	0	5.25349e+06	14.53	0.0458082	3	2255.03	0.984719	77.5988	1
High	LYINFLR	1	2	1	Cfra_7262T1		0	5.23436e+06	49.54	1.29764e-05	2	938.546	-0.213564	92.206	0
Medium	ALIAMDKVEMVLPAK	1	1	1	Cfra_1735T1		0	5.23083e+06	19.62	0.0332889	3	1628.91	-0.548619	89.2685	1
Medium	DDALKPGK	1	1	1	Cfra_3061T1		0	5.22267e+06	22.05	0.00997976	2	843.456	-0.762105	13.7934	0
High	IGDYTDFYSSR	1	1	1	Cfra_1735T1		0	5.15985e+06	49.61	1.64093e-05	2	1323.59	0.592178	68.4057	0
High	SEDSYVTDSAAGAVAFAAGHR	2	1	1	Cfra_3806T1		0	5.13075e+06	53.6	1.06946e-05	2	2081.96	1.3182	84.3626	0
Medium	VAAELGGVALAGASWR	1	1	1	Cfra_2380T1		0	5.089e+06	18.26	0.0440374	2	1527.83	0.177572	88.6709	0
High	TPLTDISLGVAGVETDKK	1	1	1	Cfra_0852T1		0	5.0647e+06	31.16	0.00222023	3	1844	0.145171	82.8354	1
High	DDLFALLEcWEQEQPAEFASIHDDRK	1	1	1	Cfra_8556T1	C9(Carbamidomethyl)	0	5.02638e+06	44.09	8.77369e-05	3	3162.46	3.9459	124.765	1
High	GWGSFVDSK	1	1	1	Cfra_7788T1		0	5.00593e+06	28.93	0.00262273	2	982.463	-0.293397	67.1972	0
Medium	WEYVPLGPFLGK	1	2	1	Cfra_1735T1		0	4.96998e+06	23.52	0.020453	2	1405.75	-0.520206	109.524	0
High	MGQPITAcGNNLIAGTVK	1	1	1	Cfra_3377T1	C8(Carbamidomethyl)	0	4.95732e+06	38.79	0.000541731	2	1844.93	-0.781345	75.0303	0
High	MTLDDFR	1	1	1	CON_00019359.3		0	4.92788e+06	27.94	0.00353527	2	897.413	-0.171184	67.4506	0
High	FSDASTmSK	1	1	1	Cfra_7050T1	M7(Oxidation)	0	4.91488e+06	44.92	3.75972e-05	2	989.424	-0.43204	22.2271	0
High	mPAYNLDLVDITAEGFK	1	1	1	Cfra_8133T1	M1(Oxidation)	0	4.88481e+06	63.37	1.4268e-06	2	1912.94	0.328749	106.176	0
High	YAYLAVK	1	1	1	Cfra_4708T1		0	4879215	34.73	0.000392786	2	827.466	-0.00992544	53.1014	0
High	GSAMAAGFDLFSAHDGVIPAEGK	1	1	1	Cfra_6096T1		0	4.82271e+06	39.69	0.000316827	3	2248.07	-0.0105035	97.7362	0
Medium	TLIVGSTDYSVIIAK	1	1	1	Cfra_0839T1		0	4.78048e+06	16.79	0.037694	2	1579.9	0.618965	88.3953	0
High	TLLYGGIFAYPADK	1	1	1	Cfra_3061T1		0	4768169	35.29	0.000843034	2	1528.8	-0.750197	100.17	0
High	WDLDLR	1	1	1	Cfra_3806T1		0	4.76568e+06	41.17	0.000328449	2	817.42	-0.206406	79.5689	0
High	TITTFNTGMFNTVSNYDER	1	1	1	Cfra_8556T1		0	4.73279e+06	69.93	2.33737e-07	2	2211.01	2.27069	92.3508	0
High	TGAYVGSR	1	1	1	Cfra_8133T1		0	4.67532e+06	34.49	0.000622355	2	810.41	-0.179392	23.9362	0
High	VVLHPEYNNDYLFNDIAMIR	1	1	1	Cfra_6380T1		0	4.63972e+06	38.4	0.000729947	3	2436.2	0.31051	105.385	0
Medium	TAEPTATYDDFLEELPSDDcR	1	1	1	Cfra_3337T1	C20(Carbamidomethyl)	0	4.56425e+06	19.21	0.0140009	2	2445.04	1.75529	98.8902	0
High	ETcHGDFSTTLADLAAESDmLSTLVTAVK	2	1	1	Cfra_3621T1	C3(Carbamidomethyl); M20(Oxidation)	0	4.54604e+06	39.9	0.000286522	3	3099.47	5.74427	129.23	0
Medium	DHSFILGATNPSVGTLNEEVNAMK	1	1	1	Cfra_1153T1		0	4.53075e+06	19.41	0.0378019	3	2544.24	0.944665	95.0412	0
High	TGSVPVEAFEFLTR	1	1	1	Cfra_6016T1		0	4.49583e+06	33.17	0.00178321	2	1552.8	1.05126	109.83	0
Medium	ALVIFDK	1	0	0			0	4.4548e+06	14.07	0.0587613	2	805.482	-0.305803	76.9451	0
Medium	AGIESDDVISIAYLSVGTVHK	1	1	1	Cfra_4128T1		0	4.44251e+06	22.03	0.0338371	3	2174.13	-0.0676361	102.384	0
High	YILDFTDSLK	1	1	1	Cfra_7648T1		0	4.43896e+06	44.75	0.000108864	2	1214.63	0.642017	95.6077	0
High	NTSWTFGALDPVQVVQMAK	1	1	1	Cfra_1153T1		0	4.41014e+06	62.34	2.77136e-06	2	2092.05	0.690134	113.398	0
High	GILDLSIDSLTGSAK	1	1	1	Cfra_0155T1		0	4.33197e+06	73.81	1.58046e-07	2	1489.81	0.292383	105.111	0
Medium	RLSSQMR	1	1	1	Cfra_3564T1		0	4.3061e+06	17.2	0.0685966	2	877.467	0.0472439	19.4458	1
Medium	KLSNLGPASGLAEASVLDALLTR	1	1	1	Cfra_6434T1		0	4.28549e+06	18.01	0.0221375	3	2296.29	0.794463	117.363	1
High	VcNYVNWIQQTIAAN	1	1	1	CON_Trypsin	C2(Carbamidomethyl)	0	4.27248e+06	38.06	0.000437681	2	1793.87	4.39745	116.96	0
Medium	LALDIEIATYR	2	9	1	CON_00220327.3		0	4.25681e+06	19.92	0.0341228	2	1277.71	0.0777223	94.2034	0
Medium	NLLSVAYK	1	6	1	CON_00703110.1		0	4.25298e+06	26.33	0.00570382	2	907.525	0.0623368	65.583	0
High	VPFMVSLNDPK	1	1	1	Cfra_6380T1		0	4.24084e+06	31.78	0.00272135	2	1246.65	-0.407146	82.5589	0
Medium	LTPLGDQEmASLLALK	1	1	1	Cfra_4119T1	M9(Oxidation)	0	4.21145e+06	26.35	0.00776327	2	1715.93	1.46828	90.4158	0
High	GVLDFVEPGVLVGDDVTK	1	1	1	Cfra_5288T1		0	4.19522e+06	58.19	5.99235e-06	2	1858.98	1.38038	108.922	0
High	VAGMIYDIDGFTLLHAEQYR	1	1	1	Cfra_3489T1		0	4.18853e+06	39.98	0.000366685	3	2312.14	0.564894	108.359	0
High	VNMKEDEAVGSAYK	1	1	1	Cfra_6627T1		0	4.18274e+06	34.44	0.00102529	2	1540.73	-1.27579	42.2365	1
Medium	FTEPITMPAVVDFSAGLK	1	1	1	Cfra_2646T1		0	4.15582e+06	18.63	0.0541498	2	1922.99	0.514299	111.518	0
High	VIAYLAPVYLLGK	1	1	1	Cfra_4649T1		0	4.10781e+06	44.22	4.41729e-05	2	1419.86	0.0565429	111.268	0
High	GFEGLVLGAR	1	1	1	Cfra_0684T1		0	4031244	50.84	3.79104e-05	2	1018.57	-0.0299805	81.8618	0
Medium	TTGQLcVPFSDTSLmK	1	1	1	Cfra_3721T1	C6(Carbamidomethyl); M15(Oxidation)	0	4.02478e+06	26.85	0.00454384	2	1800.85	1.03082	80.6147	0
High	DAETWFLSK	1	1	1	CON_00217963.3		0	4.0138e+06	40.52	0.000221789	2	1096.53	-0.0637576	87.118	0
Medium	NQILNLTTDNANILLQIDNAR	1	1	1	CON_00009865.2		0	4.00416e+06	20.54	0.0322324	3	2367.26	0.83739	110.248	0
High	IMRPTDVPDTGLLcDLLWSDPDSDITGWGENDR	1	1	1	Cfra_8402T1	C14(Carbamidomethyl)	0	3.97312e+06	35.63	0.000588083	3	3759.73	-0.242599	124.461	0
High	KGESLLGAYDTWR	1	1	1	Cfra_1166T1		0	3.92298e+06	31.67	0.00282519	3	1495.75	-1.28494	80.4861	1
Medium	FAFTTVVPGEHFVcLTTDAGWVGTGAAIK	1	1	1	Cfra_4890T1	C14(Carbamidomethyl)	0	3.88363e+06	26.21	0.0112486	3	3052.53	1.11401	111.197	0
High	AEYLQAANVEMmAPGK	1	1	1	Cfra_6846T1	M12(Oxidation)	0	3.86108e+06	32.07	0.00176948	2	1738.82	2.20283	68.1185	0
Medium	FAYPENPFAK	1	1	1	Cfra_5595T1		0	3.8114e+06	19	0.0314731	2	1183.58	-0.0918412	80.9021	0
Medium	QEQWMITAWGTSGQVLK	1	1	1	Cfra_4775T1		0	3.755e+06	21.68	0.028187	2	1962.98	1.42492	102.08	0
Medium	TIWELAENTIVSHEGFEAR	1	1	1	Cfra_3564T1		0	3.73414e+06	23.02	0.0239465	3	2202.09	1.1107	109.43	0
High	DAEEWFFTK	1	2	1	CON_00384444.5		0	3.6601e+06	60.12	1.13542e-06	2	1172.53	0.524983	92.5933	0
Medium	NNADSSDGMLGAcGYYYNSVLNK	1	1	1	Cfra_6437T1	C13(Carbamidomethyl)	0	3.60966e+06	17.7	0.0198224	2	2513.07	-0.970259	87.7577	0
Medium	GIFLGQR	2	3	1	Cfra_7076T1		0	3.54561e+06	29.7	0.00450038	2	790.457	-0.184143	59.6857	0
Medium	MKHSRI	1	1	1	Cfra_4568T1		0	3.54352e+06	13.8	0.0562774	2	771.424	-6.50259	71.8263	2
High	EITGLQDLFDmSK	1	1	1	Cfra_4129T1	M11(Oxidation)	0	3.51832e+06	60.39	2.37669e-06	2	1512.73	0.664706	97.9565	0
Medium	SLHTLFGDELcK	1	2	1	CON_00708398.1	C11(Carbamidomethyl)	0	3.49521e+06	25.22	0.0121746	3	1419.69	-0.756639	76.2059	0
Medium	IQYLAASDGQWGEHEIDYILFAQR	1	1	1	Cfra_6016T1		0	3.45071e+06	27.02	0.0063555	3	2823.38	0.68508	115.324	0
Medium	AGVEIAYNWQK	1	0	0			0	3.44192e+06	18.55	0.0495711	2	1278.65	0.470597	71.6905	0
High	YGINSDGFFDLEDLPK	1	1	1	Cfra_0852T1		0	3.42803e+06	51.87	1.88538e-05	2	1829.86	1.40049	110.482	0
High	MDLIDLDDDK	1	1	1	Cfra_8438T1		0	3.35995e+06	43.66	5.02523e-05	2	1192.54	0.0498951	80.5674	0
High	AFWWEGK	1	1	1	Cfra_1829T1		0	3329797	37.26	0.000535605	2	923.44	-0.698528	86.6654	0
High	ADILLVAVGR	1	1	1	Cfra_7788T1		0	3.31721e+06	55.3	3.44474e-06	2	1026.63	2.01311	86.7683	0
Medium	GPIVcSIATGEALDYGYR	1	1	1	Cfra_3666T1	C5(Carbamidomethyl)	0	3.26398e+06	27.1	0.00789687	2	1941.95	5.01966	88.732	0
High	VSSYINWITATMK	1	2	1	Cfra_3417T1		0	3.21945e+06	58.35	4.53275e-06	2	1513.77	0.832131	105.907	0
Medium	IFIWK	1	1	1	Cfra_2026T1		0	3.17401e+06	14.65	0.053129	2	706.429	0.0951777	80.3351	0
High	LNVEFAQYVLFPSVK	1	1	1	Cfra_1829T1		0	3.16764e+06	29.28	0.00300982	2	1753.95	1.06612	114.377	0
Medium	YYGYLWSEVYSADmFATR	1	1	1	Cfra_4119T1	M14(Oxidation)	0	3.08812e+06	14.04	0.0460422	2	2237.98	-0.316285	113.008	0
Medium	DFQTQLNIENSEWDIR	1	1	1	Cfra_1829T1		0	3.08187e+06	20.13	0.0242627	2	2007.94	1.32756	97.9611	0
High	NQQLLQEIESLEDR	1	1	1	Cfra_6331T1		0	3.07193e+06	84.25	1.40939e-08	2	1714.86	0.897399	103.851	0
High	SLPLSLEFIR	1	1	1	Cfra_5812T1		0	2.99753e+06	28.2	0.00325416	2	1174.68	-0.77876	102.149	0
High	FGLDFAVGAR	1	1	1	Cfra_3564T1		0	2.99335e+06	63.7	1.15176e-06	2	1052.55	-0.701114	88.6302	0
High	TNWNIAALLAK	1	1	1	Cfra_7251T1		0	2.98626e+06	70.2	3.91547e-07	2	1214.69	-0.0879132	103.562	0
High	GEVQVVTLMQFTPLK	1	1	1	Cfra_6822T1		0	2.98389e+06	46.11	6.24511e-05	2	1689.93	0.935952	110.14	0
High	NAMDSLVEFLGREPNAEAFLISK	1	1	1	Cfra_4119T1		0	2.93927e+06	46.37	9.80368e-05	3	2551.29	1.45411	124.705	1
Medium	LAQDIVEDISGPLVVIcVLK	1	1	1	Cfra_5812T1	C17(Carbamidomethyl)	0	2.93607e+06	14.75	0.058619	3	2181.22	0.0979709	128.138	0
High	NTSESDPDIVQSFVDYLR	1	1	1	Cfra_4129T1		0	2.91324e+06	48.42	4.02864e-05	2	2084.98	1.36537	118.743	0
High	MSIVWDR	1	1	1	Cfra_1166T1		0	2.88269e+06	39.83	0.000327575	2	906.45	-0.0765888	69.4632	0
High	TVMENFVAFVDK	1	2	1	CON_00708398.1		0	2.84688e+06	54.41	1.24974e-05	2	1399.69	0.59852	104.62	0
Medium	TVINIDGcVAPDKDLTQIK	1	1	1	Cfra_4775T1	C8(Carbamidomethyl)	0	2.83e+06	18.6	0.0559056	2	2100.1	-0.465848	77.1494	1
High	SALTVQFVQGIFVEK	1	2	1	Cfra_1194T1		0	2.82756e+06	32.27	0.00154161	2	1665.93	2.53869	108.727	0
Medium	mNNLGIDFSQNLNEVNTK	1	1	1	Cfra_4119T1	M1(Oxidation)	0	2.80119e+06	20.31	0.0311921	2	2066.98	1.18718	82.894	0
High	WNVLAGIK	1	1	1	Cfra_1153T1		0	2.79405e+06	38.93	0.000473371	2	900.53	-0.691466	83.8667	0
Medium	NAmDSLVEFLGR	1	1	1	Cfra_4119T1	M3(Oxidation)	0	2.78391e+06	19.88	0.0354666	2	1367.66	0.495178	95.54	0
High	GIVGVVLFNHAK	1	1	1	Cfra_6096T1		0	2.77685e+06	47.32	2.16349e-05	2	1253.74	-0.416186	79.2923	0
High	TWDVITVDK	1	1	1	Cfra_6822T1		0	2.7484e+06	40.92	0.000319593	2	1076.56	-0.67833	72.9901	0
High	SQFEMVPLWVGSAR	1	1	1	Cfra_6822T1		0	2.74188e+06	40.52	0.000385913	2	1606.81	0.546607	104.173	0
Medium	mDYFGPMVNR	1	0	0		M1(Oxidation)	0	2.72757e+06	14.61	0.040379	3	1245.53	-6.56533	87.35	0
Medium	ELNSANIYHGIISSVEEYGTAGVFIMPR	1	1	1	Cfra_7186T1		0	2.69797e+06	22.89	0.0246741	4	3067.52	0.066088	127.051	0
High	TDLEMQIEGLKEELAYLR	1	1	1	CON_00217963.3		0	2.69181e+06	41.29	0.000367794	3	2151.1	0.772424	118.913	1
High	TQIGNLDKVESFVK	1	1	1	Cfra_2549T1		0	2.64565e+06	43.16	0.000147333	2	1577.86	1.48251	77.0919	1
Medium	VPAASLQEELEALDALKK	1	1	1	Cfra_2026T1		0	2.64515e+06	27.55	0.00492219	3	1925.06	-0.0504851	99.5577	1
High	DEYNWLLDEILK	1	1	1	Cfra_2782T1		0	2.63232e+06	68.61	5.30226e-07	2	1550.77	0.372905	128.963	0
High	YTFLQFDPAPR	1	1	1	Cfra_2040T1		0	2.59214e+06	30.77	0.00280572	2	1354.68	-0.133385	92.656	0
High	AFSVFLFNSEGK	1	1	1	Cfra_6016T1		0	2.5489e+06	45.66	0.000107299	2	1345.68	0.738511	100.545	0
High	VSSYTDWIK	1	1	1	Cfra_6380T1		0	2.4989e+06	32.73	0.0012	2	1098.55	-0.179312	75.1603	0
Medium	SDNTAMIATSDHETGGISVGGLWIDNPTMASK	2	1	1	Cfra_3806T1		0	2.49549e+06	22.29	0.0174109	3	3276.52	2.5598	97.4733	0
High	WSHLFWDK	1	3	1	Cfra_7262T1		0	2.47798e+06	28.47	0.00305801	2	1118.54	-0.0318758	78.667	0
High	ELLGEDIFWcWDAPR	1	1	1	Cfra_1153T1	C10(Carbamidomethyl)	0	2.46845e+06	47.62	4.06507e-05	2	1906.88	-1.16552	122.283	0
High	KLSYITIGMTSLK	1	1	1	Cfra_7776T1		0	2.44419e+06	31.31	0.00129431	2	1454.83	1.85396	81.9862	1
Medium	TLDIPIEDVDMWYTGPR	1	0	0			0	2.4423e+06	18.08	0.0529028	2	2020.97	1.57151	115.395	0
High	IGEFDFEDEIR	1	1	1	Cfra_4548T1		0	2.43337e+06	61.35	1.50229e-06	2	1369.63	-0.348115	90.2431	0
Medium	VSVSEGGR	1	1	1	Cfra_7076T1		0	2.37791e+06	22.83	0.0216296	2	790.405	-0.333208	24.3679	0
High	LANALGFLSTAVHIIDEK	1	1	1	Cfra_6360T1		0	2.37247e+06	35.13	0.00072122	3	1912.05	-0.0973875	126.92	0
High	DMSTDLITLSR	1	1	1	Cfra_3061T1		0	2.34882e+06	34.02	0.0015653	2	1251.63	0.532628	85.7544	0
High	KESSKK	1	2	1	Cfra_2843T1		0	2.33964e+06	27.93	0.00346289	2	706.405	-6.56788	13.5558	2
Medium	IMHGGDGIDVMLAR	1	1	1	Cfra_3666T1		0	2.29685e+06	20.13	0.0242627	3	1484.73	-0.187244	71.6619	0
High	IIGGFDVDTAPTWTVSLR	1	1	1	Cfra_6946T1		0	2.28044e+06	39.6	0.000449556	2	1948.02	1.73013	106.079	0
High	TLLLAFK	1	1	1	Cfra_6534T1		0	2.17855e+06	24.84	0.00382962	2	805.518	0.296599	84.6309	0
High	GVFLGFR	1	1	1	Cfra_0839T1		0	2.16738e+06	30.46	0.0012593	2	795.452	0.445514	80.2153	0
Medium	ETMLNEFAVLAK	1	0	0			0	2.13014e+06	18.12	0.0531887	2	1365.71	0.416343	101.186	0
High	EAFSLFDK	1	1	1	Cfra_3276T1		0	2.11346e+06	29.53	0.00130064	2	956.473	0.231594	81.1499	0
Medium	SDLEMQYETLQEELMALK	1	1	1	CON_00019359.3		0	2.09378e+06	27.2	0.00628802	2	2171.03	2.79039	120.363	0
Medium	EGSASFADADAGATVAYLDELESVAVEK	1	1	1	Cfra_4754T1		0	2.06046e+06	20.94	0.0193291	2	2815.31	-3.21921	122.552	0
Medium	SPNVAALQDLLIDNLKR	1	1	1	Cfra_5595T1		0	2.00691e+06	22.37	0.0110091	3	1880.06	-0.578273	109.134	1
High	DKAELEALIAALEK	1	1	1	Cfra_0952T1		0	2.00383e+06	45.2	7.09689e-05	3	1513.85	-0.82495	112.52	1
High	VIGFHFIGPNAGEITQGYALAIK	1	1	1	Cfra_3810T1		0	1.9564e+06	33.56	0.00140978	3	2416.3	0.358624	105.273	0
High	DAEDWFFSK	1	4	1	CON_00721270.3		0	1.82154e+06	47.39	2.1289e-05	2	1144.5	0.47487	93.9896	0
High	GSLEEELQEVLK	1	1	1	Cfra_3702T1		0	1.80946e+06	41.17	0.000332269	2	1373.72	-0.572033	108.414	0
Medium	DVELASFINSL	1	0	0			0	1.80565e+06	18.62	0.0419083	2	1207.62	-0.218979	128.73	0
Medium	IEILSTFK	1	1	1	Cfra_7429T1		0	1.79611e+06	20.99	0.0159232	2	950.556	-0.170121	79.6455	0
High	SPNVAALQDLLIDNLK	1	1	1	Cfra_5595T1		0	1.7952e+06	37.32	0.000528257	2	1723.96	0.819884	117.383	0
Medium	SVLDASK	1	1	1	Cfra_5567T1		0	1.70406e+06	23.44	0.019701	2	719.394	0.916421	24.6862	0
Medium	NTVADPGK	2	1	1	Cfra_8133T1		0	1.53841e+06	21.37	0.0124008	2	801.41	-0.619867	7.09571	0
High	GSGGGSSGGSIGGR	1	1	1	CON_00220327.3		0	1.5075e+06	30.56	0.00158224	2	1092.5	-1.16868	13.906	0
Medium	sGSFWGLVVEPGNK	1	1	1	Cfra_0261T1	N-Term(Acetyl)	0	1.26332e+06	28.76	0.00478964	2	1518.76	0.669575	113.024	0
Medium	GPAGPQGPRGDK	1	1	1	CON_00707857.2		0	1.15894e+06	16.05	0.0720109	3	1136.58	-0.660381	20.4806	1
High	NILTQIDLVSLFR	1	1	1	Cfra_0792T1		0	947604	46.31	3.04049e-05	2	1531.89	1.5961	128.44	0
High	DDLFALLEcWEQEQPAEFASIHDDR	1	1	1	Cfra_8556T1	C9(Carbamidomethyl)	0	942003	39.38	0.000161483	3	3034.35	0.330694	131.575	0
Medium	MSLVTSFFFK	1	1	1	Cfra_3745T1		0	864604	28.96	0.00514583	2	1206.62	-0.262864	112.954	0
Medium	GDAGPAGPK	2	1	1	CON_00707857.2		0	818095	22.32	0.00684157	2	769.384	-0.0696708	5.01527	0
Medium	GGDTVAIKDEEDIER	1	0	0			0	460065	15.1	0.0664414	3	1646.79	-0.804408	9.00073	1
High	GTESIYMVEGELTVGFVTEGGR	1	1	1	Cfra_1862T1		0	366516	47.33	6.10259e-05	2	2331.12	0.757972	132.029	0
Medium	SEKDEIGNK	2	1	1	Cfra_4775T1		0	0	25.89	0.00863068	2	1019.5	-1.63359	6.3281	1
Medium	IYFDTSLPEELEMEHNSFYGPTcYGYNQNEQPTSGGWK	1	1	1	Cfra_4568T1	C23(Carbamidomethyl)	0	0	16.65	0.0252439	3	4488.94	2.46206	108.995	0

## Sheet: Search Summary
Search report summary of file(s):
- Y:\AMIR\140527_S_AMIR_01_01.msf
Created with Discoverer version: 1.4.1.14
================================================================================
Number of filtered/unfiltered result items:
- 162/169 protein group(s)
- 277/299 merged protein(s)
- 664/973 peptide(s)
- 985/1411 PSM(s)
- 20317/20317 search input(s)
================================================================================
Peptide Grouping Options
- Show peptide groups: True
- Group peptides by: Mass and Sequence
Protein Grouping Options
- Enable protein grouping: True
- Consider leucine and isoleucine as equal: True
- Consider only PSMs with confidence at least: Medium
- Consider only PSMs with delta Cn better than: 0.15
- Apply strict maximum parsimony principle: True
No filters applied for data reduction
Result filters:
#NAME?
- Peptide Rank (Maximum rank: 1)
================================================================================
Summary of file Y:\AMIR\140527_S_AMIR_01_01.msf
Workflow created with Discoverer version: 1.4.0.288 (DBVersion:79)
================================================================================
Search name: 140527_S_AMIR_01_01
Search description: -
Search date: 06/16/2014 09:33:44
================================================================================
The pipeline tree:
------------------
|-(0) Spectrum Files
|-(1) Spectrum Selector
|-(2) Mascot
|-(3) Target Decoy PSM Validator
|-(4) Event Detector
|-(5) Precursor Ions Area Detector
------------------------------------------------------------------------------
Processing node 0: Spectrum Files
------------------------------------------------------------------------------
Input Data:
-----------------------------
File Name(s): Y:\AMIR\140527_S_AMIR_01_01.raw
------------------------------------------------------------------------------
Processing node 1: Spectrum Selector
------------------------------------------------------------------------------
1. General Settings:
-----------------------------
Precursor Selection: Use MS1 Precursor
Use New Precursor Reevaluation: True
2. Spectrum Properties Filter:
-----------------------------
Lower RT Limit: 0
Upper RT Limit: 0
First Scan: 0
Last Scan: 0
Lowest Charge State: 0
Highest Charge State: 0
Min. Precursor Mass: 350 Da
Max. Precursor Mass: 5000 Da
Total Intensity Threshold: 0
Minimum Peak Count: 1
3. Scan Event Filters:
-----------------------------
Mass Analyzer: Is ITMS
MS Order: Is MS2
Activation Type: Is CID
Min. Collision Energy: 0
Max. Collision Energy: 1000
Scan Type: Is Full
Ionization Source: Is Nanospray
Polarity Mode: Is +
4. Peak Filters:
-----------------------------
S/N Threshold (FT-only): 3
5. Replacements for Unrecognized Properties:
-----------------------------
Unrecognized Charge Replacements: Automatic
Unrecognized Mass Analyzer Replacements: ITMS
Unrecognized MS Order Replacements: MS2
Unrecognized Activation Type Replacements: CID
Unrecognized Polarity Replacements: +
6. Just for Testing:
-----------------------------
Precursor Clipping Range Before: 2.5 Da
Precursor Clipping Range After: 5.5 Da
------------------------------------------------------------------------------
Processing node 2: Mascot
------------------------------------------------------------------------------
1. Input Data:
-----------------------------
Protein Database: AMIR_Creolimax
Enzyme Name: Trypsin
Maximum Missed Cleavage Sites: 3
Instrument: Default
Taxonomy: All entries
1.1 Peptide Scoring Options:
-----------------------------
Peptide Cut Off Score: 10
Peptide Without Protein Cut Off Score: 5
1.2 Protein Scoring Options:
-----------------------------
Use MudPIT Scoring: Automatic
Protein Relevance Threshold: 20
Protein Relevance Factor: 1
2. Tolerances:
-----------------------------
Precursor Mass Tolerance: 7 ppm
Fragment Mass Tolerance: 0.5 Da
Use Average Precursor Mass: False
4. Dynamic Modifications:
-----------------------------
4. Dynamic Modification: Oxidation (M)
5. Dynamic Modification: Acetyl (Protein N-term)
5. Static Modifications:
-----------------------------
1. Static Modification: Carbamidomethyl (C)
------------------------------------------------------------------------------
Processing node 5: Precursor Ions Area Detector
------------------------------------------------------------------------------
------------------------------------------------------------------------------
Processing node 3: Target Decoy PSM Validator
------------------------------------------------------------------------------
1. Decoy Database Search:
-----------------------------
Target FDR (Strict): 0.01
Target FDR (Relaxed): 0.05
------------------------------------------------------------------------------
Processing node 4: Event Detector
------------------------------------------------------------------------------
1. General Settings:
-----------------------------
Mass Precision: 2 ppm
S/N Threshold: 1
================================================================================
Further information:
Mascot (2):
- Fasta database information: FASTA db: AMIR_Creolimax.fasta
Version: 2.4
Number of sequences: 9242
Number of sequences after taxonomy: 9242
Taxonomy:
Enzyme:
Number of queries: 20317
- MudPitScoring: True
================================================================================
Processing details:
06/16/2014 09:45 AM	(5):Precursor Ions Area Detector:	Whole quantification took 26.8 s.
06/16/2014 09:45 AM	(5):Precursor Ions Area Detector:	Storing 1146 remaining single precursor patterns ...
06/16/2014 09:45 AM	(5):Precursor Ions Area Detector:	Storing 0 precursor ion quantification results ...
06/16/2014 09:45 AM	(5):Precursor Ions Area Detector:	Storing 0 peptide verification results ...
06/16/2014 09:44 AM	(5):Precursor Ions Area Detector:	Start verification of peptides identified from Mascot
06/16/2014 09:44 AM	(5):Precursor Ions Area Detector:	Start quantification for file: 140527_S_AMIR_01_01.raw ...
06/16/2014 09:44 AM	(4):Event Detector:	All 1 files processed in 3 min 39 s
06/16/2014 09:44 AM	(4):Event Detector:	Event proccessing finished after 3 min 22 s.
06/16/2014 09:41 AM	(4):Event Detector:	Start Event Processing on: 140527_S_AMIR_01_01.raw with scan filter: FTMS + p NSI Full ms [350.00-1500.00]
06/16/2014 09:41 AM	(2):Mascot:	Total search time was 3 min 10 s.
06/16/2014 09:41 AM	(2):Mascot:	Search completed
06/16/2014 09:41 AM	(2):Mascot:	299 protein(s) + 43 decoy proteins scored and inserted into result file in 1.6 s.
06/16/2014 09:41 AM	(2):Mascot:	299 protein(s) scored
06/16/2014 09:41 AM	(2):Mascot:	Search result finalization started.
06/16/2014 09:41 AM	(3):Target Decoy PSM Validator:	Start calculating relaxed False Discovery Rate
06/16/2014 09:41 AM	(3):Target Decoy PSM Validator:	Start calculating strict False Discovery Rate
06/16/2014 09:40 AM	(3):Target Decoy PSM Validator:	Evaluating peptides of Mascot (2) started
06/16/2014 09:40 AM	(2):Mascot:	Used mascot server http://mascot.linux.crg.es/mascot/ with Mascot version 2.4.1
06/16/2014 09:40 AM	(2):Mascot:	Sending 3637 peptide hits (6823 peptides) to result file
06/16/2014 09:40 AM	(2):Mascot:	Sending 2822 decoy peptide hits (5314 peptides) to result file
06/16/2014 09:40 AM	(2):Mascot:	Reading decoy results
06/16/2014 09:40 AM	(2):Mascot:	Start translating results
06/16/2014 09:40 AM	(2):Mascot:	Start mapping modifications
06/16/2014 09:40 AM	(2):Mascot:	Received 335 proteins from Mascot server
06/16/2014 09:40 AM	(2):Mascot:	Start mapping 335 proteins
06/16/2014 09:40 AM	(2):Mascot:	Start parsing results
06/16/2014 09:40 AM	(2):Mascot:	Received Mascot result file (filename=../../../../../../mascot/data//20140616/F005314.dat)
06/16/2014 09:40 AM	(2):Mascot:	Mascot Server completed
06/16/2014 09:38 AM	(2):Mascot:	Mascot result on server (filename=../../../../../../mascot/data//20140616/F005314.dat)
06/16/2014 09:38 AM	(2):Mascot:	Start searching 20317 spectra
06/16/2014 09:34 AM	(2):Mascot:	Use mascot server http://mascot.linux.crg.es/mascot/ with Mascot version 2.4.1
06/16/2014 09:33 AM	(1):Spectrum Selector:	Reading from File 1 of 1:Y:\AMIR\140527_S_AMIR_01_01.raw (25093 spectra total)
