# Supplementary figures and images for: Complex transcriptional regulation and independent evolution of fungal-like traits in a relative of animals
Source: eLife journal article supplement (doi:10.7554/elife.08904), 2015-10-14

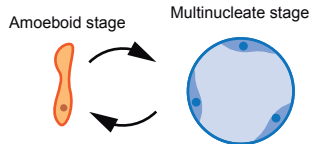

# PFAM Domain Enrichment Map

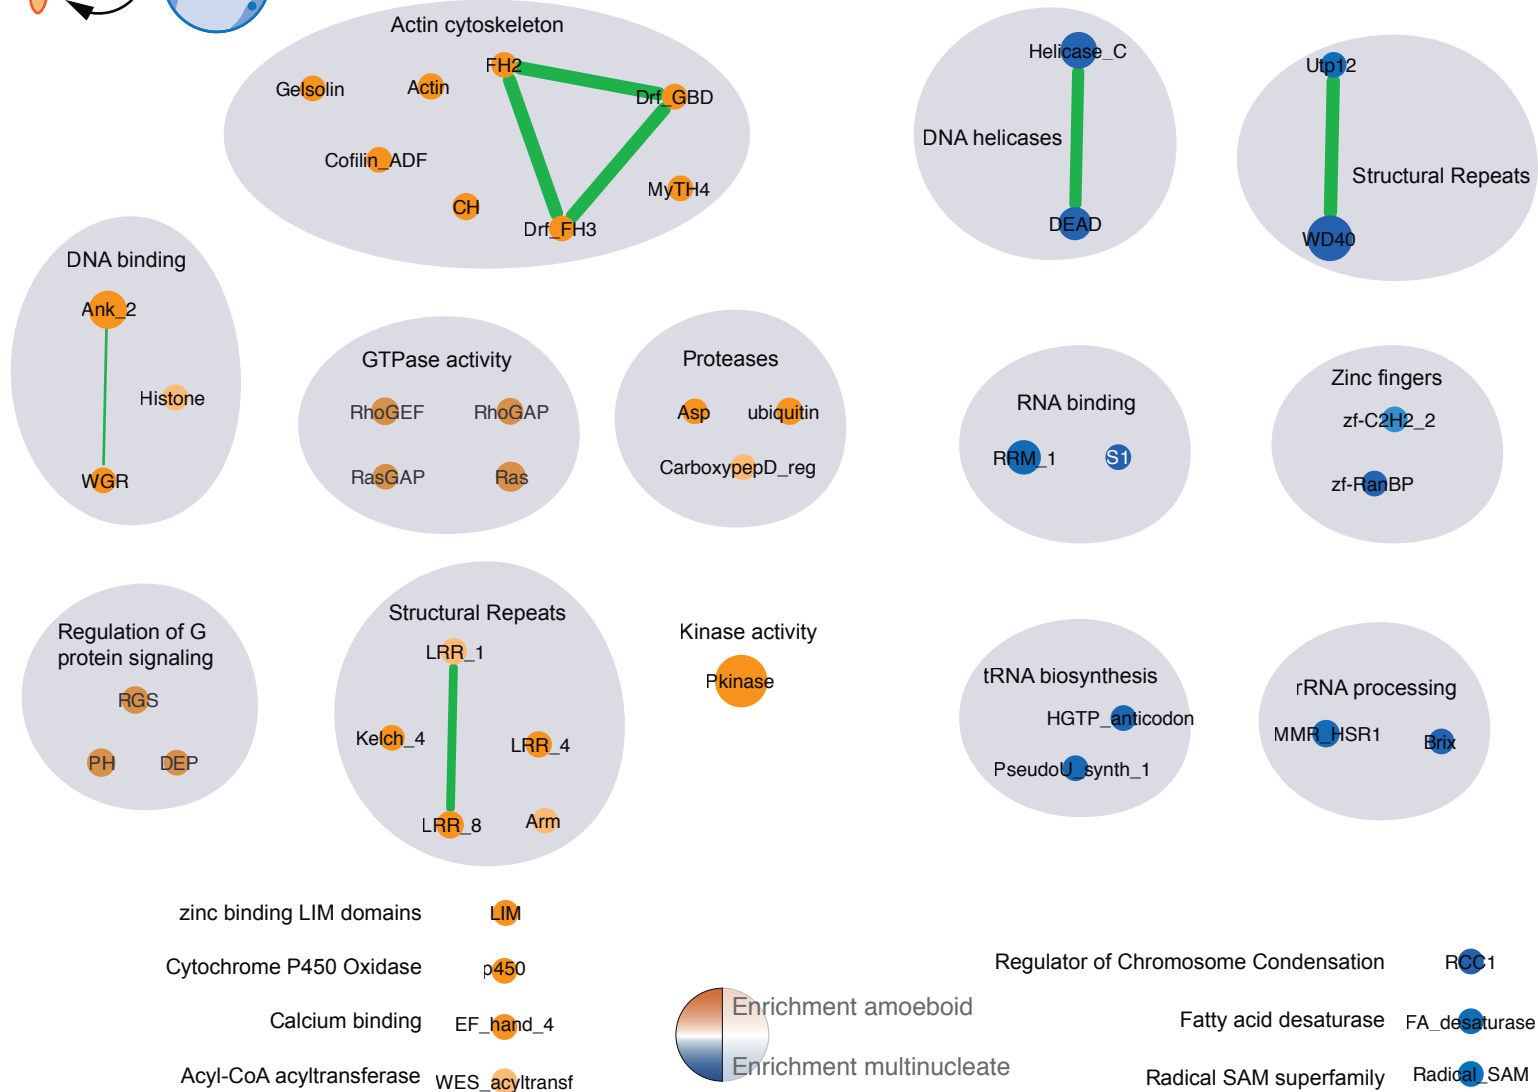

Supplement: supp [file elife-08904-supp-v1.zip]

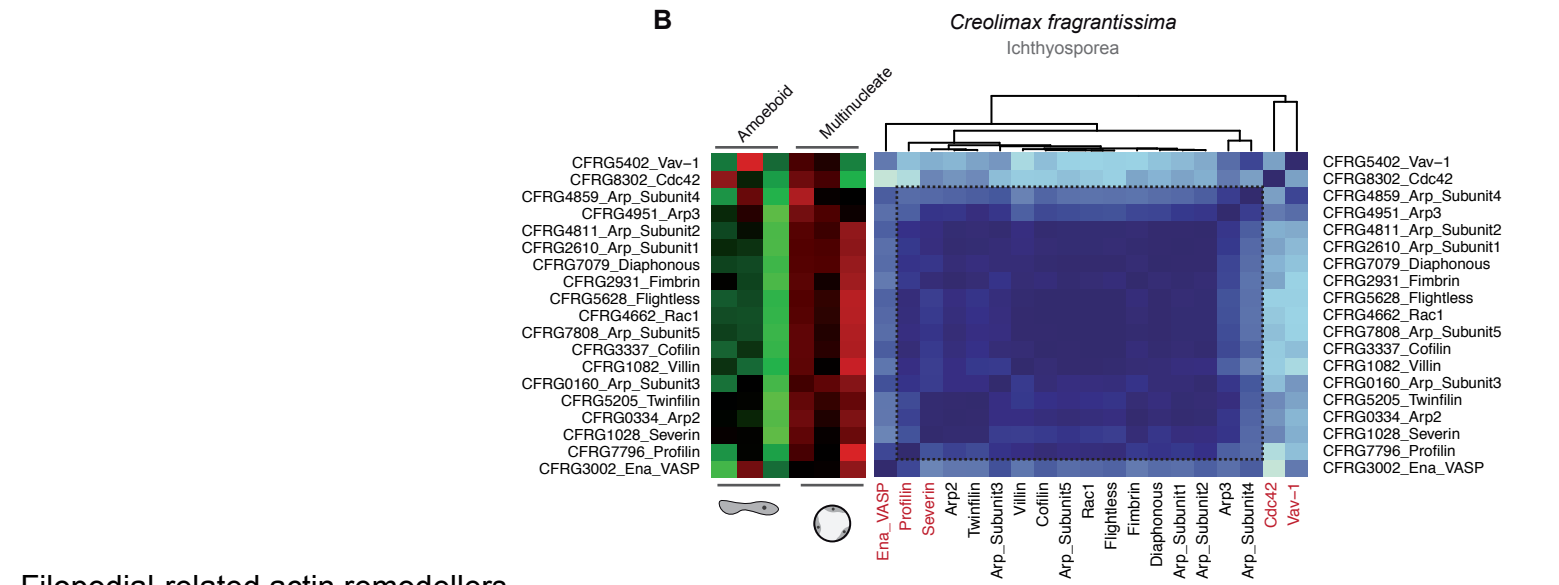

## Filopodial-related actin remodellers

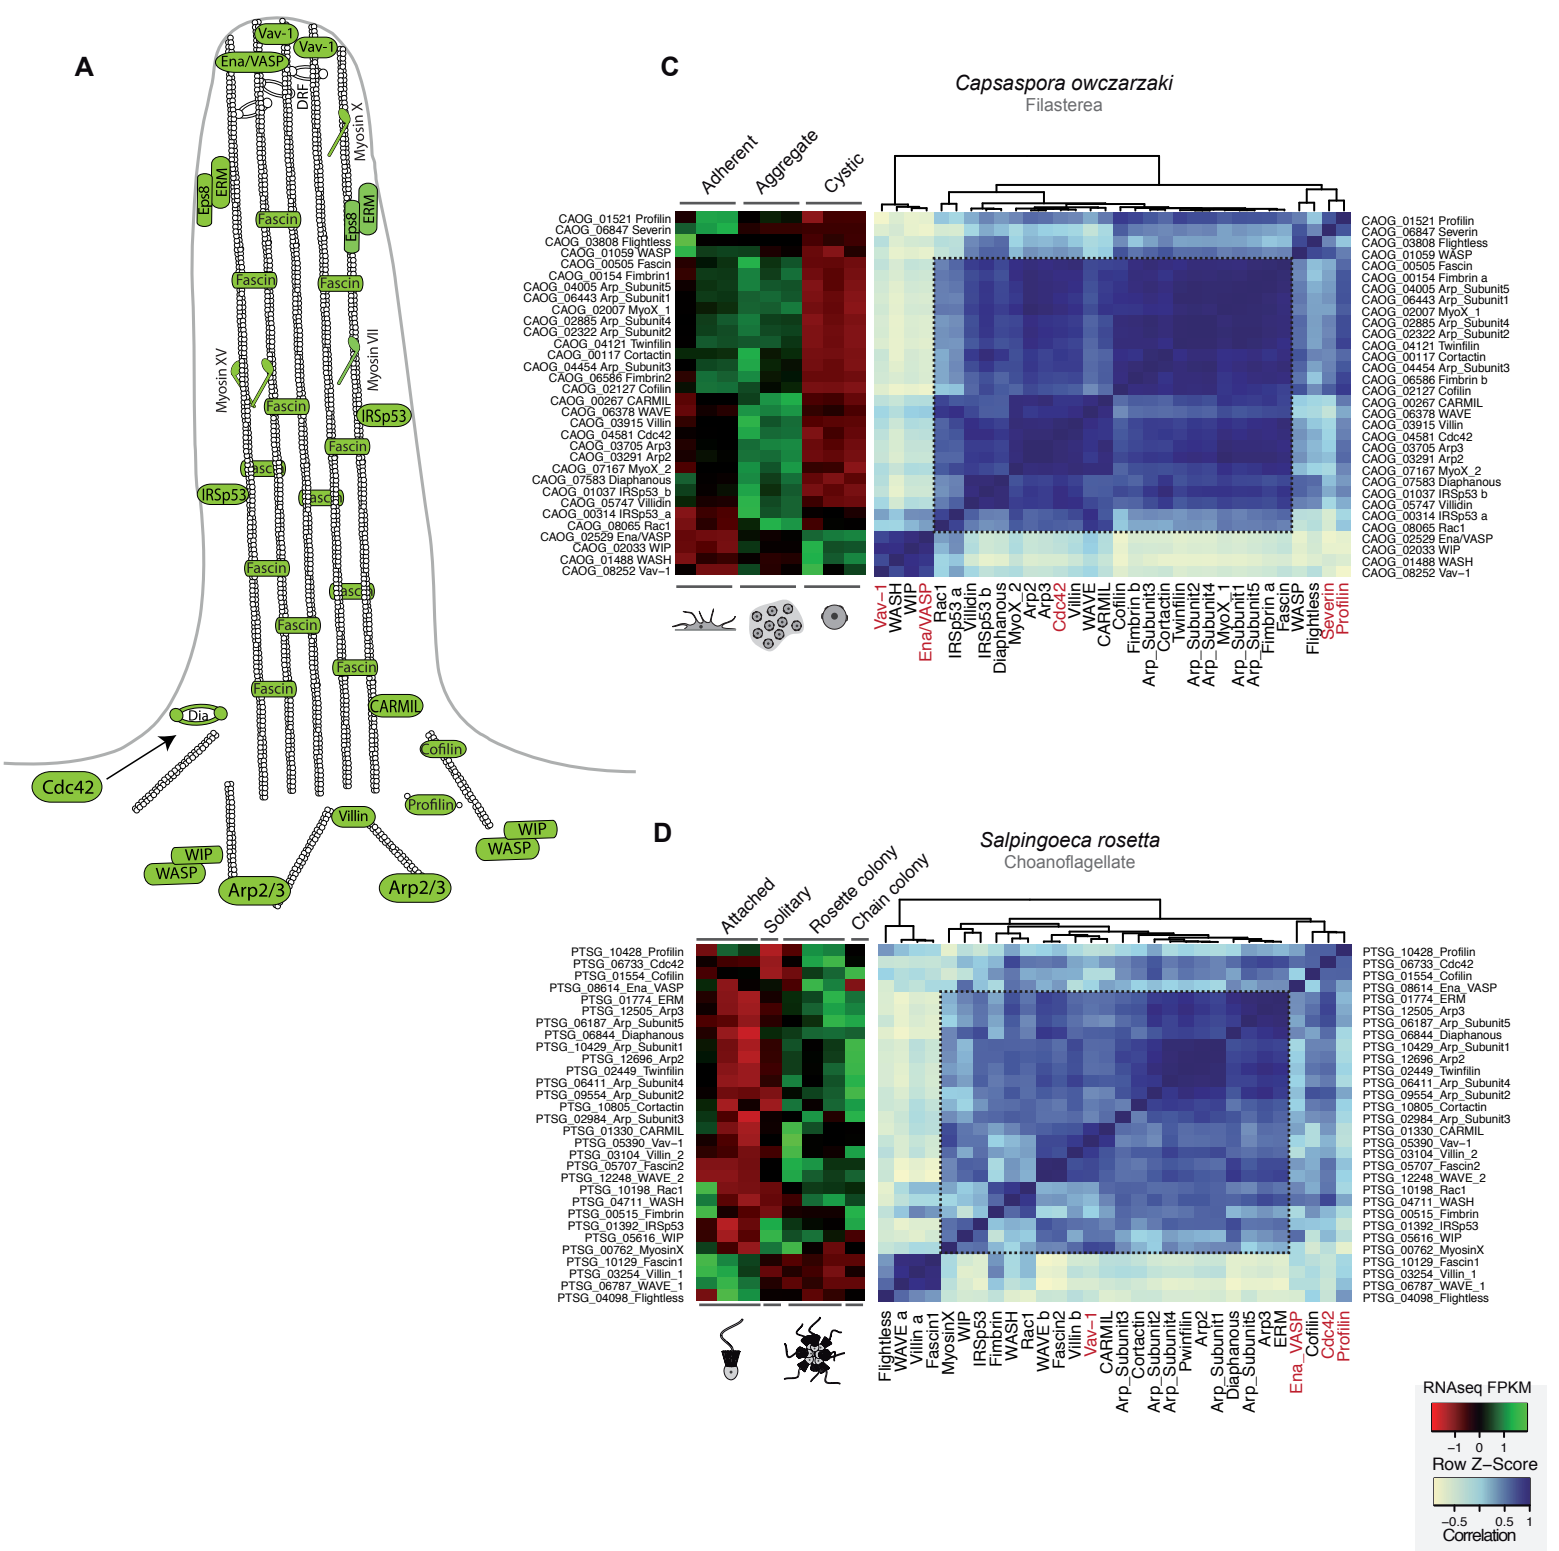

Supplement: supp [file elife-08904-supp-v1.zip]

## Intron retention

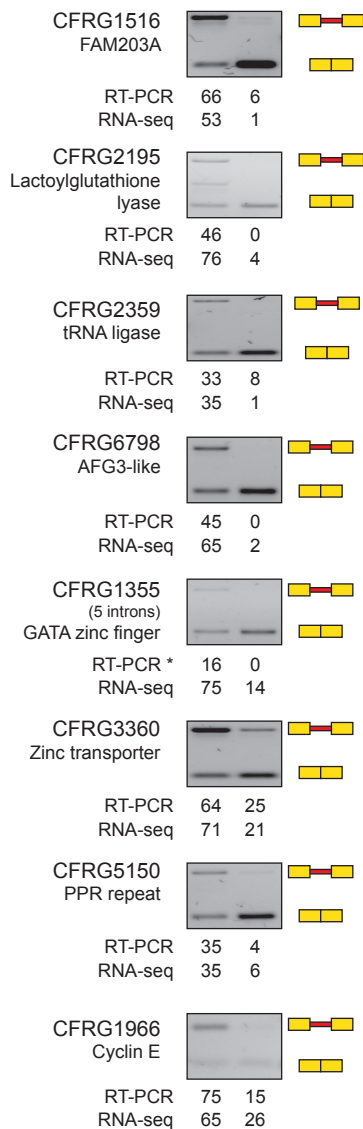

## Exon skipping

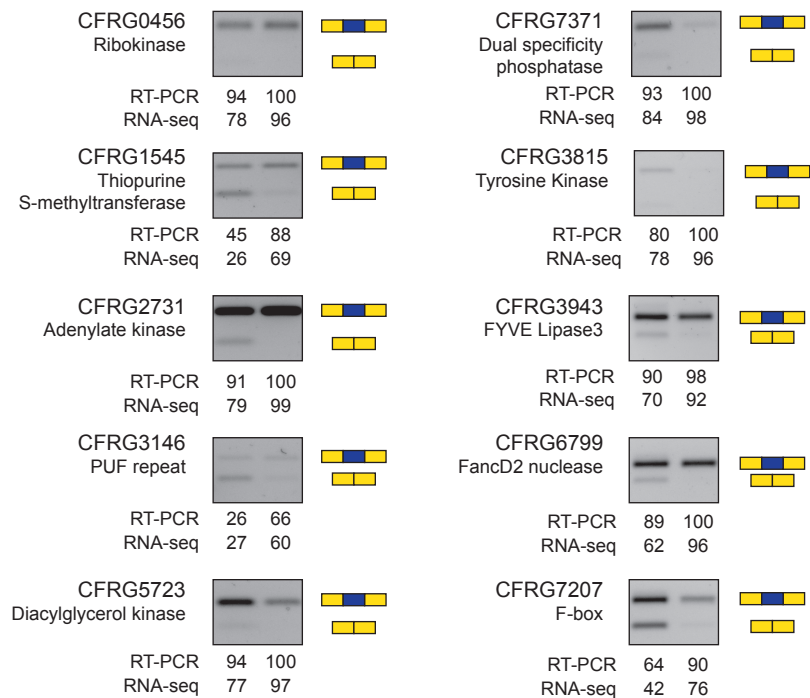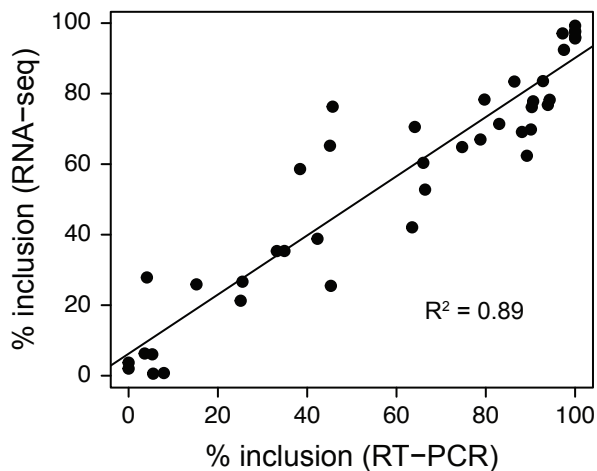

Supplement: supp [file elife-08904-supp-v1.zip]

A

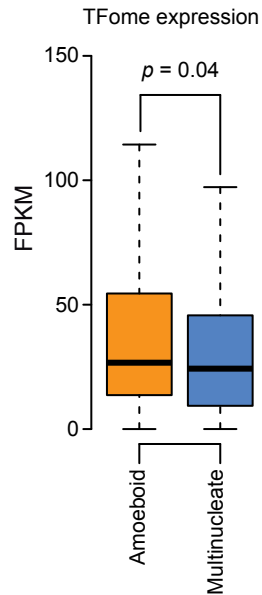

B

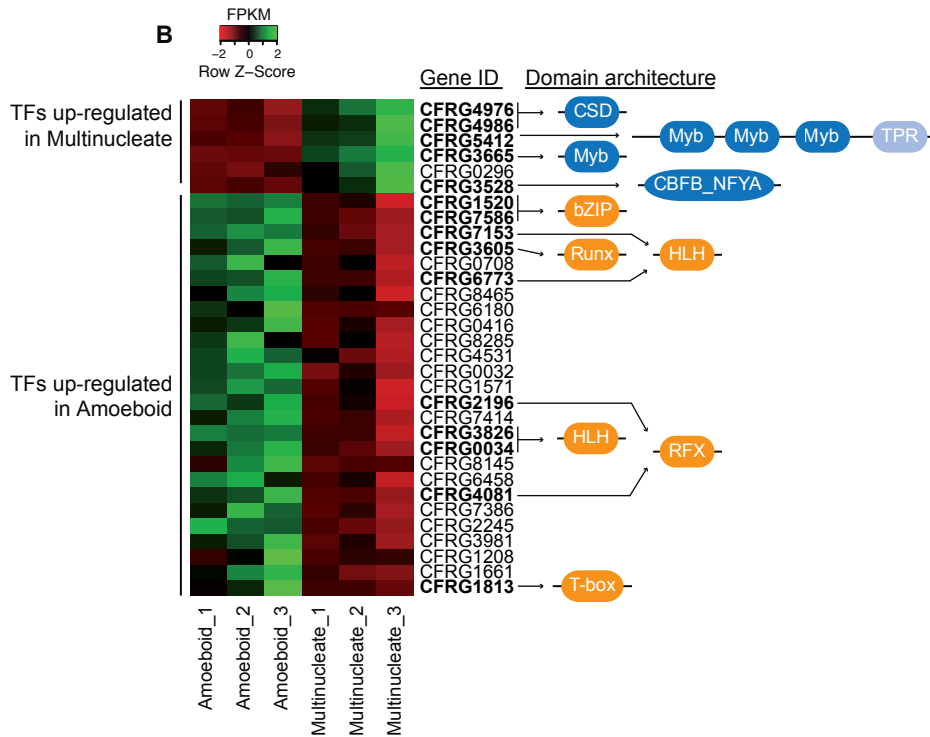

Supplement: supp [file elife-08904-supp-v1.zip]

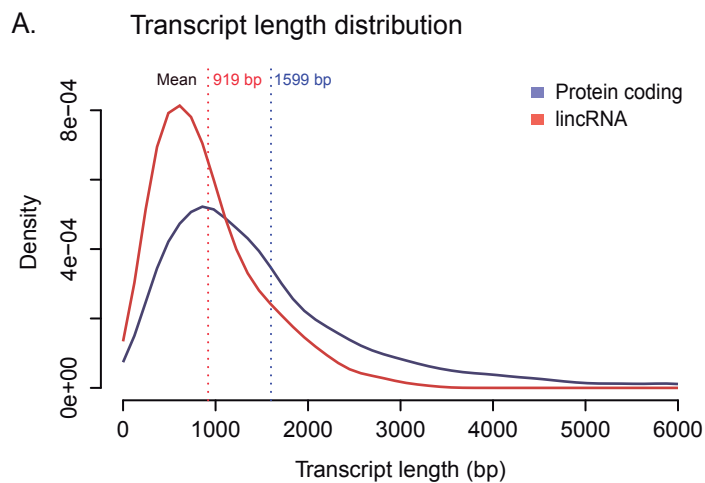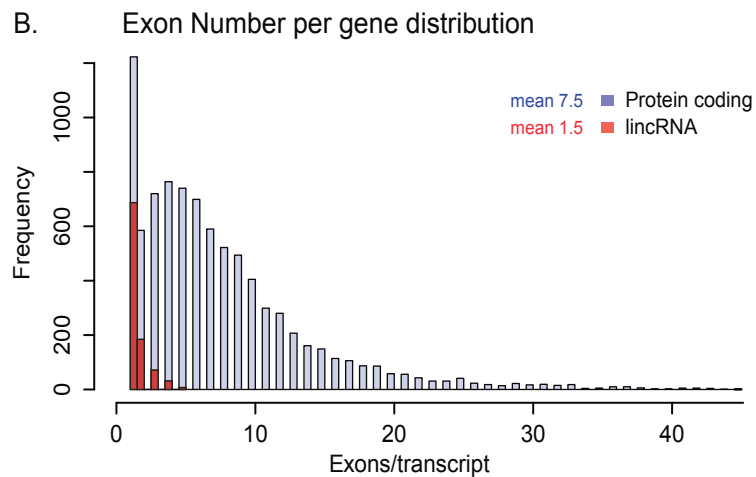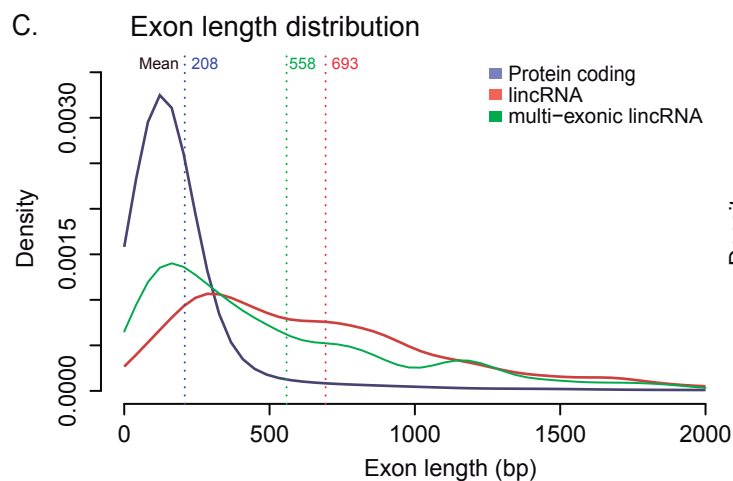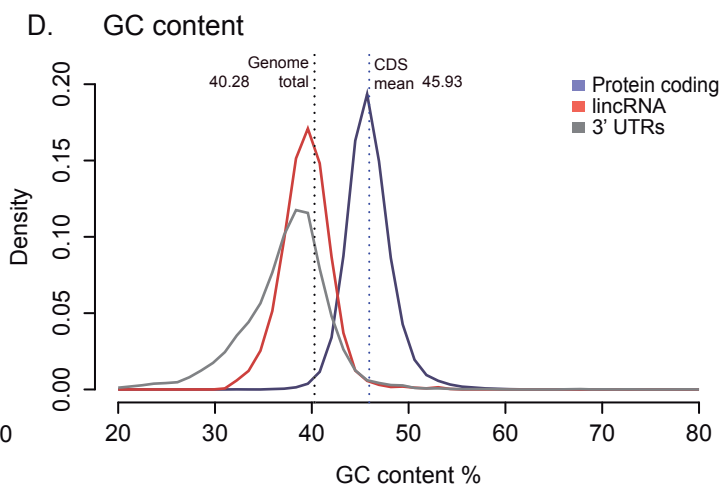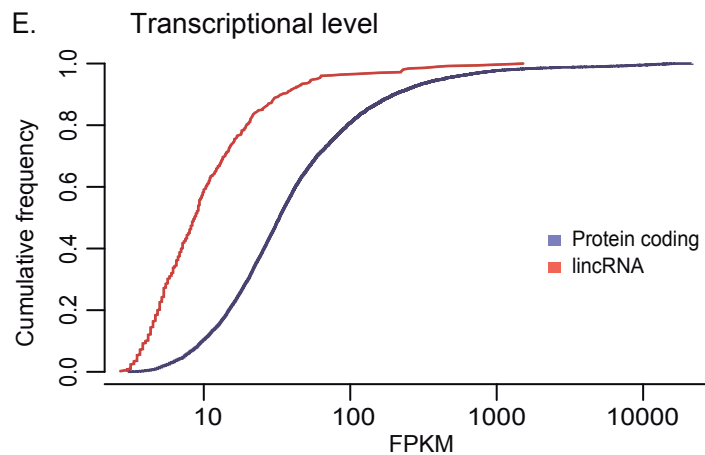

Supplement: supp [file elife-08904-supp-v1.zip]

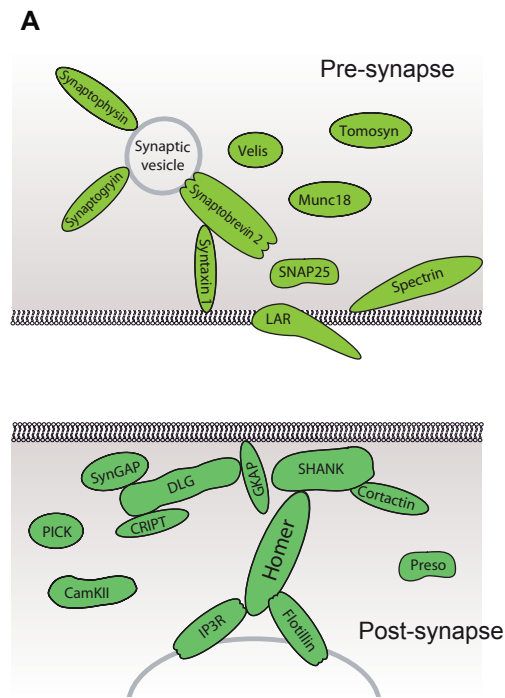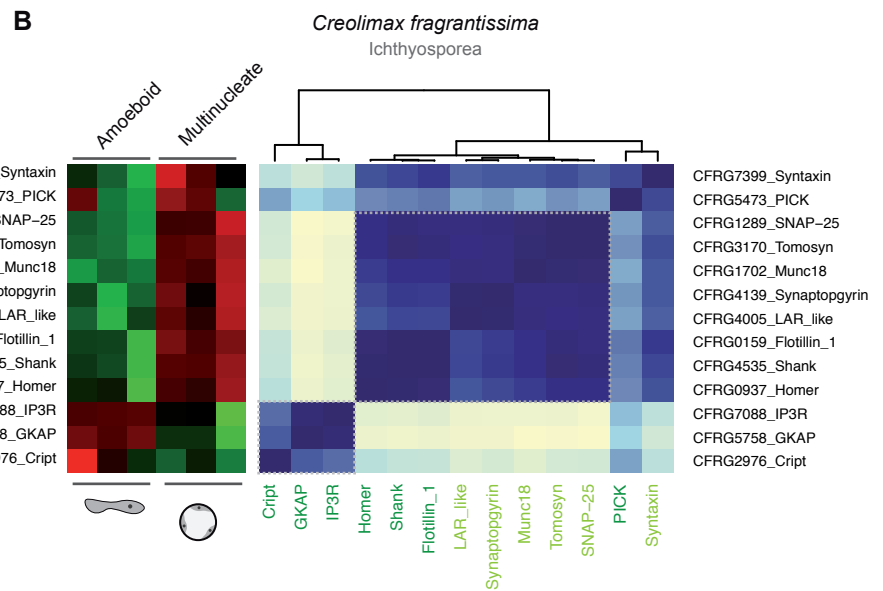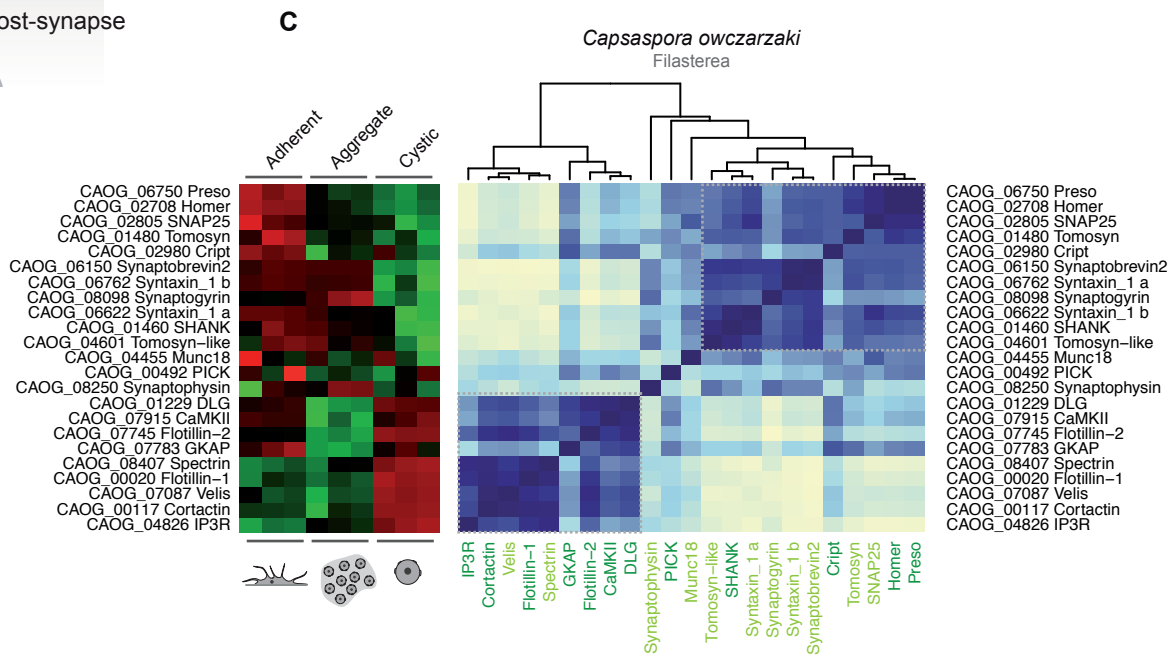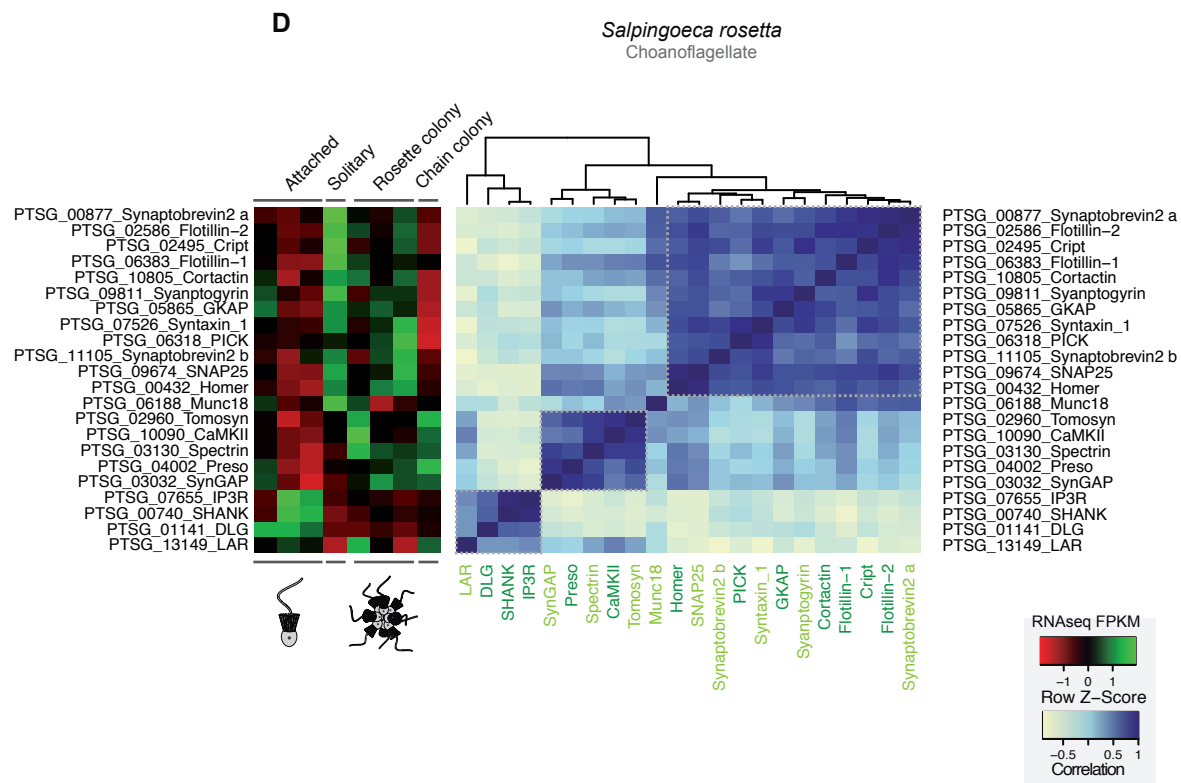

Supplement: supp [file elife-08904-supp-v1.zip]

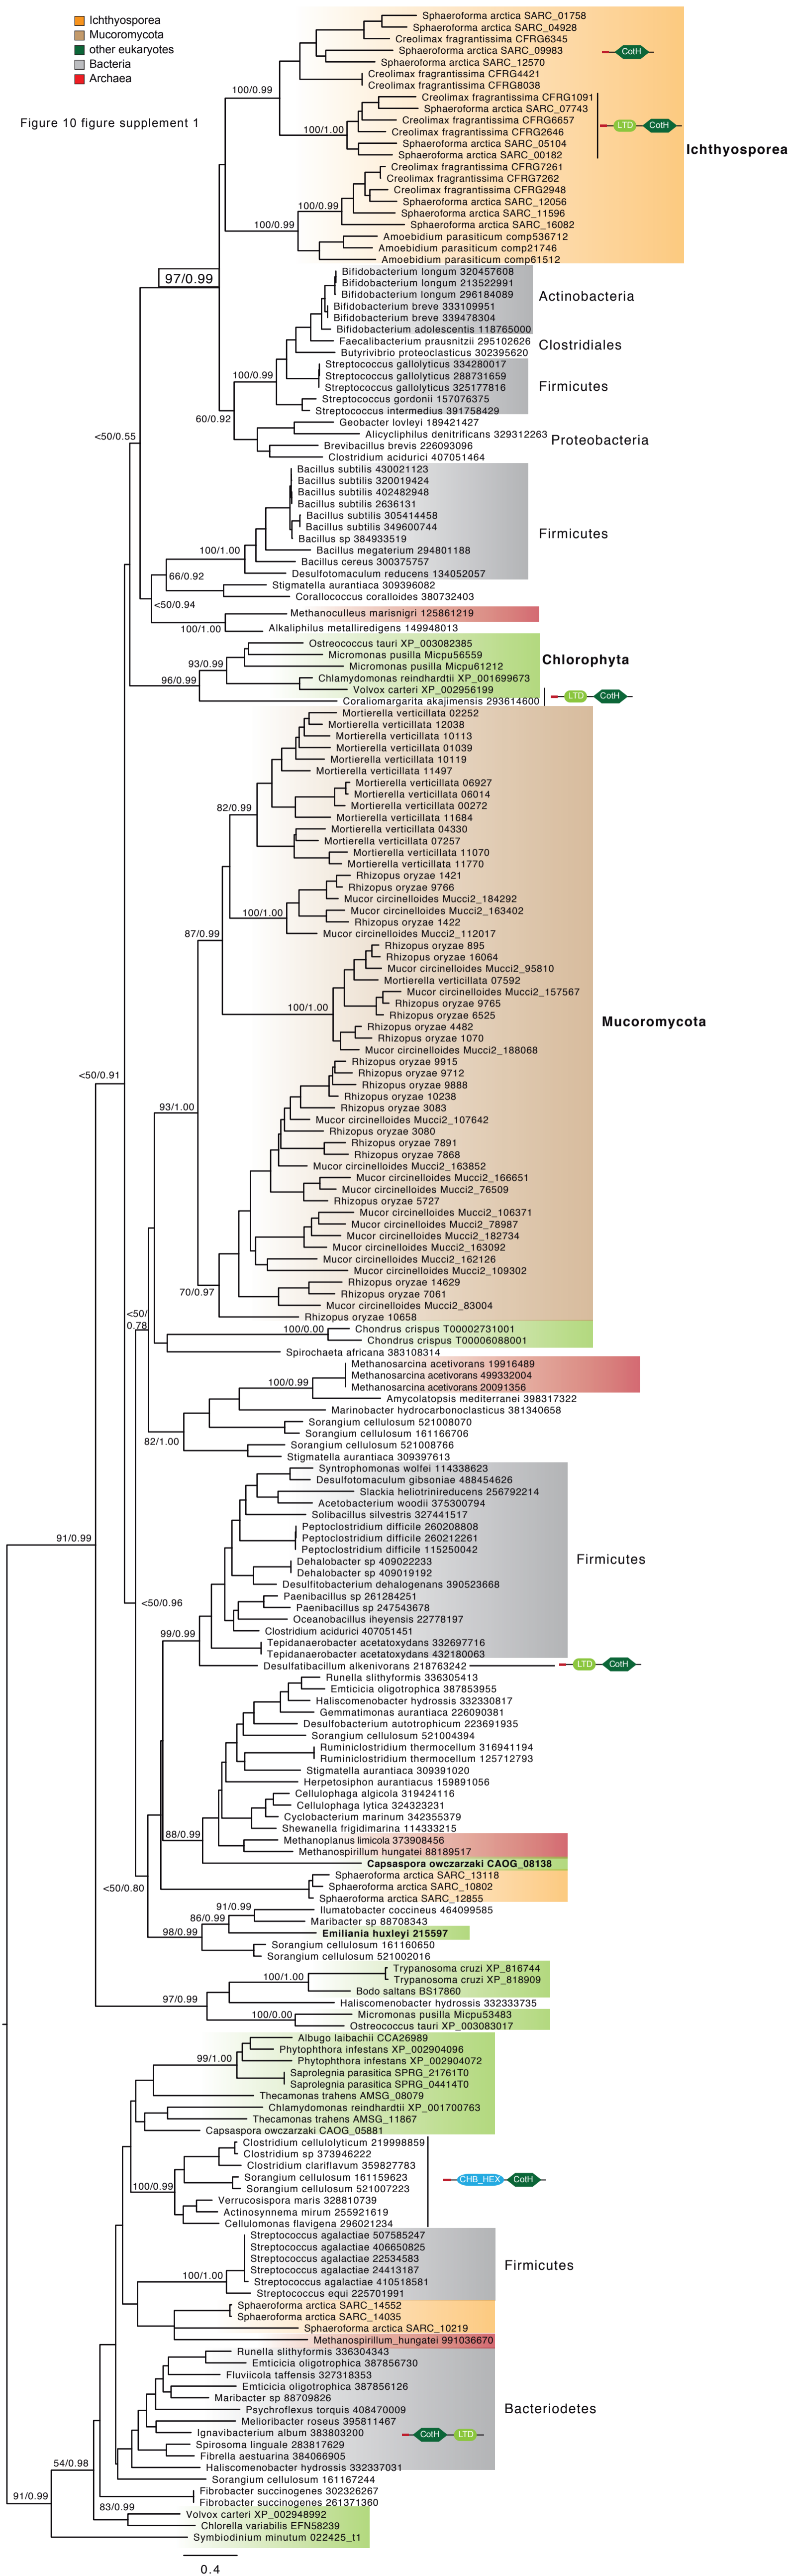

Supplement: supp [file elife-08904-supp-v1.zip › elife_poa_e08904_Figure_10_figure_supplement_1.pdf]

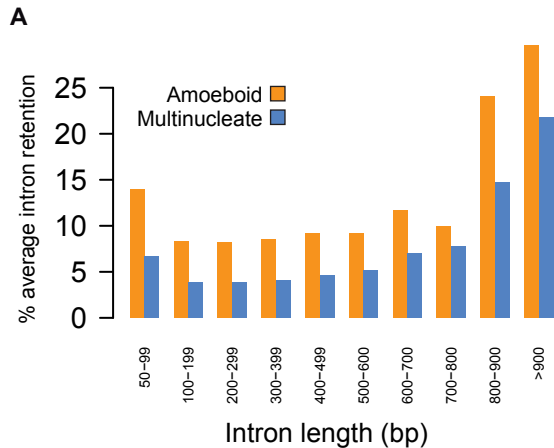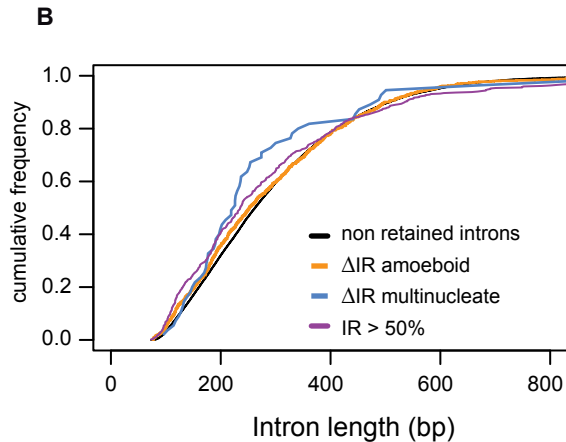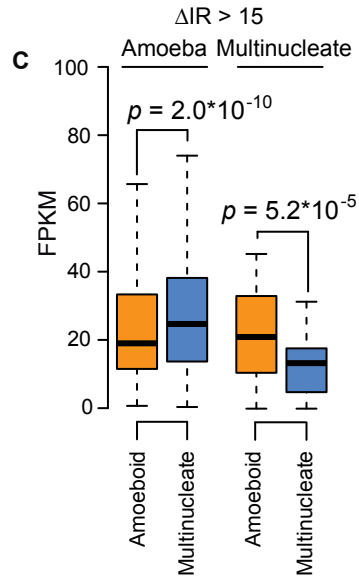

Supplement: supp [file elife-08904-supp-v1.zip › elife_poa_e08904_Figure_3_figure_supplement_1.pdf]

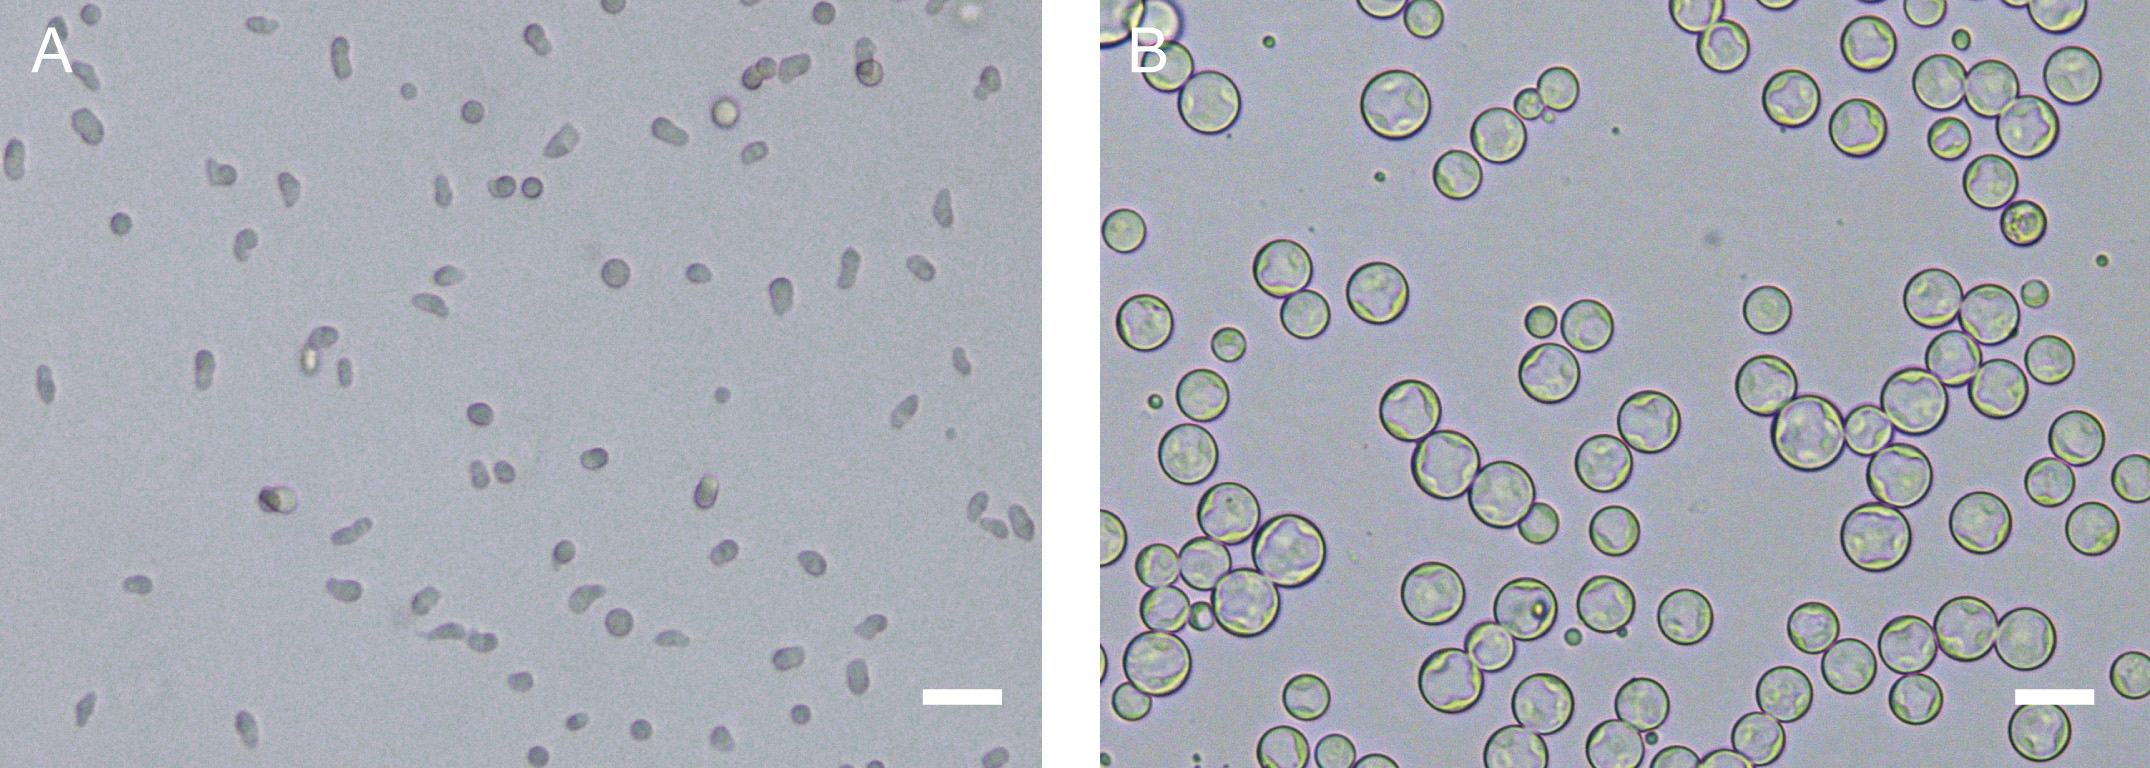

Supplement: supp [file elife-08904-supp-v1.zip › elife_poa_e08904_Figure_1_figure_supplement_1.jpg]

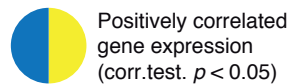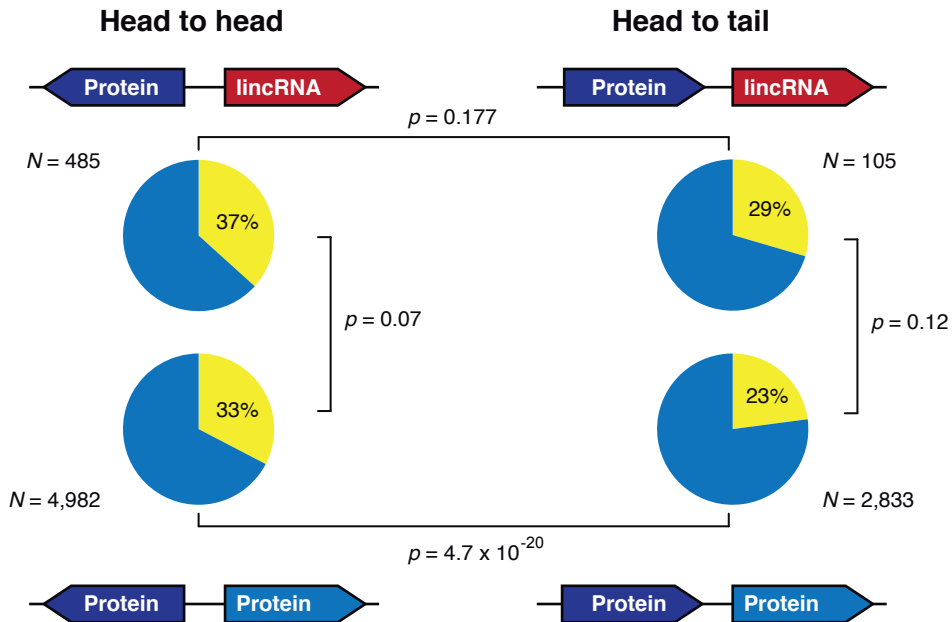

Supplement: supp [file elife-08904-supp-v1.zip › elife_poa_e08904_Figure_4_figure_supplement_2.pdf]
